# Supplementary material for: Epidemiology of knee osteoarthritis in general practice: a registry-based study
Source: PubMed Central journal article supplement — BMJ Open. 2020 Jan 20;10(1):e031734. doi: 10.1136/bmjopen-2019-031734 (PMC7044813; doi:10.1136/bmjopen-2019-031734), 2020-01-20
Supplement: bmjopen-2019-031734.reviewer_comments.pdf [file bmjopen-2019-031734.reviewer_comments.pdf]

# BMJ Open

BMJ Open is committed to open peer review. As part of this commitment we make the peer review history of every article we publish publicly available.

When an article is published we post the peer reviewers' comments and the authors' responses online. We also post the versions of the paper that were used during peer review. These are the versions that the peer review comments apply to.

The versions of the paper that follow are the versions that were submitted during the peer review process. They are not the versions of record or the final published versions. They should not be cited or distributed as the published version of this manuscript.

BMJ Open is an open access journal and the full, final, typeset and author-corrected version of record of the manuscript is available on our site with no access controls, subscription charges or pay-per-view fees (<http://bmjopen.bmj.com>).

If you have any questions on BMJ Open's open peer review process please email [info.bmjopen@bmj.com](mailto:info.bmjopen@bmj.com)

# BMJ Open

## The epidemiology of knee osteoarthritis in general practice: a registry-based study

|                               |                                                                                                                                                                                                                                                                                                                                                                                                                                                                                                                                                                                                                                                                                                                                                                                                                                                                                                                                           |
|-------------------------------|-------------------------------------------------------------------------------------------------------------------------------------------------------------------------------------------------------------------------------------------------------------------------------------------------------------------------------------------------------------------------------------------------------------------------------------------------------------------------------------------------------------------------------------------------------------------------------------------------------------------------------------------------------------------------------------------------------------------------------------------------------------------------------------------------------------------------------------------------------------------------------------------------------------------------------------------|
| Journal:                      | <i>BMJ Open</i>                                                                                                                                                                                                                                                                                                                                                                                                                                                                                                                                                                                                                                                                                                                                                                                                                                                                                                                           |
| Manuscript ID                 | bmjopen-2019-031734                                                                                                                                                                                                                                                                                                                                                                                                                                                                                                                                                                                                                                                                                                                                                                                                                                                                                                                       |
| Article Type:                 | Research                                                                                                                                                                                                                                                                                                                                                                                                                                                                                                                                                                                                                                                                                                                                                                                                                                                                                                                                  |
| Date Submitted by the Author: | 16-May-2019                                                                                                                                                                                                                                                                                                                                                                                                                                                                                                                                                                                                                                                                                                                                                                                                                                                                                                                               |
| Complete List of Authors:     | Spitaels, David; Katholieke Universiteit Leuven, Departement of Public Health and Primary Care<br>Mamouris, Pavlos; Katholieke Universiteit Leuven Groep Biomedische Wetenschappen, Departement of Public Health and Primary Care<br>Vaes, Bert; Katholieke Universiteit Leuven Groep Biomedische Wetenschappen, Departement of Public Health and Primary Care;<br>Universite catholique de Louvain, Louvain Drug Research Institute<br>Smeets, Miek; Katholieke Universiteit Leuven Groep Biomedische Wetenschappen, Departement of Public Health and Primary Care<br>Luyten, F; Katholieke Universiteit Leuven UZ Leuven, Rheumatology<br>Hermens, Rosella; Radboudumc IQ healthcare; Katholieke Universiteit Leuven Groep Biomedische Wetenschappen, Departement of Public Health and Primary Care<br>Vankrunkelsven, Patrik; Katholieke Universiteit Leuven Groep Humane Wetenschappen, Departement of Public Health and Primary Care |
| Keywords:                     | Knee < ORTHOPAEDIC & TRAUMA SURGERY, Musculoskeletal disorders < ORTHOPAEDIC & TRAUMA SURGERY, PRIMARY CARE, PUBLIC HEALTH                                                                                                                                                                                                                                                                                                                                                                                                                                                                                                                                                                                                                                                                                                                                                                                                                |
|                               |                                                                                                                                                                                                                                                                                                                                                                                                                                                                                                                                                                                                                                                                                                                                                                                                                                                                                                                                           |

SCHOLARONE™  
Manuscripts

# The epidemiology of knee osteoarthritis in general practice: a registry-based study

## Authors

David Spitaels<sup>1</sup>; Pavlos Mamouris<sup>1</sup>; Bert Vaes<sup>1,2</sup>; Miek Smeets<sup>1</sup>; Frank Luyten<sup>3</sup>; Rosella Hermens<sup>1,2</sup>;  
Patrik Vankrunkelsven<sup>1</sup>

## Affiliations

<sup>1</sup> Academic Center for General Practice, KU Leuven, Leuven, Belgium

<sup>2</sup> Louvain Drug Research Institute, Clinical Pharmacy Research Group and Institute of Health and Society (IRSS), Université catholique de Louvain (UCL), Brussels, Belgium

<sup>3</sup> Division of Rheumatology, University Hospitals Leuven, Leuven, Belgium

<sup>4</sup> Radboud Institute for Health Sciences (RIHS), IQ Healthcare, Radboud University Medical Center

## Correspondence

D. Spitaels, MD, ORCID ID 0000-0002-7900-7533

Academic Center for General Practice, KU Leuven

Kapucijnenvoer 33, J building, 3000 Leuven, Belgium

E-mail: [david.spitaels@kuleuven.be](mailto:david.spitaels@kuleuven.be)

## Word count

2983/4000

# The epidemiology of knee osteoarthritis in general practice: a registry-based study

## Abstract

**Objectives** The present study investigated (i) trends in the prevalence and incidence of knee osteoarthritis over a 20-year period; (ii) trends in comorbidity; and (iii) trends in drug prescriptions.

**Design** Registry-based study.

**Setting** Primary health care, Flanders, Belgium.

**Participants** Data were collected from Intego, a general practice-based morbidity registration network. In the study period between 1996 and 2015 data from 440,140 unique patients were available.

**Outcome measures** International Classification of Primary Care (ICPC-2) and International Statistical Classification of Diseases and Related Health Problems 10th Revision (ICD-10) were used to classify diagnoses in Intego. Trends in prevalence and incidence rate of knee osteoarthritis were computed using joinpoint regression analysis. The mean disease count was calculated to assess trends in comorbidity. In addition, the number of drug prescriptions was identified by the Anatomical Therapeutic Chemical Classification code and trends were equally recorded with joinpoint regression.

**Results** The prevalence of knee osteoarthritis increased from 1.99% in 1996 to 3.56% in 2015. An upward trend was observed with an average annual percentage change (AAPC) of 2.5 (95%CI 2.2-2.9). The incidence remained stable with 3.75‰ in 2015 (AAPC=-0.5, 95%CI -1.4-0.5). The mean disease count significantly increased from 1.63 to 2.34 ( $p<0.001$ ) for incident cases with knee osteoarthritis. Finally, we observed a significantly positive trend in the overall prescription of acetaminophen (AAPC= 6.7, 95%CI 5.6-7.7), weak opioids (AAPC= 4.0, 95%CI 0.9-7.3) and glucosamine (AAPC= 8.6, 95%CI 2.4-15.1).

**Conclusions** Increased prevalence, comorbidity, and number of drug prescriptions confirm an increased burden of knee osteoarthritis. In future, these trends can be used to prioritize initiatives for improvement in care.

## Key Words

Knee osteoarthritis; multimorbidity; general practice; trends; burden of illness

## Article Summary

### Strengths and limitations of this study

- The Intego open registry provides real-world data of 440,140 unique patients in a primary care setting, representative for the Flemish population.
- This registry database, with data over a 20-year time period (1996-2015), lends itself perfectly for trend analyses.
- Estimates on the prevalence and incidence of knee osteoarthritis are scarce for primary care settings. This study defines knee osteoarthritis when it becomes a healthcare problem for the patient.
- Data completeness depends on the quality of registration of the participating general practitioners. To this end, only optimal registration practices are included in the Intego database.
- The lack of data verification and misclassification is minimalised because new diagnoses are automatically linked to ICPC-2 and ICD-10 codes.

## Introduction

Osteoarthritis (OA) is the most common joint disease and is expected to become the fourth leading cause of disability worldwide by 2020.<sup>1</sup> OA mainly affects the joints of the knees, hips, hands, facets and feet, but knee OA accounts for 83% of the total OA burden.<sup>2</sup> The prevalence of knee OA varies according to the definition: from subjective (population-based) assessments to clinical and radiographic definitions, often with low levels of concordance between them.<sup>3</sup> However, estimates on the prevalence of knee OA are scarce for primary care settings.<sup>4</sup>

At present, the purposes of conservative knee OA treatment are to alleviate pain, to improve the function of the joint and to slow down joint damage by pharmacological and non-pharmacological means.<sup>5</sup> Pharmacological management is dominated both by acetaminophen and by nonsteroidal anti-inflammatory drugs (NSAIDs).<sup>5-8</sup> Although the review by Machado et al. suggested that acetaminophen has little clinical benefit in OA, guidelines recommend starting with acetaminophen, because the adverse side effect profile of NSAIDs.<sup>9</sup> The presence of comorbidities may also affect choices in the pharmacological management.<sup>10-12</sup> Almost all patients with OA suffer from at least one comorbid disease.<sup>13</sup> Common comorbidities in patients with knee OA are cardiovascular diseases, diabetes mellitus, chronic obstructive pulmonary disease, and obesity.<sup>14</sup> Nevertheless, comorbidity-adapted management protocols are being developed and provide tailored guidance for pharmacological management and exercise therapy.<sup>5,8</sup>

The aims of the present study were 1) to evaluate time trends in the prevalence and incidence of patients with knee OA managed in general practice; 2) to assess trends in the comorbid burden and 3) to assess trends in drug prescriptions over a 20-year period. Hence, we extracted “real world” data from the Belgian primary care-based Intego patient register. Important attributes of most patient registries are

1  
2  
3 their large sample size and data variability.<sup>15</sup> The health trends from the Intego register aim to be  
4 hypothesis generating rather than hypothesis testing and can be used to prioritize initiatives for  
5 improvement in care.  
6  
7

## 8 9 Methods

### 10 11 Design and participants

12  
13 This trend analysis study was performed using Intego, a general practice-based morbidity registration  
14 network in Flanders, Belgium.<sup>16</sup> The Intego database comprises data extracted from electronic health  
15 records (EHR) of general practitioners (GPs), all using the medical software programme Medidoc  
16 (Corilus NV, Aalter, Belgium).<sup>17</sup> In 2015, 111 GPs of 48 practices evenly spread throughout Flanders,  
17 collaborated in the Intego project. GPs applied for inclusion in the registry. Before acceptance of their  
18 data, registration performance was audited using a number of algorithms that compared their results  
19 with those of all other applicants. Only the data of the practices with an optimal registration performance  
20 were included in the database. The selection procedure was described in detail previously.<sup>16</sup> The Intego  
21 GPs prospectively and routinely registered all new diagnoses together with new drug prescriptions, as  
22 well as laboratory test results, some background information (including gender and year of birth) and  
23 some biomedical parameters (i.e. blood pressure, height, weight, smoking status and mortality), using  
24 computer-generated keywords internally linked to codes. With specially framed extraction software,  
25 new data were encrypted and collected from the GPs' personal computers and entered into a central  
26 database. Registered data were continuously updated and chronologically accumulated for each patient.  
27 New diagnoses were classified according to a very detailed thesaurus and automatically linked to the  
28 International Classification of Primary Care (ICPC-2) and International Statistical Classification of  
29 Diseases and Related Health Problems 10th Revision (ICD-10).<sup>18</sup> Drugs were classified according to the  
30 WHO's Anatomical Therapeutic Chemical (ATC) classification system.<sup>19</sup>  
31  
32  
33  
34  
35  
36  
37  
38  
39  
40  
41

42 Intego started to collect data in 1994. Data were accumulated on a yearly basis and the number of  
43 participating general practices increased from 26 (i.e. 34 GPs) in 1999 to 48 (i.e. 111 GPs) in 2015.  
44 Since the start of the registration, hardly any GPs stopped collaboration with Intego.  
45  
46  
47

### 48 49 Data collection

50 For the present study, data over a 20-year time interval from 1 January 1996 to 31 December 2015 were  
51 used. In this period, 440,140 unique patients were registered in the Intego database. This study was  
52 reported in accordance with the RECORD checklist specific to observational studies using routinely  
53 collected health data.<sup>20</sup> Extracted data concerned data on prevalence, incidence, clinical characteristics  
54 of patients (e.g. comorbidity) and pharmacotherapy.  
55  
56  
57  
58  
59  
60

### Data on prevalence and incidence

The prevalence of a population is the proportion of the population with the disease at a specified time. Unlike incidence rates, which focus on new events, prevalence focuses on existing states. Because of the design of Intego (no episode registration and no recording of cure) prevalence rates could only be calculated on incurable chronic diseases, such as knee osteoarthritis.<sup>16</sup> Data for the first registration of prevalent diseases were routinely registered in Intego from 1994 and historically accumulated if registered in an earlier period.

Calculating disease prevalence requires both a numerator (number of persons with a disease) and a matching denominator (the ‘population at risk’ being studied). Determining primary care practice denominators is challenging.<sup>21</sup> The yearly contact group (YCG) is the set of patients with a visit noted in the electronic medical records during the past year. In this study, the YCG was used as denominator for all time trend analyses.<sup>22</sup>

### Data on comorbidity

Patients’ medical history before they presented with knee OA was registered for all cases between 1996 and 2015. A disease count was calculated for all incident cases with knee OA. For this disease count, a list of chronic diseases based on the paper by Knottnerus et al was used.<sup>23</sup> For the presence of chronic kidney disease (CKD), the glomerular filtration rate (GFR) was based on the closest creatinine measurement in the two years before or after presentation with knee OA diagnosis (Supplementary file 1: ICPC codes for diagnosis and comorbidity).

### Data on drug prescriptions

The prescription of medication for knee OA, including acetaminophen, oral and topical anti-inflammatory drugs, cox-2 selective anti-inflammatory drugs, weak and strong opioids, parenteral glucocorticoids, parenteral hyaluronic acid and glucosamine was extracted from Intego for all prevalent cases with knee OA (Supplementary file 2: used ACT codes). Prescription of medication was considered positive if it was prescribed at least once a year.

### Statistical analysis

Descriptive statistics, with frequency distribution and percentages, were used to measure the prevalence (/100 patients) and incidence (/1000 patient years at risk) of patients with knee OA. Data were stratified by gender and ten-year age cohorts, starting from 25 with 85 years and older as the last cohort. The rates were age-standardized by taking the Flemish population of the year 1996 as reference population.<sup>24</sup> Additionally, possible time trends were analysed in the age-standardized cohorts with joinpoint regression analysis.<sup>25</sup> Joinpoint analysis identifies the best-fitting point, where a statistically significant change (called the “joinpoint”) occurs, and determines the trends between joinpoints. Joinpoint regression allows us to identify the time point(s) of follow-up at which trends significantly change.<sup>26</sup> The annual percentage change (APC) is proposed to summarize and compare the rates of changes

1  
2  
3 between successive change points.<sup>27</sup> In the final model, the joinpoint analysis also provides an average  
4 annual percentage change (AAPC) as an average of APC estimates.<sup>27</sup> Analysis was performed with the  
5 Joinpoint Regression Program (version 3.5.3, released in May 2013 and available at  
6 <http://surveillance.cancer.gov/joinpoint>). This program starts with the minimum number of joinpoint  
7 (e.g. zero joinpoints, which is a straight line) and tests whether more joinpoints are statistically  
8 significant and must be added to the model. This enables the user to test that an apparent change in trend  
9 is statistically significant.  
10  
11  
12  
13

14  
15 Trends in the comorbidity profile for incident cases with knee OA were explored over four time intervals  
16 of five years (1996-2000, 2001-2005, 2006-2010 and 2011-2015) by the Cochran-Armitage test and the  
17 Jonckheere-Terpstra test. The Cochran-Armitage test for trend analysis is a modified Pearson's chi-  
18 square test to assess the association between binary and ordinal categories (e.g. between comorbidities  
19 and time intervals). The Jonckheere-Terpstra trend test was used to analyse trends for continuous  
20 variables (e.g. between age and time intervals).<sup>28</sup>  
21  
22  
23  
24

25 Over the same 20-year time period, trends in drug prescriptions for prevalent cases with knee OA were  
26 analyzed using joinpoint regression analysis, as described above. Two-sided p-values less than 0.05  
27 were considered to indicate statistical significance. Analyses were performed using R Software Version  
28 3.3.2 (Free Software Foundation Inc., Boston, MA, USA).  
29  
30  
31

### 32 Patient involvement

33 No patients were involved in defining the research question or the outcome measures, nor were they  
34 involved in the design and implementation of the study. There are no plans to involve patients in the  
35 dissemination of the results.  
36  
37  
38

## 39 Results

### 40 Demographic characteristics and trends in the prevalence and incidence of patients with 41 knee osteoarthritis (1996-2015)

42  
43  
44  
45 Between 1 January 1996 and 31 December 2015, the Intego database included data on 440,140 unique  
46 patients. Table 1 shows the demographic characteristics of the patients with knee OA by gender and age  
47 cohorts in Table 1. The age-standardized prevalence of knee OA increased by 79% from 1.99% in 1996  
48 to 3.56% in 2015 (AAPC= 2.5, 95%CI 2.2-2.9, Figure 1). Women have a higher prevalence than men  
49 do, but over the 20 years of the study men have a higher relative increase in prevalence (AAPC= 3.1,  
50 95%CI 2.7-3.5 for men versus AAPC= 2.4, 95%CI 2.0-2.7 for women). Figure 2 presents the observed  
51 and modeled long-term time trends in prevalence by gender. The age-standardized incidence of patients  
52 with knee OA remained stable with 4.23‰ in 1996 and 3.75‰ in 2015 (AAPC=-0.5, 95%CI -1.4-0.5),  
53 but showed a positive trend between 2006 and 2015 from 3.05‰ to 3.75‰, respectively (APC= 1.9,  
54  
55  
56  
57  
58  
59  
60



95%CI 0.4-3.5) (Figure 3). Between 2006 and 2015, this positive trend was higher for men (APC= 2.5, 95%CI 0.5-4.5) than for women (APC= 1.9, 95%CI 0.4-3.5) (Figure 3).

### Trends in comorbidity in newly diagnosed patients with knee osteoarthritis (1996-2015)

In the 20-year study period, the mean age at diagnosis of knee OA remained stable ( $p=0.384$ ) with 55.3 years in 1996 and 56.9 years in 2015, respectively, while a non-significant decline was found in the proportion of women in this period (65% to 62%,  $p=0.052$ ). Additionally, the disease burden was defined by calculating the mean disease count of patients with knee OA.<sup>23</sup> This mean disease count showed a significant increase in the study period ranging from 1.6 to 2.3 ( $p<0.001$ ), meaning that the comorbid burden of patients with knee OA increased. In this study, the following comorbidities increased significantly: the proportions of patients with diabetes (6% to 15%,  $p<0.001$ ), cardiovascular events (21% to 27%,  $p<0.001$ ), depression (9% to 13%,  $p=0.009$ ) and obesity (5% to 8%,  $p<0.001$ ). Hypertension, gastro-intestinal ulcer and renal failure remained stable. Additionally, we noted that the proportion of knee OA patients with cancer (2% to 3%,  $p<0.001$ ), asthma (8% to 17%,  $p<0.001$ ) and substance abuse (0% to 2%,  $p<0.001$ ) increased significantly during the study period, while the proportion with osteoporosis remained stable (Table 2).

### Trends in prescriptions for patients with knee osteoarthritis (1996-2015)

The prescription of acetaminophen (AAPC= 6.7, 95%CI 5.6-7.7), weak opioids (AAPC= 4.0, 95%CI 0.9-7.3) and glucosamine (AAPC= 8.6, 95%CI 2.4-15.1) for patients with knee OA increased during the study period (Table 3). The prevalence of patients with knee OA who were prescribed acetaminophen was lower than those with oral NSAIDs (19.2% versus 29.4% in 2015; 5.3% versus 28.4% in 1996). The prescription of oral, topical and cox-2 selective NSAIDs remained stable for both genders during the study period. The use of strong opioids showed a strong increase between 1996 and 2003 (AAPC= 9.0, 95%CI 2.5-16), but then decreased slightly in the period from 2003 to 2015 (AAPC= -2.0, 95%CI 3.7 to -0.3).

## Discussion

This study presents estimates of knee OA prevalence and incidence based on a large morbidity registration network for general practice in Belgium. During the 20-year study period, the age-standardized prevalence of knee OA significantly increased while the age-standardized incidence rate remained stable. During the study period, patients with knee OA suffered from more comorbidities, as shown by almost a doubling of the disease count. Oral NSAIDs were most frequently prescribed for the prevalent patients with knee OA, while prescription of acetaminophen, weak opioids and glucosamine showed an overall positive trend.

This study shows that the prevalence rate of knee OA significantly increased even after standardization of the study population. General practice morbidity registration networks in other European countries

1  
2  
3 show similar rates for knee OA: in the Netherlands, an overall prevalence of 3.4% and incidence of  
4 3.2‰ was registered in 2016.<sup>29</sup> In our study, we found similar rates with 3.56% and 3.75‰ respectively  
5 for the year 2015. In the UK, the estimated proportion of people who sought treatment for knee OA is  
6 high: 18% of the population aged 45 and over consulted their GP for knee OA.<sup>30</sup> In our study, we found  
7 a consultation prevalence of 21% for the same reference year (2010) and age cohorts. The latter study  
8 also found that OA is the most common musculoskeletal condition in older people and that just over  
9 half of all patients consulting their GP about OA have knee OA. In the near future, the number of people  
10 with knee OA is expected to rise considerably because of an aging population and obesity trends.<sup>31</sup>  
11 Nevertheless, the increasing prevalence of knee OA in general practice registration could also be  
12 attributed to other factors, for example: better access to general practice, more awareness of the public  
13 of preventive medicine, better diagnostics, better registration and higher demands and expectations of  
14 older people to remain physically active. Future qualitative research with different stakeholders could  
15 assess these possible explanations.  
16  
17

18  
19  
20  
21  
22  
23  
24 Osteoarthritis is one of the diseases with the highest rate of comorbidity, with reported rates of 68% to  
25 85%.<sup>13 14</sup> Diseases that frequently occur next to OA are diabetes, hypertension, atherosclerotic heart  
26 disease, overweight, and back pain.<sup>32</sup> Coexisting disorders may worsen pain and bring additional  
27 impairments, which necessitate adaptations to the conservative management of knee OA.<sup>33 34</sup> In our  
28 study, knee OA was also strongly associated with the following comorbidities: asthma, cancer,  
29 depression and substance abuse. The substantial contribution of OA to multi-morbidity and frailty  
30 should be recognized, further investigated, and needs extra attention in general practice management of  
31 long-term conditions.  
32  
33

34  
35  
36  
37 Pharmacological management of knee OA in general practice is dominated both by acetaminophen and  
38 by NSAIDs, as they are both recommended in evidence-based guidelines.<sup>5-8</sup> In our study, NSAIDs were  
39 the most frequently prescribed pain drug for prevalent patients with knee OA. Verkleij et al. observed  
40 the effects of medication on 104 patients with knee OA in general practice. They demonstrated no  
41 significant difference regarding knee pain and knee function between patients taking diclofenac or  
42 acetaminophen.<sup>35</sup> If acetaminophen should remain the ‘‘first-line’’ treatment for patients with a new  
43 episode, the effects of acetaminophen and the role in patients with comorbidities should be further  
44 investigated.<sup>36</sup>  
45  
46  
47  
48  
49

## 50 51 **Strengths and limitations**

52  
53 The major strengths of this study are the long-term follow-up data of a practice-based morbidity  
54 registration network in general practice. Intego covers more than 2% of the Flemish population, highly  
55 representative for age and gender. Longitudinal data in registry-based studies are used to track the  
56 natural history of diseases over time and enable us to perform time-to-event analyses. A few limitations  
57 must also be considered. Lack of data verification is a common problem in registry-based studies with  
58  
59  
60

1  
2  
3 longitudinal data of large sample size. In Intego, the lack of data verification and misclassification is  
4 minimalised because new diagnoses are automatically linked to ICPC-2 and ICD-10 codes with a  
5 detailed thesaurus, individual patients are followed over time and their history is taken into account. If  
6 diagnoses are not mutually exclusive, then they count for one. Secondly, we are aware that accurate  
7 coding is always a risk for possible underdiagnosis. The difference between early-onset knee OA and  
8 chronic, established knee OA can not be established with the ICPC codes. Standardized coding for OA  
9 should be adopted in general practice to accurately describe the extent of the condition and to maximize  
10 the conservative management options to improve quality of life. Furthermore, there is no obligation for  
11 patients to be registered with a particular GP in Belgium. Therefore, it can be difficult to define ‘the  
12 population at risk’ for epidemiological studies in general practice. In Intego, the YCG was used as  
13 denominator for all trend analyses. Importantly, mortality data are lacking in Intego. Therefore, patients  
14 in the incidence analysis are considered at risk until the diagnosis or until December 31 of any specific  
15 year to compensate for possible overestimation in this registry-based study. Finally, obesity could not  
16 be reliably assessed from the Intego database, because of insufficient registration of up-to-date weight  
17 and height in medical health records. Quality improvement initiatives should make GPs more aware of  
18 the necessity of properly recording up-to-date patient variables, such as BMI, in the EHR because of  
19 their growing importance in patient-tailored management strategies. Patient portals and remote access  
20 to their own medical health record are future initiatives, where the patient could play a more central role  
21 to help the GP in keeping these parameters more up-to-date by shared responsibility.<sup>37</sup>

## 22 23 24 25 26 27 28 29 30 31 32 33 34 35 36 37 38 39 40 41 42 43 44 45 46 47 48 49 50 51 52 53 54 55 56 57 58 59 60

In conclusion, increased prevalence, comorbidity, and number of drug prescriptions, together with the young age at incidence, confirm the high burden of knee OA. Our registry-based study represents knee OA diagnoses at a time it becomes a health issue for patients. Professionals face more difficulties in their conservative management options due to rising comorbidity. In future, these health trends can be used to prioritize initiatives for improvement in care.

## Acknowledgements

The authors would like to thank all the participating general practitioners.

## References

1. Murray CJ, Vos T, Lozano R, et al. Disability-adjusted life years (DALYs) for 291 diseases and injuries in 21 regions, 1990-2010: a systematic analysis for the Global Burden of Disease Study 2010. *Lancet* 2012;380(9859):2197-223. doi: 10.1016/S0140-6736(12)61689-4
2. Vos T, Flaxman AD, Naghavi M, et al. Years lived with disability (YLDs) for 1160 sequelae of 289 diseases and injuries 1990-2010: a systematic analysis for the Global Burden of Disease Study 2010. *Lancet* 2012;380(9859):2163-96. doi: 10.1016/S0140-6736(12)61729-2

3. Litwic A, Edwards MH, Dennison EM, et al. Epidemiology and burden of osteoarthritis. *Br Med Bull* 2013;105:185-99. doi: 10.1093/bmb/lds038
4. Bedson J, Jordan K, Croft P. The prevalence and history of knee osteoarthritis in general practice: a case-control study. *Fam Pract* 2005;22(1):103-8. doi: 10.1093/fampra/cmh700 [published Online First: 2005/01/11]
5. McAlindon TE, Bannuru RR, Sullivan MC, et al. OARSI guidelines for the non-surgical management of knee osteoarthritis. *Osteoarthritis Cartilage* 2014;22(3):363-88. doi: 10.1016/j.joca.2014.01.003 [published Online First: 2014/01/28]
6. Hochberg MC, Altman RD, April KT, et al. American College of Rheumatology 2012 recommendations for the use of nonpharmacologic and pharmacologic therapies in osteoarthritis of the hand, hip, and knee. *Arthritis Care Res (Hoboken)* 2012;64(4):465-74. [published Online First: 2012/05/09]
7. Kingsbury SR, Gross HJ, Isherwood G, et al. Osteoarthritis in Europe: impact on health status, work productivity and use of pharmacotherapies in five European countries. *Rheumatology (Oxford)* 2014;53(5):937-47. doi: 10.1093/rheumatology/ket463 [published Online First: 2014/02/04]
8. Fernandes L, Hagen KB, Bijlsma JW, et al. EULAR recommendations for the non-pharmacological core management of hip and knee osteoarthritis. *Ann Rheum Dis* 2013;72(7):1125-35. doi: 10.1136/annrheumdis-2012-202745 [published Online First: 2013/04/19]
9. Machado GC, Maher CG, Ferreira PH, et al. Efficacy and safety of paracetamol for spinal pain and osteoarthritis: systematic review and meta-analysis of randomised placebo controlled trials. *Bmj* 2015;350:h1225. doi: 10.1136/bmj.h1225 [published Online First: 2015/04/02]
10. Harding PA, Holland AE, Hinman RS, et al. Physical activity perceptions and beliefs following total hip and knee arthroplasty: a qualitative study. *Physiother Theory Pract* 2015;31(2):107-13. doi: 10.3109/09593985.2014.959581 [published Online First: 2014/12/17]
11. National Institute for Health and Care Excellence (NICE): Osteoarthritis: care and management (quality standard 87).2019 <http://guidance.nice.org.uk/qs87>
12. de Rooij M, Steultjens MPM, Avezaat E, et al. Restrictions and contraindications for exercise therapy in patients with hip and knee osteoarthritis and comorbidity. *Physical Therapy Reviews* 2013;18(2):101-11. doi: 10.1179/1743288X12Y.0000000056
13. van Dijk GM, Veenhof C, Schellevis F, et al. Comorbidity, limitations in activities and pain in patients with osteoarthritis of the hip or knee. *BMC Musculoskelet Disord* 2008;9:95. doi: 10.1186/1471-2474-9-95 [published Online First: 2008/06/28]
14. de Rooij M, van der Leeden M, Cheung J, et al. Efficacy of Tailored Exercise Therapy on Physical Functioning in Patients With Knee Osteoarthritis and Comorbidity: A Randomized Controlled Trial. *Arthritis Care Res (Hoboken)* 2017;69(6):807-16. doi: 10.1002/acr.23013 [published Online First: 2016/08/27]
15. Trotter JP. Patient registries: a new gold standard for "real world" research. *Ochsner J* 2002;4(4):211-4. [published Online First: 2002/10/01]
16. Truyers C, Goderis G, Dewitte H, et al. The Intego database: background, methods and basic results of a Flemish general practice-based continuous morbidity registration project. *BMC Med Inform Decis Mak* 2014;14:48. doi: 10.1186/1472-6947-14-48 [published Online First: 2014/06/08]

17. Vanbeselaere V, Truyers C, Elli S, et al. Association between atrial fibrillation, anticoagulation, risk of cerebrovascular events and multimorbidity in general practice: a registry-based study. *BMC Cardiovasc Disord* 2016;16:61. doi: 10.1186/s12872-016-0235-1 [published Online First: 2016/03/30]
18. Okkes IM, Becker HW, Bernstein RM, et al. The March 2002 update of the electronic version of ICPC-2. A step forward to the use of ICD-10 as a nomenclature and a terminology for ICPC-2. *Fam Pract* 2002;19(5):543-6. [published Online First: 2002/10/03]
19. WHO Collaborating Centre for Drug Statistics Methodology: ATC/DDD Index 2010. [http://www.whocc.no/atc\\_ddd\\_index](http://www.whocc.no/atc_ddd_index)
20. Benchimol EI, Smeeth L, Guttman A, et al. The REporting of studies Conducted using Observational Routinely-collected health Data (RECORD) statement. *PLoS Med* 2015;12(10):e1001885. doi: 10.1371/journal.pmed.1001885 [published Online First: 2015/10/07]
21. Greiver M, Williamson T, Bennett TL, et al. Developing a method to estimate practice denominators for a national Canadian electronic medical record database. *Fam Pract* 2013;30(3):347-54. doi: 10.1093/fampra/cms083 [published Online First: 2013/01/12]
22. Bartholomeeusen S, Kim CY, Mertens R, et al. The denominator in general practice, a new approach from the Intego database. *Fam Pract* 2005;22(4):442-7. doi: 10.1093/fampra/emi054 [published Online First: 2005/06/21]
23. Knottnerus JA, Metsemakers J, Hoppener P, et al. Chronic illness in the community and the concept of 'social prevalence'. *Fam Pract* 1992;9(1):15-21. [published Online First: 1992/03/01]
24. Truyens C, Elli S, Goderis G, et al. [Dutch: 20 year General Practice in Flanders (1994-2013)]. Leuven: Acco, 2015. ISBN978-94-6292-129-0.
25. Kim HJ, Fay MP, Feuer EJ, et al. Permutation tests for joinpoint regression with applications to cancer rates. *Stat Med* 2000;19(3):335-51. [published Online First: 2000/01/29]
26. Rea F, Pagan E, Compagnoni M, et al. Joinpoint regression analysis with time-on-study as time-scale. Application to three Italian population-based cohort studies. *Epidemiology Biostatistics and Public Health* 2017;14(3):e12616:1-8.
27. Clegg LX, Hankey BF, Tiwari R, et al. Estimating average annual per cent change in trend analysis. *Stat Med* 2009;28(29):3670-82. doi: 10.1002/sim.3733 [published Online First: 2009/10/27]
28. Alan A. Categorical data analysis. 2nd ed: Wiley 2002.
29. Nivel database for primary care morbidity registration in the Netherlands. 2019 <https://www.nivel.nl/nl/>
30. Osteoarthritis in general practice: data and perspectives. 2013 [www.arthritisresearchuk.org](http://www.arthritisresearchuk.org)
31. Cross M, Smith E, Hoy D, et al. The global burden of hip and knee osteoarthritis: estimates from the global burden of disease 2010 study. *Ann Rheum Dis* 2014;73(7):1323-30. doi: 10.1136/annrheumdis-2013-204763 [published Online First: 2014/02/21]
32. Tuominen U, Blom M, Hirvonen J, et al. The effect of co-morbidities on health-related quality of life in patients placed on the waiting list for total joint replacement. *Health Qual Life Outcomes* 2007;5:16. doi: 10.1186/1477-7525-5-16 [published Online First: 2007/03/17]

1  
2  
3 33. Reeuwijk KG, de Rooij M, van Dijk GM, et al. Osteoarthritis of the hip or knee: which coexisting  
4 disorders are disabling? *Clin Rheumatol* 2010;29(7):739-47. doi: 10.1007/s10067-010-1392-8  
5 [published Online First: 2010/02/24]  
6

7 34. Calders P, Van Ginckel A. Presence of comorbidities and prognosis of clinical symptoms in knee  
8 and/or hip osteoarthritis: A systematic review and meta-analysis. *Semin Arthritis Rheum*  
9 2018;47(6):805-13. doi: 10.1016/j.semarthrit.2017.10.016 [published Online First: 2017/11/22]  
10

11 35. Verkleij SP, Luijsterburg PA, Willemsen SP, et al. Effectiveness of diclofenac versus paracetamol  
12 in knee osteoarthritis: a randomised controlled trial in primary care. *Br J Gen Pract*  
13 2015;65(637):e530-7. doi: 10.3399/bjgp15X686101 [published Online First: 2015/07/28]  
14

15 36. Conaghan PG. NSAIDs or paracetamol for short-term treatment of mild to moderate knee pain in  
16 early osteoarthritis: are they equivalent? *Evid Based Med* 2016;21(1):14. doi: 10.1136/ebmed-2015-  
17 110289 [published Online First: 2015/10/21]  
18

19 37. Alpert JM, Krist AH, Aycock RA, et al. Designing User-Centric Patient Portals: Clinician and  
20 Patients' Uses and Gratifications. *Telemed J E Health* 2017;23(3):248-53. doi: 10.1089/tmj.2016.0096  
21 [published Online First: 2016/06/23]  
22  
23

## 24 Footnotes

25  
26  
27 **Contributors:** PM and DS performed the analyses, and DS, PV, RH, MS, FL, BV wrote the manuscript.  
28 DS, MS and BV are responsible for the study concept, design, the recruitment of subjects and acquisition  
29 of data. All authors participated in the interpretation of the data. All authors approved the final version  
30 of the manuscript.  
31

32  
33  
34 **Funding:** Intego is funded on a regular basis by the Flemish Government (Ministry of Health and  
35 Welfare). This work would not have been possible without the collaboration of all general practitioners  
36 of the Intego network. We hereby state the independence of the researchers from the funders.  
37

38  
39  
40 **Disclaimer:** The funders had no role in the study design, data collection and analysis, decision to publish  
41 or preparation of the manuscript  
42

43  
44 **Competing interests:** None declared.

45  
46  
47 **Ethics approval:** The Intego project was presented to the Belgian Privacy Commission (no  
48 SCSZG/13/079) and approved by the ethical review board of the Medical School of the Catholic  
49 University of Leuven (N° ML 1723).  
50

51  
52  
53 **Data sharing statement:** All authors had full access to all data (including statistical reports and tables)  
54 in the study and assume responsibility for the integrity of the data and the accuracy of the data analyses.

55  
56  
57 **Availability of data and materials:** The dataset supporting the conclusions of this article is held at the  
58 University of Leuven, Belgium, and can be shared upon contacting the corresponding author.  
59  
60

## Figure legends

1. Figure 1. The standardized and non-standardized prevalence of patients with knee osteoarthritis by age cohorts in the Intego registry (1996-2015).
2. Figure 2. An overview of the observed and modeled trends in prevalence for men and women in the Intego registry (1996-2015). Observed (bullets) and modeled (trend line) age-standardized average annual percentage change (AAPC) in prevalence with 95% confidence intervals for time trends for patients with knee osteoarthritis in Intego register, 1996–2015. The AAPC is significantly different from zero at  $\alpha = 0.05$ .
3. Figure 3. The standardized and non-standardized incidence of patients with knee osteoarthritis in the Intego registry (1996-2015).

## Supplementary file list

1. Supplementary file 1. ICPC codes and description of codes for the disease count.
2. Supplementary file 2. ACT coding for pharmacological agents used in the management of knee osteoarthritis.
3. Supplementary file 3. Demographic characteristics of patients with knee osteoarthritis in Intego registry (1996-2015).
4. The Record checklist.

Table 1. Demographic characteristics and long-term trends in prevalence and incidence of patients with knee osteoarthritis in Intego registry (1996-2015).

|                                  | Year<br>1996* | Year<br>2015* | Overall<br>trend***       | Trend 1       |                             | Trend 2       |                           | Trend<br>3    |                             |
|----------------------------------|---------------|---------------|---------------------------|---------------|-----------------------------|---------------|---------------------------|---------------|-----------------------------|
|                                  | %             | %             | AAPC<br>[95% CI]          | Years         | APC<br>[95% CI]             | Years         | APC<br>[95% CI]           | Years         | APC<br>[95% CI]             |
| <b>Prevalence</b>                |               |               |                           |               |                             |               |                           |               |                             |
| <b>Total</b>                     | 1.99          | 3.56          | <b>2.5</b><br>[2.2;2.9]   | 1996-<br>2015 | <b>2.5</b><br>[2.2;2.9]     |               |                           |               |                             |
| <b>Men</b>                       | 1.32          | 2.59          | <b>3.1</b><br>[2.7;3.5]   | 1996-<br>2015 | <b>3.1</b><br>[2.7;3.5]     |               |                           |               |                             |
| <b>Women</b>                     | 2.64          | 4.55          | <b>2.4</b><br>[2.0;2.7]   | 1996-<br>2015 | <b>2.4</b><br>[2.0;2.7]     |               |                           |               |                             |
| <b>Prevalence by age group**</b> |               |               |                           |               |                             |               |                           |               |                             |
| <b>25-34</b>                     | 0.68          | 1.82          | <b>4.7</b><br>[3.7;5.6]   | 1996-<br>2007 | <b>7.7</b><br>[6.4;9.1]     | 2007-<br>2015 | <b>0.6</b><br>[-0.9;2.1]  |               |                             |
| <b>35-44</b>                     | 0.70          | 2.21          | <b>5.5</b><br>[4.3;6.7]   | 1996-<br>2011 | <b>4.5</b><br>[3.6;5.4]     | 2011-<br>2015 | <b>9.5</b><br>[4.3;15.0]  |               |                             |
| <b>45-54</b>                     | 1.55          | 3.14          | <b>4.0</b><br>[3.3;4.8]   | 1996-<br>2011 | <b>3.4</b><br>[2.8;4.0]     | 2011-<br>2015 | <b>6.5</b><br>[3.2;10.0]  |               |                             |
| <b>55-64</b>                     | 2.96          | 5.60          | <b>3.0</b><br>[2.6;3.4]   | 1996-<br>2015 | <b>3.0</b><br>[2.6;3.4]     |               |                           |               |                             |
| <b>65-74</b>                     | 6.08          | 8.97          | <b>1.7</b><br>[1.3;2.2]   | 1996-<br>2015 | <b>1.7</b><br>[1.3;2.2]     |               |                           |               |                             |
| <b>75-84</b>                     | 7.80          | 13.9          | <b>2.6</b><br>[2.0;3.2]   | 1996-<br>2007 | <b>3.6</b><br>[2.7;4.5]     | 2007-<br>2015 | <b>1.2</b><br>[0.2;2.1]   |               |                             |
| <b>≥ 85</b>                      | 6.27          | 15.0          | <b>3.0</b><br>[2.4;3.5]   | 1996-<br>2015 | <b>3.0</b><br>[2.4;3.5]     |               |                           |               |                             |
| <b>Incidence</b>                 |               |               |                           |               |                             |               |                           |               |                             |
| <b>Total</b>                     | 0.42          | 0.38          | <b>-0.5</b><br>[-1.4;0.5] | 1996-<br>2006 | <b>-2.6</b><br>[-4.0;-1.1]  | 2006-<br>2015 | <b>1.9</b><br>[0.4;3.5]   |               |                             |
| <b>Men</b>                       | 0.27          | 0.26          | <b>-0.2</b><br>[-1.4;1.1] | 1996-<br>2006 | <b>-2.5</b><br>[-4.4;-0.5]  | 2006-<br>2015 | <b>2.5</b><br>[0.5;4.5]   |               |                             |
| <b>Women</b>                     | 0.58          | 0.49          | <b>-0.5</b><br>[-2.4;1.4] | 1996-<br>1999 | <b>-8.7</b><br>[-16.2;-0.6] | 1999-<br>2013 | <b>-0.4</b><br>[-1.2;0.5] | 2013-<br>2015 | <b>11.8</b> [-<br>3.3;29.3] |

**Legend:**

AAPC, average annual percentage change; APC, annual percentage change; CI, confidence interval



1  
2  
3 \* These percentages are standardized for the total Flemish population.

4 \*\* Standardization was possible for the total population, but not for specific age cohorts.

5 \*\*\* Joinpoint regression modelling was used to estimate (A)APC in prevalence and incidence trends. Three possible trends were  
6 calculated during the 20-year study period.

7 **Statistically significant differences for (A)APC are indicated in bold.**  
8  
9  
10  
11  
12  
13  
14  
15  
16  
17  
18  
19  
20  
21  
22  
23  
24  
25  
26  
27  
28  
29  
30  
31  
32  
33  
34  
35  
36  
37  
38  
39  
40  
41  
42  
43  
44  
45  
46  
47  
48  
49  
50  
51  
52  
53  
54  
55  
56  
57  
58  
59  
60

For peer review only

Table 2. Trends in comorbidities for patients with knee osteoarthritis (1996-2015)

| Variables                      | 1996-2000   | 2001-2005   | 2006-2010   | 2011-2015*  | p-value<br>** |
|--------------------------------|-------------|-------------|-------------|-------------|---------------|
| <b>Mean age (± SD)</b>         | 55.3 (21.9) | 57.6 (20.5) | 57.8 (19.8) | 56.9 (19.8) | 0.384         |
| <b>Women, n (%)</b>            | 972 (65%)   | 1234 (65%)  | 1419 (64%)  | 1412 (62%)  | 0.05224       |
| <b>Incidence, n</b>            | 1503        | 1912        | 2202        | 2288        |               |
| <b>Comorbidities, n (%)</b>    |             |             |             |             |               |
| <b>Hypertension</b>            | 359 (24%)   | 485 (25%)   | 623 (28%)   | 593 (26%)   | 0.0756        |
| <b>Diabetes</b>                | 93 (6%)     | 161 (8%)    | 252 (11%)   | 346 (15%)   | <0.001        |
| <b>CV events</b>               | 323 (21%)   | 480 (25%)   | 597 (27%)   | 614 (27%)   | <0.001        |
| <b>GI complication (ulcer)</b> | 28 (2%)     | 60 (3%)     | 59 (3%)     | 61 (3%)     | 0.3585        |
| <b>Renal failure</b>           | 23 (2%)     | 70 (4%)     | 71 (3%)     | 66 (3%)     | 0.1025        |
| <b>Depression</b>              | 141 (9%)    | 230 (12%)   | 259 (12%)   | 287 (13%)   | 0.009         |
| <b>Obesity</b>                 | 74 (5%)     | 101 (5%)    | 145 (7%)    | 191 (8%)    | <0.001        |
| <b>Osteoporosis</b>            | 57 (4%)     | 81 (4%)     | 107 (5%)    | 103 (5%)    | 0.2303        |
| <b>Cancer</b>                  | 29 (2%)     | 60 (3%)     | 59 (3%)     | 61 (3%)     | <0.001        |
| <b>Asthma</b>                  | 125 (8%)    | 205 (11%)   | 328 (15%)   | 392 (17%)   | <0.001        |
| <b>Substance abuse</b>         | 4 (0%)      | 22 (1%)     | 31 (1%)     | 48 (2%)     | <0.001        |
| <b>Disease burden, n</b>       | 1.6267      | 1.8383      | 2.1848      | 2.3387      | <0.001        |

**Legend:**

\* four time intervals of five years were defined to evaluate trends for incident patients with knee osteoarthritis.

\*\* p-value for the comorbidities was calculated with the Cochran-Armitage trend test; p-value for age was calculated with the Jonckheere-Terpstra trend test.

Table 3. Medication use in patients with knee osteoarthritis in Intego registry (1996-2015).

| Group/<br>Medication                    | Prev. in |             | Summary<br>AAPC [95% CI]  | Trend 1   |                          | Trend 2   |                           | Trend 3   |                      |
|-----------------------------------------|----------|-------------|---------------------------|-----------|--------------------------|-----------|---------------------------|-----------|----------------------|
|                                         | 1996     | 2015        |                           | Years     | APC<br>[95% CI]          | Years     | APC<br>[95% CI]           | Years     | APC<br>[95% CI]      |
| <b>Acetaminophen</b>                    | 5.3      | 19.2        | <b>6.7 [5.6-7.7]</b>      | 1996-2010 | <b>8.0 [6.8-9.2]</b>     | 2010-2015 | <b>3.1 [0.3;5.9]</b>      |           |                      |
| Males                                   | 5.2      | 17.4        | <b>5.8 [4.9-6.6]</b>      |           |                          |           |                           |           |                      |
| Females                                 | 5.4      | <b>20.2</b> | <b>7.0 [5.8-8.3]</b>      | 1996-2010 | <b>8.7 [7.3;10.1]</b>    | 2010-2015 | 2.7 [-0.6;6.0]            |           |                      |
| <b>Oral NSAID<br/>(exclusion cox-2)</b> | 28.4     | 29.4        | 0.0 [-1.1;1.1]            | 1996-2002 | -1.0 [-3.5;1.6]          | 2002-2008 | 2.4 [-0.1;5.0]            | 2008-2015 | -1.2 [-2.4;0.1]      |
| Males                                   | 28.6     | 28.8        | 0.5 [-0.2;1.2]            | 1996-2009 | <b>1.1 [0.4;1.9]</b>     | 2009-2015 | 0.5 [-0.2;1.2]            |           |                      |
| Females                                 | 28.3     | 29.6        | 0.3 [-0.1;0.8]            |           |                          |           |                           |           |                      |
| <b>Cox-2 selective<br/>NSAID</b>        | 3.0      | 2.3         | -7.7 [-36.0; 33.0]        | 2000-2004 | -2.7 [-29.3;33.9]        | 2004-2007 | -48.4 [-93.5; 309.5]      | 2007-2015 | 11.8 [-3.4;29.5]     |
| Males                                   | 2.2      | 1.8         | <b>-13.3 [-19.3;-6.7]</b> |           |                          |           |                           |           |                      |
| Females                                 | 3.4      | 2.7         | -7.3 [-34.0;30.1]         | 2000-2004 | -3.3 [-29.1;32.0]        | 2004-2007 | -47.2 [-92.2; 257.6]      | 2007-2015 | 12.0 [-2.9;29.2]     |
| <b>Topical NSAID</b>                    | 7.8      | 5.9         | -1.0 [-2.4; 0.4]          | 1996-2003 | <b>-4.7 [-8.1;-1.2]</b>  | 2003-2015 | 1.2 [-0.0;2.4]            |           |                      |
| Males                                   | 9.3      | 5.8         | -0.9 [-2.2;0.5]           |           |                          |           |                           |           |                      |
| Females                                 | 7.1      | 5.9         | -0.8 [-2.3;0.7]           | 1996-2003 | <b>-4.3 [-8.0;-0.4]</b>  | 2003-2015 | 1.3 [-0.0;2.6]            |           |                      |
| <b>Weak opioids</b>                     | 2.8      | 6.1         | <b>4.0 [0.9;7.3]</b>      | 1996-1998 | <b>36.3 [0.4;85.2]</b>   | 1998-2009 | -0.9 [-2.3;0.5]           | 2009-2015 | <b>4.0 [1.6;6.4]</b> |
| Males                                   | 1.5      | 5.2         | <b>2.9 [1.5;4.4]</b>      |           |                          |           |                           |           |                      |
| Females                                 | 3.3      | 6.7         | 2.8 [-0.0;5.7]            | 1996-2000 | <b>14.7 [1.6;29.4]</b>   | 2000-2008 | -3.2 [-6.4;0.2]           | 2008-2015 | <b>3.5 [0.6;6.4]</b> |
| <b>Strong opioids</b>                   | 2.5      | 4.3         | 1.9 [-0.4;4.3]            | 1996-2003 | <b>9.0 [2.5;16.0]</b>    | 2003-2015 | <b>-2.0 [-3.7;-0.3]</b>   |           |                      |
| Males                                   | 1.7      | 3.6         | -0.2 [-2.0; 1.6]          |           |                          |           |                           |           |                      |
| Females                                 | 2.9      | 4.7         | <b>2.3 [0.3;4.3]</b>      | 1996-2003 | <b>10.0 [4.4;15.9]</b>   | 2003-2015 | <b>-2.0 [-3.4;-0.5]</b>   |           |                      |
| <b>Parenteral<br/>glucocorticoids</b>   | 9.1      | 8.1         | -0.7 [-1.8;0.5]           | 1996-2005 | <b>-2.1 [-3.5;-0.7]</b>  | 2005-2012 | <b>2.7 [0.8;4.7]</b>      | 2012-2015 | -4.1 [-9.2;1.2]      |
| Males                                   | 8.1      | 8.6         | <b>0.8 [0.0;1.6]</b>      |           |                          |           |                           |           |                      |
| Females                                 | 9.6      | 7.9         | <b>-1.3 [-2.6; 0.0]</b>   | 1996-2003 | <b>-3.8 [-6.0;-1.5]</b>  | 2003-2012 | <b>2.0 [0.6;3.4]</b>      | 2012-2015 | -5.1 [-10.7;0.8]     |
| <b>Glucosamine*</b>                     | 0.6      | 1.8         | <b>8.6 [2.4;15.1]</b>     | 2001-2004 | <b>64.1 [25.0;115.3]</b> | 2004-2011 | <b>-9.6 [-14.3;-4.4]</b>  | 2011-2015 | 9.8 [-0.6;21.2]      |
| Males                                   | 0.1      | 1.8         | 17.3 [-18.8; 69.5]        | 2001-2003 | 212.4 [-83.1;566.4.3]    | 2003-2015 | -0.4 [-4.8;4.2]           |           |                      |
| Females                                 | 0.9      | 1.8         | <b>6.8 [0.4;13.7]</b>     | 2001-2004 | <b>56.7 [18.3;107.5]</b> | 2004-2011 | <b>-10.0 [-15.3;-4.3]</b> | 2011-2015 | 8.2 [-3.6;21.4]      |

**Legend:**

AAPC, average annual percentage change; APC, annual percentage change; CI, confidence interval; Prev., prevalence

\*glucosamine: registration starts from 2001; cox-2 selective NSAID starts from 2000

**Bold:** indicates that the (A)APC is significantly different from zero at the alpha= 0.05 level

¥= three possible time trends were computed with the joinpoint regression analysis. The corresponding time cohorts and APC are mentioned in these three columns

Figure 1.

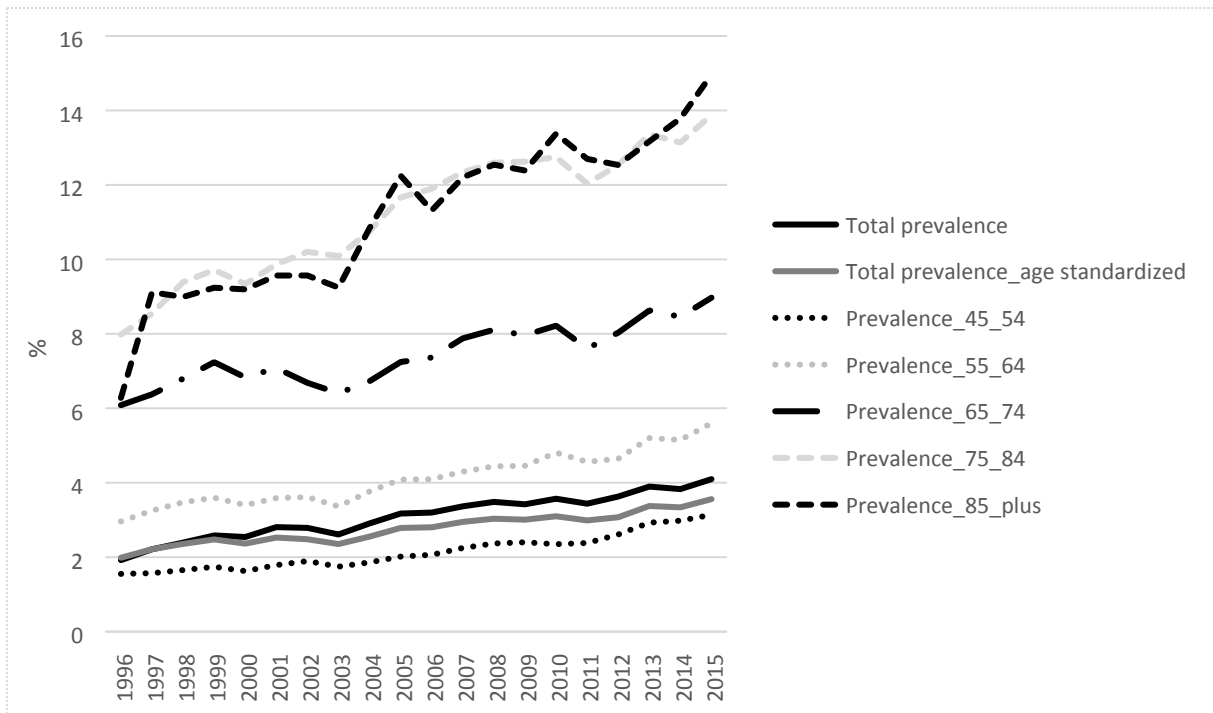

review only

Figure 2.

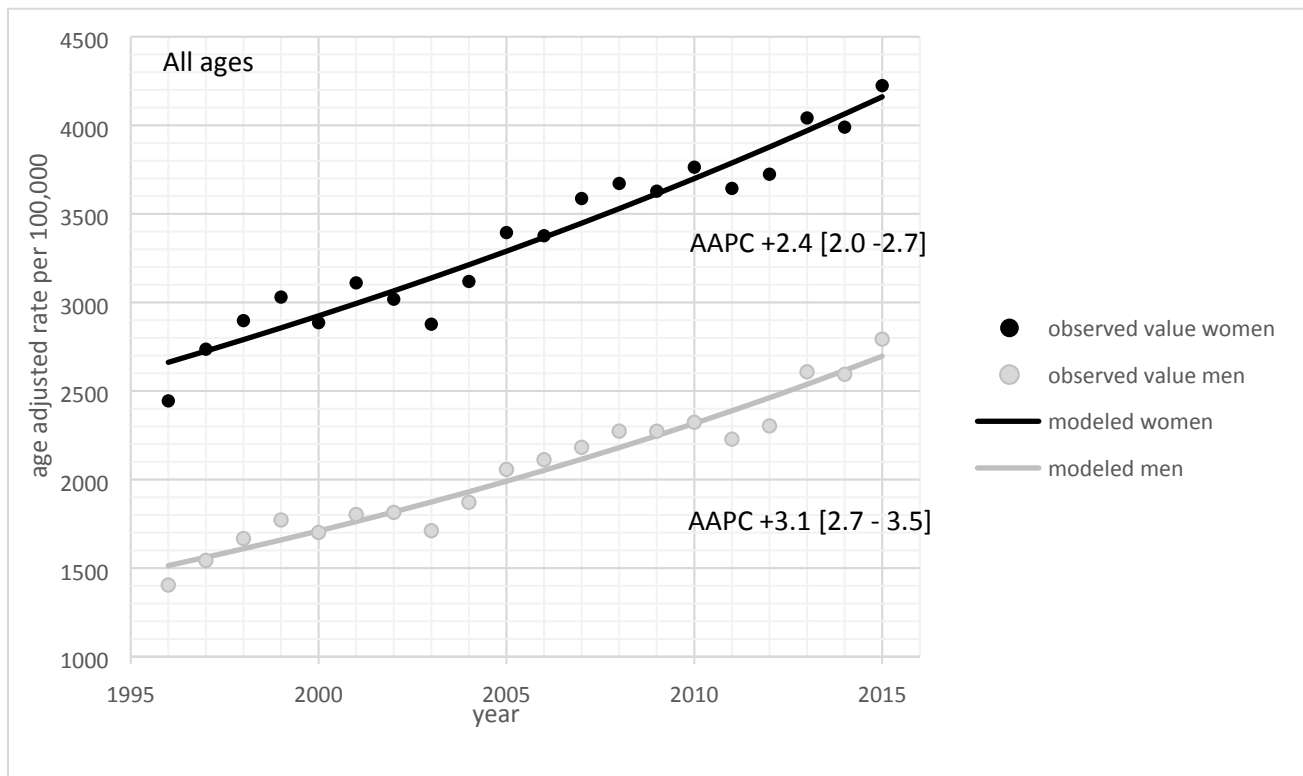

Figure 3.

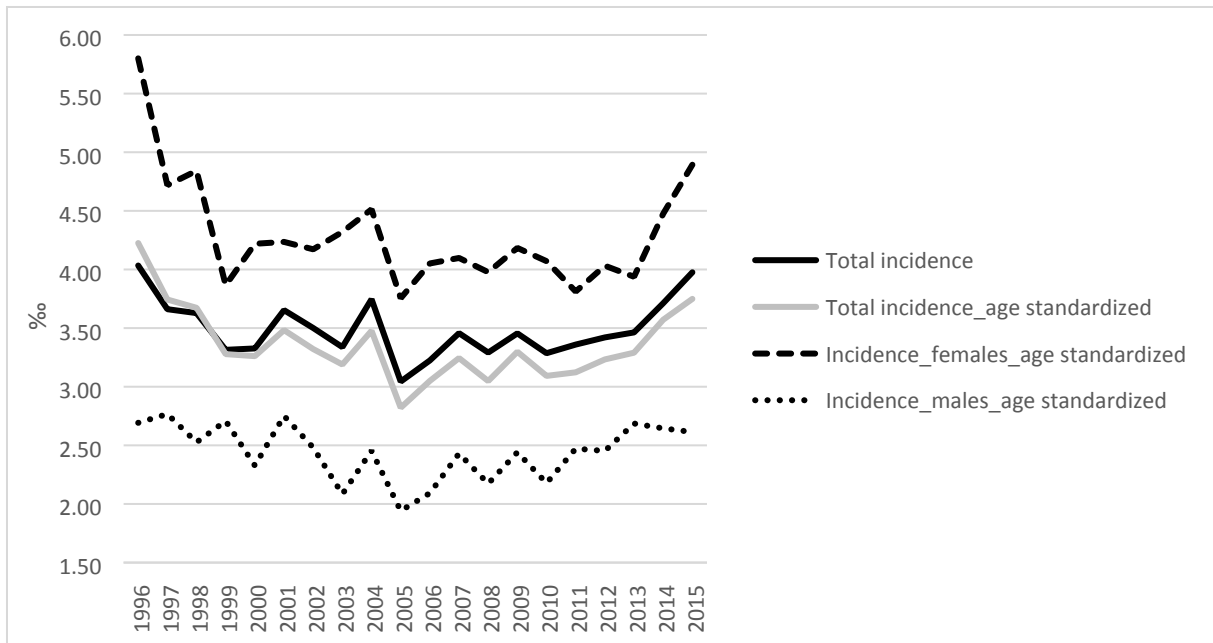

## SUPPLEMENT 1. ICPC codes and description of codes for the disease count

### Codes to measure the disease count

The combination of the following 92 ICPC-2 codes were used to measure the disease count. If codes are not mutually exclusive (e.g. T89 and T90), then they count for one.

| ICPC code | Description                        |
|-----------|------------------------------------|
| A79       | Malignancy NOS                     |
| A90       | Congenital anomaly OS/multiple     |
| B72       | Hodgkin's disease/lymphoma         |
| B73       | Leukaemia                          |
| B74       | Malignant neoplasm blood other     |
| B78       | Hereditary haemolytic anaemia      |
| B83       | Purpura/coagulation defect         |
| B90       | HIV-infection/aids                 |
| D74       | Malignant neoplasm stomach         |
| D75       | Malignant neoplasm colon/rectum    |
| D76       | Malignant neoplasm pancreas        |
| D77       | Malig. neoplasm digest other/NOS   |
| F83       | Retinopathy                        |
| F84       | Macular degeneration               |
| F94       | Blindness                          |
| H83       | Otosclerosis                       |
| H84       | Presbycusis                        |
| H86       | Deafness                           |
| K74       | Ischaemic heart disease w. angina  |
| K75       | Acute myocardial infarction        |
| K76       | Ischaemic heart disease w/o angina |
| K77       | Heart failure                      |
| K82       | Pulmonary heart disease            |
| K86       | Hypertension uncomplicated         |
| K87       | Hypertension complicated           |
| K90       | Stroke/cerebrovascular accident    |
| K91       | Cerebrovascular disease            |
| K92       | Atherosclerosis/PVD                |
| K93       | Pulmonary embolism                 |
| K94       | Phlebitis/thrombophlebitis         |
| L84       | Back syndrome w/o radiating pain   |
| L85       | Acquired deformity of spine        |
| L88       | Reumatoide arthritis               |
| L89       | Osteoarthrosis of hip              |
| L90       | Osteoarthrosis of knee             |
| L91       | Osteoarthrosis other               |
| L95       | Osteoporosis                       |
| L98       | Acquired deformity of limb         |
| N70       | Poliomyelitis                      |
| N74       | Malignant neoplasm nervous system  |
| N85       | Congenital anomaly neurological    |

|     |                                       |
|-----|---------------------------------------|
| N86 | Multiple sclerosis                    |
| N87 | Parkinsonism                          |
| N88 | Epilepsy                              |
| N89 | Migraine                              |
| N90 | Cluster headache                      |
| N92 | Trigeminal neuralgia                  |
| P15 | Substance abuse: chronic alcohol      |
| P28 | Limited function/disability (p)       |
| P70 | Dementia                              |
| P71 | Organic psychosis other               |
| P72 | Schizophrenia                         |
| P73 | Affective psychosis                   |
| P74 | Anxiety disorder/anxiety state        |
| P75 | Somatization disorder                 |
| P76 | Depressive disorder                   |
| P77 | Suicide/suicide attempt               |
| P79 | Phobia/compulsive disorder            |
| P80 | Personality disorder                  |
| P85 | Mental retardation                    |
| P98 | Psychosis NOS/other                   |
| R79 | Chronic bronchitis                    |
| R84 | Malignant neoplasm bronchus/lung      |
| R85 | Malignant neoplasm respiratory, other |
| R95 | Chronic obstructive pulmonary disease |
| R96 | Asthma                                |
| S77 | Malignant neoplasm of skin            |
| S87 | Dermatitis/atopic eczema              |
| S91 | Psoriasis                             |
| S97 | Chronic ulcer skin                    |
| T71 | Malignant neoplasm thyroid            |
| T80 | Congenital anom endocrine/metab.      |
| T85 | Hyperthyroidism/thyrotoxicosis        |
| T86 | Hypothyroidism/myxoedema              |
| T89 | Diabetes insulin dependent            |
| T90 | Diabetes non-insulin dependent        |
| T92 | Gout                                  |
| T93 | Lipid disorder                        |
| T99 | Endocrine/metab/nutrit. dis. other    |
| U04 | Incontinence urine                    |
| U75 | Malignant neoplasm of kidney          |
| U76 | Malignant neoplasm of bladder         |
| U77 | Malignant neoplasm urinary other      |
| U85 | Congenital anomaly urinary tract      |
| U88 | Glomerulonephritis/nephrosis          |
| W72 | Malignant neoplasm relate to preg.    |
| X75 | Malignant neoplasm cervix             |
| X76 | Malignant neoplasm breast female      |
| X77 | Malignant neoplasm genital other (f)  |
| Y77 | Malignant neoplasm prostate           |
| Y78 | Malign neoplasm male genital other    |
| Y85 | Benign prostatic hypertrophy          |



### Other ICPC codes used in this manuscript

| ICPC code | description                                             |
|-----------|---------------------------------------------------------|
| P17       | Substance abuse: tobacco                                |
| P19       | Substance abuse: drug abuse                             |
| L89       | Osteoarthritis of the hip                               |
| L90       | Osteoarthritis of the knee                              |
| L91       | Osteoarthritis of other locations (other than knee/hip) |

### ICPC codes used with Intego software to define comorbidity

#### Definition of cancer

Intego uses a set of 22 ICPC-2 codes to define cancer as a comorbidity: A79, B73, B72, B74, D74, D75, D76, D77, L71, N74, R84, R85, T71, U75, U76, U77, W72, X75, X76, X77, Y77, and Y78.

#### Definition of substance abuse

Intego uses a combination of three ICPC-2 codes to define substance abuse: P15, P 17, and P19.

Supplement 2. ACT coding for pharmacological agents used in the management of knee osteoarthritis.

|                                        | <b>ACT coding</b>                                                                                                     |
|----------------------------------------|-----------------------------------------------------------------------------------------------------------------------|
| Acetaminophen                          | N02BE01                                                                                                               |
| Oral NSAID (exclusion cox-2 selective) | M01AB<br>M01AC-M01AE<br>M01AG                                                                                         |
| COX-2 selective NSAID                  | M01AH                                                                                                                 |
| Topical NSAID                          | M02AA                                                                                                                 |
| Glucosamine supplements                | M01AX05                                                                                                               |
| Chondroitin supplements                | M01AX25                                                                                                               |
| Hyaluronic acid                        | M09AX01                                                                                                               |
| Weak opioids                           | N02AX02<br>N02AJ01<br>N02AJ02<br>N02AJ03<br>N02AJ06<br>N02AJ07<br>N02AJ08<br>N02AJ09<br>N02AJ13<br>N02AJ14<br>N02AJ15 |
| Strong opioids                         | N02AA<br>N02AB<br>N02AC<br>N02AD<br>N02AE<br>N02AF                                                                    |
| Glucocorticoids                        | H02AB                                                                                                                 |

### Supplement 3. Demographic characteristics of patients with knee osteoarthritis in Intego registry (1996-2015).

|                                          | 1996***     |                                                 | 2005        |                                                 | 2015        |                                                 |
|------------------------------------------|-------------|-------------------------------------------------|-------------|-------------------------------------------------|-------------|-------------------------------------------------|
|                                          | n/N         | %<br>Non-<br>standardized<br>vs<br>standardized | n/N         | %<br>Non-<br>standardized<br>vs<br>standardized | n/N         | %<br>Non-<br>standardized<br>vs<br>standardized |
| <b>Prevalence,<br/>gender</b>            |             |                                                 |             |                                                 |             |                                                 |
| <b>Total</b>                             | 1.595/83011 | 1.92; 1.99                                      | 4069/128251 | 3.17;2.79                                       | 5049/123261 | 4.09; 3.56                                      |
| <b>Men</b>                               | 518/39648   | 1.31; 1.32                                      | 1348/61446  | 2.20;1.97                                       | 1817/58841  | 3.09; 2.59                                      |
| <b>Women</b>                             | 1077/43363  | 2.48; 2.64                                      | 2721/66805  | 4.07;3.67                                       | 3232/64420  | 5.02;4.55                                       |
| <b>Prevalence,<br/>age<br/>cohorts**</b> |             |                                                 |             |                                                 |             |                                                 |
| <b>25-34</b>                             | 101         | 0.68                                            | 272         | 1.55                                            | 324         | 1.82                                            |
| <b>35-44</b>                             | 98          | 0.70                                            | 225         | 1.18                                            | 353         | 2.22                                            |
| <b>45-54</b>                             | 155         | 1.55                                            | 372         | 2.01                                            | 532         | 3.13                                            |
| <b>55-64</b>                             | 240         | 2.96                                            | 606         | 4.08                                            | 863         | 5.60                                            |
| <b>65-74</b>                             | 442         | 6.08                                            | 887         | 7.24                                            | 1002        | 9.00                                            |
| <b>75-84</b>                             | 303         | 7.98                                            | 1038        | 11.66                                           | 1130        | 13.9                                            |
| <b>≥ 85</b>                              | 84          | 6.28                                            | 362         | 12.24                                           | 613         | 15.0                                            |
| <b>Incidence,<br/>gender</b>             |             |                                                 |             |                                                 |             |                                                 |
| <b>Total</b>                             | 325/81416   | 0.40; 0.42                                      | 378/124182  | 0.30;0.28                                       | 470/118212  | 0.40; 0.38                                      |
| <b>Men</b>                               | 102/39130   | 0.26; 0.27                                      | 129/60098   | 0.21;0.19                                       | 167/57024   | 0.29; 0.26                                      |
| <b>Women</b>                             | 223/42286   | 0.53; 0.58                                      | 249/64084   | 0.39;0.38                                       | 303/61188   | 0.50;0.49                                       |

**Legend:**

**N=**yearly contact group: the number of patients that visited their general practitioner at least once during once year

\*the first % refers to the age-specific data from the Intego register; the second % is the standardized Intego data for the total Flemish population.

\*\* Standardization was possible for the total population, but not for specific age cohorts.

\*\*\* Data are available for 20-year period. In this table 10-year interval periods are described.

## The RECORD statement

Checklist of items, extended from the STROBE statement that should be reported in observational studies using routinely collected health data.

|                           | Item No. | STROBE items                                                                                                                                                                               | Location in manuscript where items are reported | RECORD items                                                                                                                                                                                                                                                                                                                                                                                                                                       | Location in manuscript where items are reported                                                  |
|---------------------------|----------|--------------------------------------------------------------------------------------------------------------------------------------------------------------------------------------------|-------------------------------------------------|----------------------------------------------------------------------------------------------------------------------------------------------------------------------------------------------------------------------------------------------------------------------------------------------------------------------------------------------------------------------------------------------------------------------------------------------------|--------------------------------------------------------------------------------------------------|
| <b>Title and abstract</b> |          |                                                                                                                                                                                            |                                                 |                                                                                                                                                                                                                                                                                                                                                                                                                                                    |                                                                                                  |
|                           | 1        | (a) Indicate the study's design with a commonly used term in the title or the abstract (b) Provide in the abstract an informative and balanced summary of what was done and what was found |                                                 | <p>RECORD 1.1: The type of data used should be specified in the title or abstract. When possible, the name of the databases used should be included.</p> <p>RECORD 1.2: If applicable, the geographic region and timeframe within which the study took place should be reported in the title or abstract.</p> <p>RECORD 1.3: If linkage between databases was conducted for the study, this should be clearly stated in the title or abstract.</p> | <p>1.1: Title (Title page and abstract)</p> <p>1.2 Geographic region: abstract</p> <p>1.3 NA</p> |
| <b>Introduction</b>       |          |                                                                                                                                                                                            |                                                 |                                                                                                                                                                                                                                                                                                                                                                                                                                                    |                                                                                                  |
| Background rationale      | 2        | Explain the scientific background and rationale for the investigation being reported                                                                                                       |                                                 |                                                                                                                                                                                                                                                                                                                                                                                                                                                    | Introduction, p.2, paragraph 1-4                                                                 |
| Objectives                | 3        | State specific objectives, including any prespecified hypotheses                                                                                                                           |                                                 |                                                                                                                                                                                                                                                                                                                                                                                                                                                    | Introduction, p.2, paragraph 4                                                                   |
| <b>Methods</b>            |          |                                                                                                                                                                                            |                                                 |                                                                                                                                                                                                                                                                                                                                                                                                                                                    |                                                                                                  |
| Study Design              | 4        | Present key elements of study design early in the paper                                                                                                                                    |                                                 |                                                                                                                                                                                                                                                                                                                                                                                                                                                    | Methods, p. 3, design                                                                            |

|                                                                                                                                                                 |                              |   |                                                                                                                                                                                                                                                                                                                                                                                                                                                                                                                                                                                                                                                                                                                              |                                                                                                                                                                                                                                                                                                                                                                                                                                                                                                                                                                                                                                                                                                      |                                                                                                                                                                                     |
|-----------------------------------------------------------------------------------------------------------------------------------------------------------------|------------------------------|---|------------------------------------------------------------------------------------------------------------------------------------------------------------------------------------------------------------------------------------------------------------------------------------------------------------------------------------------------------------------------------------------------------------------------------------------------------------------------------------------------------------------------------------------------------------------------------------------------------------------------------------------------------------------------------------------------------------------------------|------------------------------------------------------------------------------------------------------------------------------------------------------------------------------------------------------------------------------------------------------------------------------------------------------------------------------------------------------------------------------------------------------------------------------------------------------------------------------------------------------------------------------------------------------------------------------------------------------------------------------------------------------------------------------------------------------|-------------------------------------------------------------------------------------------------------------------------------------------------------------------------------------|
| 1<br>2<br>3<br>4                                                                                                                                                | Setting                      | 5 | Describe the setting, locations, and relevant dates, including periods of recruitment, exposure, follow-up, and data collection                                                                                                                                                                                                                                                                                                                                                                                                                                                                                                                                                                                              |                                                                                                                                                                                                                                                                                                                                                                                                                                                                                                                                                                                                                                                                                                      | Methods, pp. 3-4, design and data collection                                                                                                                                        |
| 5<br>6<br>7<br>8<br>9<br>10<br>11<br>12<br>13<br>14<br>15<br>16<br>17<br>18<br>19<br>20<br>21<br>22<br>23<br>24<br>25<br>26<br>27<br>28<br>29<br>30<br>31<br>32 | Participants                 | 6 | <p>(a) <i>Cohort study</i> - Give the eligibility criteria, and the sources and methods of selection of participants. Describe methods of follow-up</p> <p><i>Case-control study</i> - Give the eligibility criteria, and the sources and methods of case ascertainment and control selection. Give the rationale for the choice of cases and controls</p> <p><i>Cross-sectional study</i> - Give the eligibility criteria, and the sources and methods of selection of participants</p> <p>(b) <i>Cohort study</i> - For matched studies, give matching criteria and number of exposed and unexposed</p> <p><i>Case-control study</i> - For matched studies, give matching criteria and the number of controls per case</p> | <p>RECORD 6.1: The methods of study population selection (such as codes or algorithms used to identify subjects) should be listed in detail. If this is not possible, an explanation should be provided.</p> <p>RECORD 6.2: Any validation studies of the codes or algorithms used to select the population should be referenced. If validation was conducted for this study and not published elsewhere, detailed methods and results should be provided.</p> <p>RECORD 6.3: If the study involved linkage of databases, consider use of a flow diagram or other graphical display to demonstrate the data linkage process, including the number of individuals with linked data at each stage.</p> | <p>6.1 Methods, p. 3, appendix A for ICPC codes and appendix B for ACT codes</p> <p>6.2 Intego registry external validation described in Truyers et al. Reference</p> <p>6.3 NA</p> |
| 33<br>34<br>35<br>36<br>37<br>38                                                                                                                                | Variables                    | 7 | Clearly define all outcomes, exposures, predictors, potential confounders, and effect modifiers. Give diagnostic criteria, if applicable.                                                                                                                                                                                                                                                                                                                                                                                                                                                                                                                                                                                    | RECORD 7.1: A complete list of codes and algorithms used to classify exposures, outcomes, confounders, and effect modifiers should be provided. If these cannot be reported, an explanation should be provided.                                                                                                                                                                                                                                                                                                                                                                                                                                                                                      | 7.1 Methods, p. 3, design, appendix A and appendix B                                                                                                                                |
| 39<br>40<br>41<br>42<br>43<br>44                                                                                                                                | Data sources/<br>measurement | 8 | For each variable of interest, give sources of data and details of methods of assessment (measurement).                                                                                                                                                                                                                                                                                                                                                                                                                                                                                                                                                                                                                      |                                                                                                                                                                                                                                                                                                                                                                                                                                                                                                                                                                                                                                                                                                      | Page 5: Methods, design pp. 3-4, the Intego                                                                                                                                         |

|                                  |    |                                                                                                                                                                                                                                                                                                                                                                                                                                                                                                                                                                      |  |                                                              |                                                                        |
|----------------------------------|----|----------------------------------------------------------------------------------------------------------------------------------------------------------------------------------------------------------------------------------------------------------------------------------------------------------------------------------------------------------------------------------------------------------------------------------------------------------------------------------------------------------------------------------------------------------------------|--|--------------------------------------------------------------|------------------------------------------------------------------------|
|                                  |    | Describe comparability of assessment methods if there is more than one group                                                                                                                                                                                                                                                                                                                                                                                                                                                                                         |  |                                                              | Database is explained in detail                                        |
| Bias                             | 9  | Describe any efforts to address potential sources of bias                                                                                                                                                                                                                                                                                                                                                                                                                                                                                                            |  |                                                              | Methods, design, p.3 and Discussion, pp. 11-12, paragraph 5            |
| Study size                       | 10 | Explain how the study size was arrived at                                                                                                                                                                                                                                                                                                                                                                                                                                                                                                                            |  |                                                              | NA                                                                     |
| Quantitative variables           | 11 | Explain how quantitative variables were handled in the analyses. If applicable, describe which groupings were chosen, and why                                                                                                                                                                                                                                                                                                                                                                                                                                        |  |                                                              | Methods, data analysis p.5                                             |
| Statistical methods              | 12 | (a) Describe all statistical methods, including those used to control for confounding<br>(b) Describe any methods used to examine subgroups and interactions<br>(c) Explain how missing data were addressed<br>(d) <i>Cohort study</i> - If applicable, explain how loss to follow-up was addressed<br><i>Case-control study</i> - If applicable, explain how matching of cases and controls was addressed<br><i>Cross-sectional study</i> - If applicable, describe analytical methods taking account of sampling strategy<br>(e) Describe any sensitivity analyses |  |                                                              | (a) methods, data analysis p.5<br>(b) NA<br>(c) NA<br>(d) NA<br>(e) NA |
| Data access and cleaning methods |    | ..                                                                                                                                                                                                                                                                                                                                                                                                                                                                                                                                                                   |  | RECORD 12.1: Authors should describe the extent to which the | 12.1 Data sharing statement, p.14                                      |

|                  |    |                                                                                                                                                                                                                                                                                                                                                 |  |                                                                                                                                                                                                                                                                                                                    |                                                                            |
|------------------|----|-------------------------------------------------------------------------------------------------------------------------------------------------------------------------------------------------------------------------------------------------------------------------------------------------------------------------------------------------|--|--------------------------------------------------------------------------------------------------------------------------------------------------------------------------------------------------------------------------------------------------------------------------------------------------------------------|----------------------------------------------------------------------------|
|                  |    |                                                                                                                                                                                                                                                                                                                                                 |  | investigators had access to the database population used to create the study population.<br><br>RECORD 12.2: Authors should provide information on the data cleaning methods used in the study.                                                                                                                    | 12.2 Availability of data and materials, p.14                              |
| Linkage          |    | ..                                                                                                                                                                                                                                                                                                                                              |  | RECORD 12.3: State whether the study included person-level, institutional-level, or other data linkage across two or more databases. The methods of linkage and methods of linkage quality evaluation should be provided.                                                                                          | NA                                                                         |
| <b>Results</b>   |    |                                                                                                                                                                                                                                                                                                                                                 |  |                                                                                                                                                                                                                                                                                                                    |                                                                            |
| Participants     | 13 | (a) Report the numbers of individuals at each stage of the study ( <i>e.g.</i> , numbers potentially eligible, examined for eligibility, confirmed eligible, included in the study, completing follow-up, and analysed)<br>(b) Give reasons for non-participation at each stage.<br>(c) Consider use of a flow diagram                          |  | RECORD 13.1: Describe in detail the selection of the persons included in the study ( <i>i.e.</i> , study population selection) including filtering based on data quality, data availability and linkage. The selection of included persons can be described in the text and/or by means of the study flow diagram. | NA                                                                         |
| Descriptive data | 14 | (a) Give characteristics of study participants ( <i>e.g.</i> , demographic, clinical, social) and information on exposures and potential confounders<br>(b) Indicate the number of participants with missing data for each variable of interest<br>(c) <i>Cohort study</i> - summarise follow-up time ( <i>e.g.</i> , average and total amount) |  |                                                                                                                                                                                                                                                                                                                    | (a) Results, pp. 6-9<br>Table 1<br>Figures 1-3<br><br>(b) NA<br><br>(c) NA |

|                                                                                              |                   |    |                                                                                                                                                                                                                                                                                                                                                                                                                                |  |                                                                                                                                                                                                                   |                                                  |
|----------------------------------------------------------------------------------------------|-------------------|----|--------------------------------------------------------------------------------------------------------------------------------------------------------------------------------------------------------------------------------------------------------------------------------------------------------------------------------------------------------------------------------------------------------------------------------|--|-------------------------------------------------------------------------------------------------------------------------------------------------------------------------------------------------------------------|--------------------------------------------------|
| 1<br>2<br>3<br>4<br>5<br>6<br>7<br>8<br>9<br>10<br>11                                        | Outcome data      | 15 | <p><i>Cohort study</i> - Report numbers of outcome events or summary measures over time</p> <p><i>Case-control study</i> - Report numbers in each exposure category, or summary measures of exposure</p> <p><i>Cross-sectional study</i> - Report numbers of outcome events or summary measures</p>                                                                                                                            |  |                                                                                                                                                                                                                   | NA                                               |
| 12<br>13<br>14<br>15<br>16<br>17<br>18<br>19<br>20<br>21<br>22<br>23<br>24<br>25<br>26<br>27 | Main results      | 16 | <p>(a) Give unadjusted estimates and, if applicable, confounder-adjusted estimates and their precision (e.g., 95% confidence interval). Make clear which confounders were adjusted for and why they were included</p> <p>(b) Report category boundaries when continuous variables were categorized</p> <p>(c) If relevant, consider translating estimates of relative risk into absolute risk for a meaningful time period</p> |  |                                                                                                                                                                                                                   | (a) Results, pp. 6-9<br>Table 1-3<br>Figures 1-3 |
| 28<br>29<br>30<br>31<br>32                                                                   | Other analyses    | 17 | Report other analyses done—e.g., analyses of subgroups and interactions, and sensitivity analyses                                                                                                                                                                                                                                                                                                                              |  |                                                                                                                                                                                                                   | NA                                               |
| 33                                                                                           | <b>Discussion</b> |    |                                                                                                                                                                                                                                                                                                                                                                                                                                |  |                                                                                                                                                                                                                   |                                                  |
| 34<br>35<br>36                                                                               | Key results       | 18 | Summarise key results with reference to study objectives                                                                                                                                                                                                                                                                                                                                                                       |  |                                                                                                                                                                                                                   | Discussion, last paragraph with conclusions p.12 |
| 37<br>38<br>39<br>40<br>41<br>42<br>43<br>44                                                 | Limitations       | 19 | Discuss limitations of the study, taking into account sources of potential bias or imprecision. Discuss both direction and magnitude of any potential bias                                                                                                                                                                                                                                                                     |  | RECORD 19.1: Discuss the implications of using data that were not created or collected to answer the specific research question(s). Include discussion of misclassification bias, unmeasured confounding, missing | Discussion, paragraph 5, pp. 11-12               |

1  
2  
3  
4  
5  
6  
7  
8  
9  
10  
11  
12  
13  
14  
15  
16  
17  
18  
19  
20  
21  
22  
23  
24  
25  
26  
27  
28  
29  
30  
31  
32  
33  
34  
35  
36  
37  
38  
39  
40  
41  
42  
43  
44  
45  
46  
47



|                                                           |    |                                                                                                                                                                            |  |                                                                                                                                                          |                                          |
|-----------------------------------------------------------|----|----------------------------------------------------------------------------------------------------------------------------------------------------------------------------|--|----------------------------------------------------------------------------------------------------------------------------------------------------------|------------------------------------------|
|                                                           |    |                                                                                                                                                                            |  | data, and changing eligibility over time, as they pertain to the study being reported.                                                                   |                                          |
| Interpretation                                            | 20 | Give a cautious overall interpretation of results considering objectives, limitations, multiplicity of analyses, results from similar studies, and other relevant evidence |  |                                                                                                                                                          | Discussion, pp. 10-12                    |
| Generalisability                                          | 21 | Discuss the generalisability (external validity) of the study results                                                                                                      |  |                                                                                                                                                          | Discussion, pp. 10-12                    |
| <b>Other Information</b>                                  |    |                                                                                                                                                                            |  |                                                                                                                                                          |                                          |
| Funding                                                   | 22 | Give the source of funding and the role of the funders for the present study and, if applicable, for the original study on which the present article is based              |  |                                                                                                                                                          | Funding, p.14                            |
| Accessibility of protocol, raw data, and programming code |    | ..                                                                                                                                                                         |  | RECORD 22.1: Authors should provide information on how to access any supplemental information such as the study protocol, raw data, or programming code. | Availability of data and materials, p.14 |

\*Reference: Benchimol EI, Smeeth L, Guttman A, Harron K, Moher D, Petersen I, Sørensen HT, von Elm E, Langan SM, the RECORD Working Committee. The REporting of studies Conducted using Observational Routinely-collected health Data (RECORD) Statement. *PLoS Medicine* 2015; in press.

# BMJ Open

## The epidemiology of knee osteoarthritis in general practice: a registry-based study

|                                 |                                                                                                                                                                                                                                                                                                                                                                                                                                                                                                                                                                                                                                                                                                                                                                                                                                                                                                                                           |
|---------------------------------|-------------------------------------------------------------------------------------------------------------------------------------------------------------------------------------------------------------------------------------------------------------------------------------------------------------------------------------------------------------------------------------------------------------------------------------------------------------------------------------------------------------------------------------------------------------------------------------------------------------------------------------------------------------------------------------------------------------------------------------------------------------------------------------------------------------------------------------------------------------------------------------------------------------------------------------------|
| Journal:                        | <i>BMJ Open</i>                                                                                                                                                                                                                                                                                                                                                                                                                                                                                                                                                                                                                                                                                                                                                                                                                                                                                                                           |
| Manuscript ID                   | bmjopen-2019-031734.R1                                                                                                                                                                                                                                                                                                                                                                                                                                                                                                                                                                                                                                                                                                                                                                                                                                                                                                                    |
| Article Type:                   | Original research                                                                                                                                                                                                                                                                                                                                                                                                                                                                                                                                                                                                                                                                                                                                                                                                                                                                                                                         |
| Date Submitted by the Author:   | 21-Sep-2019                                                                                                                                                                                                                                                                                                                                                                                                                                                                                                                                                                                                                                                                                                                                                                                                                                                                                                                               |
| Complete List of Authors:       | Spitaels, David; Katholieke Universiteit Leuven, Departement of Public Health and Primary Care<br>Mamouris, Pavlos; Katholieke Universiteit Leuven Groep Biomedische Wetenschappen, Departement of Public Health and Primary Care<br>Vaes, Bert; Katholieke Universiteit Leuven Groep Biomedische Wetenschappen, Departement of Public Health and Primary Care;<br>Universite catholique de Louvain, Louvain Drug Research Institute<br>Smeets, Miek; Katholieke Universiteit Leuven Groep Biomedische Wetenschappen, Departement of Public Health and Primary Care<br>Luyten, F; Katholieke Universiteit Leuven UZ Leuven, Rheumatology<br>Hermens, Rosella; Radboudumc IQ healthcare; Katholieke Universiteit Leuven Groep Biomedische Wetenschappen, Departement of Public Health and Primary Care<br>Vankrunkelsven, Patrik; Katholieke Universiteit Leuven Groep Humane Wetenschappen, Departement of Public Health and Primary Care |
| <b>Primary Subject Heading</b>: | Epidemiology                                                                                                                                                                                                                                                                                                                                                                                                                                                                                                                                                                                                                                                                                                                                                                                                                                                                                                                              |
| Secondary Subject Heading:      | General practice / Family practice, Rheumatology                                                                                                                                                                                                                                                                                                                                                                                                                                                                                                                                                                                                                                                                                                                                                                                                                                                                                          |
| Keywords:                       | Knee < ORTHOPAEDIC & TRAUMA SURGERY, Musculoskeletal disorders < ORTHOPAEDIC & TRAUMA SURGERY, PRIMARY CARE, PUBLIC HEALTH                                                                                                                                                                                                                                                                                                                                                                                                                                                                                                                                                                                                                                                                                                                                                                                                                |
|                                 |                                                                                                                                                                                                                                                                                                                                                                                                                                                                                                                                                                                                                                                                                                                                                                                                                                                                                                                                           |

SCHOLARONE™  
Manuscripts

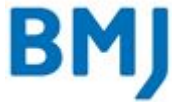

I, the Submitting Author has the right to grant and does grant on behalf of all authors of the Work (as defined in the below author licence), an exclusive licence and/or a non-exclusive licence for contributions from authors who are: i) UK Crown employees; ii) where BMJ has agreed a CC-BY licence shall apply, and/or iii) in accordance with the terms applicable for US Federal Government officers or employees acting as part of their official duties; on a worldwide, perpetual, irrevocable, royalty-free basis to BMJ Publishing Group Ltd ("BMJ") its licensees and where the relevant Journal is co-owned by BMJ to the co-owners of the Journal, to publish the Work in this journal and any other BMJ products and to exploit all rights, as set out in our [licence](#).

The Submitting Author accepts and understands that any supply made under these terms is made by BMJ to the Submitting Author unless you are acting as an employee on behalf of your employer or a postgraduate student of an affiliated institution which is paying any applicable article publishing charge ("APC") for Open Access articles. Where the Submitting Author wishes to make the Work available on an Open Access basis (and intends to pay the relevant APC), the terms of reuse of such Open Access shall be governed by a Creative Commons licence – details of these licences and which [Creative Commons](#) licence will apply to this Work are set out in our licence referred to above.

Other than as permitted in any relevant BMJ Author's Self Archiving Policies, I confirm this Work has not been accepted for publication elsewhere, is not being considered for publication elsewhere and does not duplicate material already published. I confirm all authors consent to publication of this Work and authorise the granting of this licence.

# The epidemiology of knee osteoarthritis in general practice: a registry-based study

## Authors

David Spitaels<sup>1</sup>; Pavlos Mamouris<sup>1</sup>; Bert Vaes<sup>1,2</sup>; Miek Smeets<sup>1</sup>; Frank Luyten<sup>3</sup>; Rosella Hermens<sup>1,2</sup>;  
Patrik Vankrunkelsven<sup>1</sup>

## Affiliations

<sup>1</sup> Academic Center for General Practice, KU Leuven, Leuven, Belgium

<sup>2</sup> Louvain Drug Research Institute, Clinical Pharmacy Research Group and Institute of Health and Society (IRSS), Université catholique de Louvain (UCL), Brussels, Belgium

<sup>3</sup> Division of Rheumatology, University Hospitals Leuven, Leuven, Belgium

<sup>4</sup> Radboud Institute for Health Sciences (RIHS), IQ Healthcare, Radboud University Medical Center

## Correspondence

D. Spitaels, MD, ORCID ID 0000-0002-7900-7533

Academic Center for General Practice, KU Leuven

Kapucijnenvoer 33, J building, 3000 Leuven, Belgium

E-mail: [david.spitaels@kuleuven.be](mailto:david.spitaels@kuleuven.be)

## Word count

3178/4000

# The epidemiology of knee osteoarthritis in general practice: a registry-based study

## Abstract

**Objectives** The present study investigated (i) trends in the prevalence and incidence of knee osteoarthritis over a 20-year period; (ii) trends in multimorbidity; and (iii) trends in drug prescriptions.

**Design** Registry-based study.

**Setting** Primary health care, Flanders, Belgium.

**Participants** Data were collected from Intego, a general practice-based morbidity registration network. In the study period between 1996 and 2015 data from 440,140 unique patients were available.

**Outcome measures** Trends in prevalence and incidence rate of knee osteoarthritis were computed using joinpoint regression analysis. The mean disease count was calculated to assess trends in multimorbidity. In addition, the number of drug prescriptions was identified by the Anatomical Therapeutic Chemical Classification code and trends were equally recorded with joinpoint regression.

**Results** The prevalence of knee osteoarthritis increased from 1.99% in 1996 to 3.56% in 2015. An upward trend was observed with an average annual percentage change (AAPC) of 2.5 (95%CI 2.2-2.9). The incidence remained stable with 3.75‰ in 2015 (AAPC=-0.5, 95%CI -1.4-0.5). The mean disease count significantly increased from 1.63 to 2.34 ( $p<0.001$ ) for incident cases with knee osteoarthritis. Finally, we observed a significantly positive trend in the overall prescription of acetaminophen (AAPC= 6.7, 95%CI 5.6-7.7), weak opioids (AAPC= 4.0, 95%CI 0.9-7.3) and glucosamine (AAPC= 8.6, 95%CI 2.4-15.1).

**Conclusions** Increased prevalence, multimorbidity, and number of drug prescriptions confirm an increased burden of knee osteoarthritis. In future, these trends can be used to prioritize initiatives for improvement in care.

## Key Words

Knee osteoarthritis; multimorbidity; general practice; trends; burden of illness

## Article Summary

### Strengths and limitations of this study

- The Intego open registry provides real-world data of 440,140 unique patients in a primary care setting, representative for the Flemish population.
- This registry database, with data over a 20-year time period (1996-2015), lends itself perfectly for trend analyses.
- Estimates on the prevalence and incidence of knee osteoarthritis are scarce for primary care settings. This study defines knee osteoarthritis when it becomes a healthcare problem for the patient.
- Data completeness depends on the quality of registration of the participating general practitioners. To this end, only optimal registration practices are included in the Intego database.
- The lack of data verification and misclassification is minimalised because new diagnoses are automatically linked to ICPC-2 and ICD-10 codes.

## Introduction

Osteoarthritis (OA) is the most common joint disease and is expected to become the fourth leading cause of disability worldwide by 2020.<sup>1</sup> OA mainly affects the joints of the knees, hips, hands, facets and feet, but knee OA accounts for 83% of the total OA burden.<sup>2</sup> The prevalence of knee OA varies according to the definition: from subjective (population-based) assessments to clinical and radiographic definitions, often with low levels of concordance between them.<sup>3</sup> However, estimates on the prevalence of knee OA are scarce for primary care settings.<sup>4</sup>

At present, the purposes of conservative knee OA treatment are to alleviate pain, to improve the function of the joint and to slow down joint damage by pharmacological and non-pharmacological means.<sup>5</sup> All patients should be offered the following core conservative interventions: information to enhance their understanding about OA, advice to exercise, and to achieve weight loss for people who are obese or overweight.<sup>6 7</sup> Pharmacological management is dominated both by acetaminophen and by nonsteroidal anti-inflammatory drugs (NSAIDs).<sup>5 8 9</sup> The presence of multimorbidity may also affect choices in the pharmacological management, since multimorbidity and polypharmacy are closely related.<sup>6 10 11</sup> Almost all patients with OA suffer from at least one comorbid disease.<sup>12</sup> Common comorbidities in patients with knee OA are cardiovascular diseases, diabetes mellitus, chronic obstructive pulmonary disease, and obesity.<sup>13</sup> Nevertheless, multimorbidity-adapted management protocols are being developed and provide tailored guidance for pharmacological management and exercise therapy.<sup>5 7</sup> Numerous reports indicate that the number of people suffering from chronic diseases, multimorbidity and polypharmacy continues to increase, but those studies are mainly based on cross-sectional studies in different populations.<sup>14</sup> Time trends in the prevalence of multimorbidity and polypharmacy are scarce.<sup>15 16</sup> The

1  
2  
3 Flemish primary care-based Intego database offers an excellent opportunity to extract “real world” data  
4 and evaluate time trends.<sup>17</sup>  
5  
6

7 The aims of the present study were 1) to evaluate time trends in the prevalence and incidence of patients  
8 with knee OA managed in general practice; 2) to assess trends in the disease burden and 3) to assess  
9 trends in GPs’ drug prescriptions over a 20-year period.  
10  
11

## 12 Methods

### 13 Data source

14  
15 This trend analysis study was performed using Intego, a general practice-based morbidity registration  
16 network in Flanders, Belgium.<sup>17</sup> The Intego database comprises extracted information from electronic  
17 health records (EHR) of general practitioners (GPs), all using the medical software programme Medidoc  
18 (Corilus NV, Aalter, Belgium).<sup>18</sup> Systematic collection of data started in 1994. In 2015, 111 GPs of 48  
19 practices evenly spread throughout Flanders, collaborated in the Intego project. GPs applied for  
20 inclusion in the registry. Before acceptance of their data, registration performance was audited using a  
21 number of algorithms that compared their results with those of all other applicants. Only the data of the  
22 practices with an optimal registration performance were included in the database. The selection  
23 procedure was described in detail previously.<sup>17</sup> The Intego GPs prospectively and routinely registered  
24 all new diagnoses together with new drug prescriptions, as well as laboratory test results, some  
25 background information (including gender and year of birth) and some biomedical parameters (i.e. blood  
26 pressure, height, weight, smoking status and mortality), using computer-generated keywords internally  
27 linked to codes. With specially framed extraction software, new data were encrypted and collected from  
28 the GPs’ personal computers and entered into a central database. Registered data were continuously  
29 updated and historically accumulated for each patient. New diagnoses were classified according to a  
30 very detailed thesaurus and automatically linked to the International Classification of Primary Care  
31 (ICPC-2) and International Statistical Classification of Diseases and Related Health Problems 10th  
32 Revision (ICD-10).<sup>19</sup> Drugs were classified according to the WHO’s Anatomical Therapeutic Chemical  
33 (ATC) classification system.<sup>20</sup>  
34  
35  
36  
37  
38  
39  
40  
41  
42  
43  
44  
45  
46  
47

### 48 Study population

49 For the present study, data over a 20-year time interval from 1 January 1996 to 31 December 2015 were  
50 used. In this period, 440,140 unique patients were registered in the Intego database. The yearly contact  
51 group (=YCG) is defined as the number of different patients who consulted their GP in a given year.<sup>21</sup>  
52 During the study period, the YCG varied between 81,763 and 151,971 people (see supplementary file 1  
53 for the exact number per year). Throughout the study period, 79 GP practices provided their data, with  
54 72% contributing for 15 or more years (see supplementary file 2). This study was reported in accordance  
55 with the RECORD checklist specific to observational studies using routinely collected health data.<sup>22</sup>  
56  
57  
58  
59  
60

## Measures

### Data on prevalence and incidence

Patients with knee OA were identified based on an ICPC-2 coded diagnosis in their EHR. The prevalence of a population is the proportion of the population with the disease at a specified time. Unlike incidence rates, which focus on new events, prevalence focuses on existing states. Because of the design of Intego (no episode registration and no recording of cure), prevalence rates could only be calculated on incurable chronic diseases, such as knee OA.<sup>17</sup> The incidence in Intego is calculated as the number of new cases of disease divided by the person-time magnitude. Calculating disease prevalence and incidence requires both a numerator (number of events or persons with a disease) and a matching denominator (the ‘population at risk’ being studied). Determining primary care practice denominators is challenging.<sup>23</sup> In this study, the YCG was used as denominator for all time trend analyses.<sup>21</sup>

### Data on multimorbidity

Patients’ medical history before they presented with knee OA was registered for all cases between 1996 and 2015. There are several instruments available to calculate multimorbidity, for example, the Carlson Index, the Cumulative Illness Rating Scale, the Index of Coexistent Diseases and the Kaplan Index.<sup>24-27</sup> For this study, the disease burden was calculated for all incident cases with knee OA. For this disease count, a list of chronic diseases based on the paper by Knottnerus et al was used.<sup>28</sup> For the presence of chronic kidney disease (CKD), the glomerular filtration rate (GFR) was based on the closest creatinine measurement in the two years before or after presentation with knee OA diagnosis (Supplementary file 3: ICPC codes for diagnosis and multimorbidity).

### Data on drug prescriptions

The prescription of medication for knee OA, including acetaminophen, oral and topical anti-inflammatory drugs, cox-2 selective anti-inflammatory drugs, weak and strong opioids, parenteral glucocorticoids, parenteral hyaluronic acid and glucosamine was extracted from Intego for all prevalent cases with knee OA (Supplementary file 4: used ACT codes). Prescription of medication was considered positive if it was prescribed at least once a year.

### Statistical analysis

Descriptive statistics, with frequency distribution and percentages, were used to measure the prevalence (/100 patients) and incidence (/1000 patient years at risk) of patients with knee OA. Data were stratified by gender and ten-year age cohorts, starting from 25 with 85 years and older as the last cohort. The rates were age-standardized by taking the Flemish population of the year 1996 as reference population.<sup>29</sup> Additionally, possible time trends were analysed in the age-standardized cohorts with joinpoint regression analysis.<sup>30</sup> Joinpoint analysis identifies the best-fitting point, where a statistically significant change (called the “joinpoint”) occurs, and determines the trends between joinpoints. Joinpoint regression allows us to identify the time point(s) of follow-up at which trends significantly change.<sup>31</sup> A



1  
2  
3 minimum number of three observations from a joinpoint to either end of the data, and a minimum  
4 number of four observations between two joinpoints were required.<sup>32</sup> The annual percentage change  
5 (APC) is proposed to summarize and compare the rates of changes between successive change points.<sup>33</sup>  
6 In the final model, the joinpoint analysis also provides an average annual percentage change (AAPC) as  
7 an average of APC estimates.<sup>33</sup> This means that trends over a specific period were described by the  
8 annual percent change (APC), while trends over the whole 1996–2015 period were summarised using  
9 the average annual percent change (AAPC). Analysis was performed with the Joinpoint Regression  
10 Program (version 3.5.3, released in May 2013 and available at <http://surveillance.cancer.gov/joinpoint>).  
11 This program starts with the minimum number of joinpoint (e.g. zero joinpoints, which is a straight line)  
12 and tests whether more joinpoints are statistically significant and must be added to the model. This  
13 enables the user to test that an apparent change in trend is statistically significant.

14  
15  
16 Trends in the multimorbidity profile for incident cases with knee OA were explored over four time  
17 intervals of five years (1996-2000, 2001-2005, 2006-2010 and 2011-2015) by the Cochran-Armitage  
18 test and the Jonckheere-Terpstra test. The Cochran-Armitage test for trend analysis is a modified  
19 Pearson's chi-square test to assess the association between binary and ordinal categories (e.g. between  
20 comorbidities and time intervals). The Jonckheere-Terpstra trend test was used to analyse trends for  
21 continuous variables (e.g. between age and time intervals).<sup>34</sup>

22  
23  
24 Over the same 20-year time period, trends in drug prescriptions for prevalent cases with knee OA were  
25 analyzed using joinpoint regression analysis, as described above. Two-sided p-values less than 0.05  
26 were considered to indicate statistical significance. Analyses were performed using R Software Version  
27 3.3.2 (Free Software Foundation Inc., Boston, MA, USA).

### 28 Patient involvement

29 No patients were involved in defining the research question or the outcome measures, nor were they  
30 involved in the design and implementation of the study. There are no plans to involve patients in the  
31 dissemination of the results.

## 32 Results

### 33 Demographic characteristics and trends in the prevalence and incidence of patients with 34 knee osteoarthritis (1996-2015)

35  
36  
37  
38  
39  
40  
41  
42  
43  
44  
45  
46  
47  
48  
49  
50  
51  
52  
53  
54  
55  
56  
57  
58  
59  
60  
Between 1 January 1996 and 31 December 2015, the Intego database included data on 440,140 unique  
patients. Table 1 shows the demographic characteristics of the patients with knee OA by gender and age  
cohorts in Table 1. The age-standardized prevalence of knee OA increased by 79% from 1.99% in 1996  
to 3.56% in 2015 (AAPC= 2.5, 95%CI 2.2-2.9, Figure 1 and supplementary file 5). Women have a  
higher prevalence than men do, but over the 20 years of the study men have a higher relative increase  
in prevalence (AAPC= 3.1, 95%CI 2.7-3.5 for men versus AAPC= 2.4, 95%CI 2.0-2.7 for women).

Figure 2 presents the observed and modeled long-term time trends in prevalence by gender. The age-standardized incidence of patients with knee OA remained stable with 4.23‰ in 1996 and 3.75‰ in 2015 (AAPC=-0.5, 95%CI -1.4-0.5), but showed a positive trend between 2006 and 2015 from 3.05‰ to 3.75‰, respectively (APC= 1.9, 95%CI 0.4-3.5) (Figure 3). Between 2006 and 2015, this positive trend was higher for men (APC= 2.5, 95%CI 0.5-4.5) than for women (APC= 1.9, 95%CI 0.4-3.5) (Figure 3).

### Trends in multimorbidity in newly diagnosed patients with knee osteoarthritis (1996-2015)

In the 20-year study period, the mean age at diagnosis of knee OA remained stable ( $p=0.384$ ) with 55.3 years in 1996 and 56.9 years in 2015, respectively, while a non-significant decline was found in the proportion of women in this period (65% to 62%,  $p=0.052$ ). Additionally, the disease burden was defined by calculating the mean disease count of patients with knee OA.<sup>28</sup> This mean disease count showed a significant increase in the study period ranging from 1.6 to 2.3 ( $p<0.001$ ), meaning that the comorbid burden of patients with knee OA increased. In this study, the following comorbidities increased significantly: the proportions of patients with diabetes (6% to 15%,  $p<0.001$ ), cardiovascular events (21% to 27%,  $p<0.001$ ), depression (9% to 13%,  $p=0.009$ ) and obesity (5% to 8%,  $p<0.001$ ). Hypertension, gastro-intestinal ulcer and renal failure remained stable. Additionally, we noted that the proportion of knee OA patients with cancer (2% to 3%,  $p<0.001$ ), asthma (8% to 17%,  $p<0.001$ ) and substance abuse (0% to 2%,  $p<0.001$ ) increased significantly during the study period, while the proportion with osteoporosis remained stable (Table 2).

### Trends in prescriptions for patients with knee osteoarthritis (1996-2015)

The prescription of acetaminophen (AAPC= 6.7, 95%CI 5.6-7.7), weak opioids (AAPC= 4.0, 95%CI 0.9-7.3) and glucosamine (AAPC= 8.6, 95%CI 2.4-15.1) for patients with knee OA increased during the study period (Table 3). The prevalence of patients with knee OA who were prescribed acetaminophen was lower than those with oral NSAIDs (19.2% versus 29.4% in 2015; 5.3% versus 28.4% in 1996). The prescription of oral, topical and cox-2 selective NSAIDs remained stable for both genders during the study period. The use of strong opioids showed a strong increase between 1996 and 2003 (AAPC= 9.0, 95%CI 2.5-16), but then decreased slightly in the period from 2003 to 2015 (AAPC= -2.0, 95%CI 3.7 to -0.3).

## Discussion

This study presents estimates of knee OA prevalence and incidence based on a large morbidity registration network for general practice in Belgium. During the 20-year study period, the age-standardized prevalence of knee OA significantly increased while the age-standardized incidence rate remained stable. During the study period, patients with knee OA experienced higher multimorbidity, as

1  
2  
3 shown by almost a doubling of the disease count. Oral NSAIDs were most frequently prescribed for the  
4 prevalent patients with knee OA, while prescription of acetaminophen, weak opioids and glucosamine  
5 showed an overall positive trend.  
6  
7

8 This study shows that the prevalence rate of knee OA significantly increased even after standardization  
9 of the study population. General practice morbidity registration networks in other European countries  
10 show similar rates for knee OA: in the Netherlands, an overall prevalence of 3.4% and incidence of  
11 3.2‰ was registered in 2016.<sup>35</sup> In our study, we found similar rates with 3.56% and 3.75‰ respectively  
12 for the year 2015. In the UK, the estimated proportion of people who sought treatment for knee OA is  
13 high: 18% of the population aged 45 and over consulted their GP for knee OA.<sup>36</sup> In our study, we found  
14 a consultation prevalence of 21% for the same reference year (2010) and age cohorts. The latter study  
15 also found that OA is the most common musculoskeletal condition in older people and that just over  
16 half of all patients consulting their GP about OA have knee OA. In the near future, the number of people  
17 with knee OA is expected to rise considerably because of an aging population and obesity trends.<sup>37</sup>  
18 Nevertheless, the increasing prevalence of knee OA in general practice registration could also be  
19 attributed to other factors, for example: better access to general practice, more awareness of the public  
20 of preventive medicine, better diagnostics, better registration and higher demands and expectations of  
21 older people to remain physically active. Future qualitative research with different stakeholders could  
22 assess these possible explanations.  
23  
24

25 Osteoarthritis is one of the diseases with the highest rate of multimorbidity, with reported rates of 68%  
26 to 85%.<sup>12 38</sup> If patients with comorbid conditions need replacement surgery, they tend to have a higher  
27 risk of revisions and long-term mortality.<sup>39</sup> Coexisting disorders may worsen pain and bring additional  
28 impairments, which necessitate adaptations to the conservative management of knee OA.<sup>13 40</sup> In our  
29 study, knee OA was also strongly associated with the following comorbidities: asthma, cancer,  
30 depression and substance abuse. The substantial contribution of OA to multimorbidity and frailty should  
31 be recognized, further investigated, and needs extra attention in general practice management of long-  
32 term conditions.  
33  
34

35 Pharmacological management of knee OA in general practice is dominated both by acetaminophen and  
36 by NSAIDs, as they are both recommended in evidence-based guidelines.<sup>5 7-9</sup> Although the review by  
37 Machado et al. suggested that acetaminophen has little clinical benefit in OA, guidelines recommend  
38 starting with acetaminophen, because the adverse side effect profile of NSAIDs.<sup>41</sup> In our study, NSAIDs  
39 were the most frequently prescribed pain drug for prevalent patients with knee OA. Verkleij et al.  
40 observed the effects of medication on 104 patients with knee OA in general practice. They demonstrated  
41 no significant difference regarding knee pain and knee function between patients taking diclofenac or  
42 acetaminophen.<sup>42</sup> Furthermore, the discrepancy between drug prescription by the professional and drug  
43 use by the patient can be accumulated by the over the counter availability of acetaminophen and some  
44  
45  
46  
47  
48  
49  
50  
51  
52  
53  
54  
55  
56  
57  
58  
59  
60

1  
2  
3 low oral NSAID in Belgium. Over the counter availability, could be considered as part of self-care to  
4 reduce the burden on health care systems and increase people's choice to take informed treatment  
5 decisions, but the medical outcome resulting from therapeutic options bypassing the physician  
6 prescription stays a major issue.<sup>43</sup> In Intego we look at the GP's prescription and not the actual drug use  
7 by the patient. If acetaminophen should remain the 'first-line' pharmacological treatment for patients  
8 with a new episode, the effects of acetaminophen and the role in patients with multimorbidity should be  
9 further investigated.<sup>44</sup>  
10  
11  
12  
13  
14

## 15 Strengths and limitations

16 The major strengths of this study are the long-term follow-up data of a practice-based morbidity  
17 registration network in general practice. Intego covers more than 2% of the Flemish population, highly  
18 representative for age and gender.<sup>17</sup> A sufficient sample size in primary care registration networks is  
19 advised to be about 1% of the population, which allows the study of common diseases.<sup>45</sup> Longitudinal  
20 data in registry-based studies are used to track the natural history of diseases over time and enable us to  
21 perform time-to-event analyses. General practices have to pass three quality criteria before being  
22 accepted as participants in Intego, what results in a reliable morbidity database.<sup>17</sup> Important attributes  
23 of most patient registries are their large sample size and data variability.<sup>46</sup> A few limitations must also  
24 be considered. Lack of data verification is a common problem in registry-based studies with longitudinal  
25 data of large sample size. In Intego, the lack of data verification and misclassification is minimalised  
26 because new diagnoses are automatically linked to ICPC-2 and ICD-10 codes with a detailed thesaurus,  
27 individual patients are followed over time and their history is taken into account. If diagnoses are not  
28 mutually exclusive, then they count for one. Secondly, we are aware that accurate coding is always a  
29 risk for possible underdiagnosis. The difference between early-onset knee OA and chronic, established  
30 knee OA can not be established with the ICPC codes. Standardized coding for OA should be adopted in  
31 general practice to accurately describe the extent of the condition and to maximize the conservative  
32 management options to improve quality of life. Furthermore, there is no obligation for patients to be  
33 registered with a particular GP in Belgium. Therefore, it can be difficult to define 'the population at risk'  
34 for epidemiological studies in general practice. In Intego, the YCG was used as denominator for all trend  
35 analyses. Importantly, mortality data are lacking in Intego. Therefore, patients in the incidence analysis  
36 are considered at risk until the diagnosis or until December 31 of any specific year to compensate for  
37 possible overestimation in this registry-based study. Finally, obesity and smoking status could not be  
38 reliably assessed from the Intego database, because of insufficient registration in the patient files. To  
39 date, information on socioeconomic status on patient level can not be extracted from Intego. Quality  
40 improvement initiatives should make GPs more aware of the necessity of properly recording up-to-date  
41 patient variables, such as BMI, in the EHR because of their growing importance in patient-tailored  
42 management strategies. Patient portals and remote access to their own medical health record are future  
43  
44  
45  
46  
47  
48  
49  
50  
51  
52  
53  
54  
55  
56  
57  
58  
59  
60

1  
2  
3 initiatives, where the patient could play a more central role to help the GP in keeping these parameters  
4 more up-to-date by shared responsibility.<sup>47</sup>  
5  
6

## 7 8 Conclusion and recommendations

9 In conclusion, increased prevalence, multimorbidity, and number of drug prescriptions, together with  
10 the young age at incidence, confirm the high burden of knee OA. Our registry-based study represents  
11 knee OA diagnoses at a time it becomes a health issue for patients. Professionals face more difficulties  
12 in their conservative management options due to rising multimorbidity. In future, these health trends  
13 can be used to prioritize initiatives for improvement in care.  
14  
15  
16

## 17 18 Acknowledgements

19 The authors would like to thank all the participating general practitioners.  
20  
21

## 22 23 References

- 24 1. Murray CJ, Vos T, Lozano R, et al. Disability-adjusted life years (DALYs) for 291 diseases and injuries  
25 in 21 regions, 1990-2010: a systematic analysis for the Global Burden of Disease Study 2010.  
26 *Lancet* 2012;380(9859):2197-223. doi: 10.1016/S0140-6736(12)61689-4
- 27 2. Vos T, Flaxman AD, Naghavi M, et al. Years lived with disability (YLDs) for 1160 sequelae of 289  
28 diseases and injuries 1990-2010: a systematic analysis for the Global Burden of Disease Study  
29 2010. *Lancet* 2012;380(9859):2163-96. doi: 10.1016/S0140-6736(12)61729-2
- 30 3. Litwic A, Edwards MH, Dennison EM, et al. Epidemiology and burden of osteoarthritis. *Br Med Bull*  
31 2013;105:185-99. doi: 10.1093/bmb/lds038
- 32 4. Bedson J, Jordan K, Croft P. The prevalence and history of knee osteoarthritis in general practice: a  
33 case-control study. *Fam Pract* 2005;22(1):103-8. doi: 10.1093/fampra/cmh700 [published  
34 Online First: 2005/01/11]
- 35 5. McAlindon TE, Bannuru RR, Sullivan MC, et al. OARSI guidelines for the non-surgical management  
36 of knee osteoarthritis. *Osteoarthritis Cartilage* 2014;22(3):363-88. doi:  
37 10.1016/j.joca.2014.01.003 [published Online First: 2014/01/28]
- 38 6. National Institute for Health and Care Excellence (NICE): Osteoarthritis: care and management  
39 (quality standard 87): <http://guidance.nice.org.uk/qs87>. Accessed 20 May 2018.
- 40 7. Fernandes L, Hagen KB, Bijlsma JW, et al. EULAR recommendations for the non-pharmacological  
41 core management of hip and knee osteoarthritis. *Ann Rheum Dis* 2013;72(7):1125-35. doi:  
42 10.1136/annrheumdis-2012-202745 [published Online First: 2013/04/19]
- 43 8. Hochberg MC, Altman RD, April KT, et al. American College of Rheumatology 2012  
44 recommendations for the use of nonpharmacologic and pharmacologic therapies in  
45 osteoarthritis of the hand, hip, and knee. *Arthritis Care Res (Hoboken)* 2012;64(4):465-74.  
46 [published Online First: 2012/05/09]
- 47 9. Kingsbury SR, Gross HJ, Isherwood G, et al. Osteoarthritis in Europe: impact on health status, work  
48 productivity and use of pharmacotherapies in five European countries. *Rheumatology*  
49 (*Oxford*) 2014;53(5):937-47. doi: 10.1093/rheumatology/ket463 [published Online First:  
50 2014/02/04]
- 51 10. Harding PA, Holland AE, Hinman RS, et al. Physical activity perceptions and beliefs following total  
52 hip and knee arthroplasty: a qualitative study. *Physiother Theory Pract* 2015;31(2):107-13.  
53 doi: 10.3109/09593985.2014.959581 [published Online First: 2014/12/17]
- 54 11. de Rooij M, Steultjens MPM, Avezaat E, et al. Restrictions and contraindications for exercise  
55 therapy in patients with hip and knee osteoarthritis and comorbidity. *Physical Therapy*  
56 *Reviews* 2013;18(2):101-11. doi: 10.1179/1743288X12Y.0000000056  
57  
58  
59  
60

12. van Dijk GM, Veenhof C, Schellevis F, et al. Comorbidity, limitations in activities and pain in patients with osteoarthritis of the hip or knee. *BMC Musculoskelet Disord* 2008;9:95. doi: 10.1186/1471-2474-9-95 [published Online First: 2008/06/28]
13. Reeuwijk KG, de Rooij M, van Dijk GM, et al. Osteoarthritis of the hip or knee: which coexisting disorders are disabling? *Clin Rheumatol* 2010;29(7):739-47. doi: 10.1007/s10067-010-1392-8 [published Online First: 2010/02/24]
14. Freid VM, Bernstein AB, Bush MA. Multiple chronic conditions among adults aged 45 and over: trends over the past 10 years. *NCHS Data Brief* 2012(100):1-8. [published Online First: 2012/10/30]
15. van den Akker M, Vaes B, Goderis G, et al. Trends in multimorbidity and polypharmacy in the Flemish-Belgian population between 2000 and 2015. *PLoS One* 2019;14(2):e0212046. doi: 10.1371/journal.pone.0212046 [published Online First: 2019/02/13]
16. Uijen AA, van de Lisdonk EH. Multimorbidity in primary care: prevalence and trend over the last 20 years. *Eur J Gen Pract* 2008;14 Suppl 1:28-32. doi: 10.1080/13814780802436093 [published Online First: 2008/10/31]
17. Truyers C, Goderis G, Dewitte H, et al. The Intego database: background, methods and basic results of a Flemish general practice-based continuous morbidity registration project. *BMC Med Inform Decis Mak* 2014;14:48. doi: 10.1186/1472-6947-14-48 [published Online First: 2014/06/08]
18. Vanbeselaere V, Truyers C, Elli S, et al. Association between atrial fibrillation, anticoagulation, risk of cerebrovascular events and multimorbidity in general practice: a registry-based study. *BMC Cardiovasc Disord* 2016;16:61. doi: 10.1186/s12872-016-0235-1 [published Online First: 2016/03/30]
19. Okkes IM, Becker HW, Bernstein RM, et al. The March 2002 update of the electronic version of ICPC-2. A step forward to the use of ICD-10 as a nomenclature and a terminology for ICPC-2. *Fam Pract* 2002;19(5):543-6. [published Online First: 2002/10/03]
20. WHO Collaborating Centre for Drug Statistics Methodology: ATC/DDD Index 2010. Available at [http://www.whocc.no/atc\\_ddd\\_index](http://www.whocc.no/atc_ddd_index). Accessed February 28th, 2018.
21. Bartholomeeusen S, Kim CY, Mertens R, et al. The denominator in general practice, a new approach from the Intego database. *Fam Pract* 2005;22(4):442-7. doi: 10.1093/fampra/cm1054 [published Online First: 2005/06/21]
22. Benchimol EI, Smeeth L, Guttman A, et al. The REporting of studies Conducted using Observational Routinely-collected health Data (RECORD) statement. *PLoS Med* 2015;12(10):e1001885. doi: 10.1371/journal.pmed.1001885 [published Online First: 2015/10/07]
23. Greiver M, Williamson T, Bennett TL, et al. Developing a method to estimate practice denominators for a national Canadian electronic medical record database. *Fam Pract* 2013;30(3):347-54. doi: 10.1093/fampra/cms083 [published Online First: 2013/01/12]
24. Charlson ME, Pompei P, Ales KL, et al. A new method of classifying prognostic comorbidity in longitudinal studies: development and validation. *J Chronic Dis* 1987;40(5):373-83. [published Online First: 1987/01/01]
25. Shah AN, Vail TP, Taylor D, et al. Comorbid illness affects hospital costs related to hip arthroplasty: quantification of health status and implications for fair reimbursement and surgeon comparisons. *J Arthroplasty* 2004;19(6):700-5. [published Online First: 2004/09/03]
26. Linn BS, Linn MW, Gurel L. Cumulative illness rating scale. *J Am Geriatr Soc* 1968;16(5):622-6. doi: 10.1111/j.1532-5415.1968.tb02103.x [published Online First: 1968/05/01]
27. Piccirillo JF, Lacy PD, Basu A, et al. Development of a new head and neck cancer-specific comorbidity index. *Arch Otolaryngol Head Neck Surg* 2002;128(10):1172-9. doi: 10.1001/archotol.128.10.1172 [published Online First: 2002/10/09]
28. Knottnerus JA, Metsemakers J, Hoppener P, et al. Chronic illness in the community and the concept of 'social prevalence'. *Fam Pract* 1992;9(1):15-21. [published Online First: 1992/03/01]

- 1
- 2
- 3 29. Truyens C, Elli S, Goderis G, et al. [Dutch: 20 year General Practice in Flanders (1994-2013)].
- 4 Leuven: Acco, 2015. ISBN978-94-6292-129-0.
- 5 30. Kim HJ, Fay MP, Feuer EJ, et al. Permutation tests for joinpoint regression with applications to
- 6 cancer rates. *Stat Med* 2000;19(3):335-51. [published Online First: 2000/01/29]
- 7 31. Rea F, Pagan E, Compagnoni M, et al. Joinpoint regression analysis with time-on-study as time-
- 8 scale. Application to three Italian population-based cohort studies. *Epidemiology Biostatistics*
- 9 *and Public Health* 2017;14(3):e12616:1-8.
- 10 32. Yu B, Barrett MJ, Kim H-J, et al. Estimating joinpoints in continuous time scale for multiple
- 11 change-point models. *Computational Statistics & Data Analysis* 2007;51(5):2420-27. doi:
- 12 <https://doi.org/10.1016/j.csda.2006.07.044>
- 13 33. Clegg LX, Hankey BF, Tiwari R, et al. Estimating average annual per cent change in trend analysis.
- 14 *Stat Med* 2009;28(29):3670-82. doi: 10.1002/sim.3733 [published Online First: 2009/10/27]
- 15 34. Alan A. Categorical data analysis. 2nd ed: Wiley 2002.
- 16 35. Nivel database for primary care morbidity registration in the Netherlands. Available at
- 17 <https://www.nivel.nl/nl/>. Accessed, May 6th, 2018.
- 18 36. Osteoarthritis in general practice: data and perspectives. 2013. Available at
- 19 [www.arthritisresearchuk.org](http://www.arthritisresearchuk.org). Accessed, May 23th, 2018.
- 20 37. Cross M, Smith E, Hoy D, et al. The global burden of hip and knee osteoarthritis: estimates from
- 21 the global burden of disease 2010 study. *Ann Rheum Dis* 2014;73(7):1323-30. doi:
- 22 10.1136/annrheumdis-2013-204763 [published Online First: 2014/02/21]
- 23 38. de Rooij M, van der Leeden M, Cheung J, et al. Efficacy of Tailored Exercise Therapy on Physical
- 24 Functioning in Patients With Knee Osteoarthritis and Comorbidity: A Randomized Controlled
- 25 Trial. *Arthritis Care Res (Hoboken)* 2017;69(6):807-16. doi: 10.1002/acr.23013 [published
- 26 Online First: 2016/08/27]
- 27 39. Podmore B, Hutchings A, van der Meulen J, et al. Impact of comorbid conditions on outcomes of
- 28 hip and knee replacement surgery: a systematic review and meta-analysis. *BMJ Open*
- 29 2018;8(7):e021784. doi: 10.1136/bmjopen-2018-021784 [published Online First:
- 30 2018/07/13]
- 31 40. Calders P, Van Ginckel A. Presence of comorbidities and prognosis of clinical symptoms in knee
- 32 and/or hip osteoarthritis: A systematic review and meta-analysis. *Semin Arthritis Rheum*
- 33 2018;47(6):805-13. doi: 10.1016/j.semarthrit.2017.10.016 [published Online First:
- 34 2017/11/22]
- 35 41. Machado GC, Maher CG, Ferreira PH, et al. Efficacy and safety of paracetamol for spinal pain and
- 36 osteoarthritis: systematic review and meta-analysis of randomised placebo controlled trials.
- 37 *Bmj* 2015;350:h1225. doi: 10.1136/bmj.h1225 [published Online First: 2015/04/02]
- 38 42. Verkleij SP, Luijsterburg PA, Willemsen SP, et al. Effectiveness of diclofenac versus paracetamol in
- 39 knee osteoarthritis: a randomised controlled trial in primary care. *Br J Gen Pract*
- 40 2015;65(637):e530-7. doi: 10.3399/bjgp15X686101 [published Online First: 2015/07/28]
- 41 43. WHO Guidelines for the Regulatory Assessment of Medicinal Products for Use in Self-medication.
- 42 WHO/EDM/QSM/00.1. 2000. Available at: <https://apps.who.int/medicinedocs>. Accessed
- 43 September 11, 2019.
- 44 44. Conaghan PG. NSAIDs or paracetamol for short-term treatment of mild to moderate knee pain in
- 45 early osteoarthritis: are they equivalent? *Evid Based Med* 2016;21(1):14. doi:
- 46 10.1136/ebmed-2015-110289 [published Online First: 2015/10/21]
- 47 45. Deckers JG, Paget WJ, Schellevis FG, et al. European primary care surveillance networks: their
- 48 structure and operation. *Fam Pract* 2006;23(2):151-8. doi: 10.1093/fampra/cmi118
- 49 [published Online First: 2006/02/09]
- 50 46. Trotter JP. Patient registries: a new gold standard for "real world" research. *Ochsner J*
- 51 2002;4(4):211-4. [published Online First: 2002/10/01]
- 52 47. Alpert JM, Krist AH, Aycock RA, et al. Designing User-Centric Patient Portals: Clinician and
- 53 Patients' Uses and Gratifications. *Telemed J E Health* 2017;23(3):248-53. doi:
- 54 10.1089/tmj.2016.0096 [published Online First: 2016/06/23]
- 55
- 56
- 57
- 58
- 59
- 60

## Footnotes

**Contributors:** PM and DS performed the analyses, and DS, PV, RH, MS, FL, BV wrote the manuscript. DS, MS and BV are responsible for the study concept, design, the recruitment of subjects and acquisition of data. All authors participated in the interpretation of the data. All authors approved the final version of the manuscript.

**Funding:** the Flemish Government (Ministry of Health and Welfare) funds Intego on a regular basis. This work would not have been possible without the collaboration of all general practitioners of the Intego network. We hereby state the independence of the researchers from the funders.

**Disclaimer:** The funders had no role in the study design, data collection and analysis, decision to publish or preparation of the manuscript

**Competing interests:** None declared.

**Ethics approval:** The Intego project was presented to the Belgian Privacy Commission (no SCSZG/13/079) and approved by the ethical review board of the Medical School of the Catholic University of Leuven (N° ML 1723).

**Data sharing statement:** The dataset supporting the conclusions of this article is held at the University of Leuven, Belgium, and can be shared upon contacting the corresponding author.



## Figure legends

1. Figure 1. The standardized and non-standardized prevalence of patients with knee osteoarthritis by age cohorts in the Intego registry (1996-2015). Standardization was performed by taking the Flemish population of the year 1996 as reference population.
2. Figure 2. An overview of the observed and modeled trends in prevalence for men and women in the Intego registry (1996-2015). Observed (bullets) and modeled (trend line) age-standardized average annual percentage change (AAPC) in prevalence with 95% confidence intervals for time trends for patients with knee osteoarthritis in Intego register, 1996–2015. The AAPC is significantly different from zero at  $\alpha = 0.05$ .
3. Figure 3. The standardized and non-standardized incidence of patients with knee osteoarthritis in the Intego registry (1996-2015). Standardization was performed by taking the Flemish population of the year 1996 as reference population.

## Supplementary file list

1. Supplementary file 1. Number of people in the yearly contact group (by gender and age cohort) in Intego (1996-2015).
2. Supplementary file 2. Participation of GP practices in Intego (1996-2015).
3. Supplementary file 3. ICPC codes and description of codes for the disease count.
4. Supplementary file 4. ACT coding for pharmacological agents used in the management of knee osteoarthritis.
5. Supplementary file 5. Demographic characteristics of patients with knee osteoarthritis in Intego (1996, 2005 and 2015).
6. The Record checklist.

Table 1. Demographic characteristics and trends in prevalence and incidence of patients with knee osteoarthritis in the Intego registry (1996-2015).

|                                          | <b>Year<br/>1996*</b> | <b>Year<br/>2015*</b> | <b>Overall<br/>trend***</b> | <b>Trend 1</b> |                             | <b>Trend 2</b> |                           | <b>Trend 3</b> |                             |
|------------------------------------------|-----------------------|-----------------------|-----------------------------|----------------|-----------------------------|----------------|---------------------------|----------------|-----------------------------|
|                                          | <b>%</b>              | <b>%</b>              | <b>AAPC<br/>[95% CI]</b>    | <b>Years</b>   | <b>APC<br/>[95% CI]</b>     | <b>Years</b>   | <b>APC<br/>[95% CI]</b>   | <b>Years</b>   | <b>APC<br/>[95% CI]</b>     |
| <b>Prevalence</b>                        |                       |                       |                             |                |                             |                |                           |                |                             |
| <b>Total</b>                             | 1.99                  | 3.56                  | <b>2.5</b><br>[2.2;2.9]     | 1996-<br>2015  | <b>2.5</b><br>[2.2;2.9]     |                |                           |                |                             |
| <b>Men</b>                               | 1.32                  | 2.59                  | <b>3.1</b><br>[2.7;3.5]     | 1996-<br>2015  | <b>3.1</b><br>[2.7;3.5]     |                |                           |                |                             |
| <b>Women</b>                             | 2.64                  | 4.55                  | <b>2.4</b><br>[2.0;2.7]     | 1996-<br>2015  | <b>2.4</b><br>[2.0;2.7]     |                |                           |                |                             |
| <b>Prevalence<br/>by age<br/>group**</b> |                       |                       |                             |                |                             |                |                           |                |                             |
| <b>25-34</b>                             | 0.68                  | 1.82                  | <b>4.7</b><br>[3.7;5.6]     | 1996-<br>2007  | <b>7.7</b><br>[6.4;9.1]     | 2007-<br>2015  | <b>0.6</b><br>[-0.9;2.1]  |                |                             |
| <b>35-44</b>                             | 0.70                  | 2.21                  | <b>5.5</b><br>[4.3;6.7]     | 1996-<br>2011  | <b>4.5</b><br>[3.6;5.4]     | 2011-<br>2015  | <b>9.5</b><br>[4.3;15.0]  |                |                             |
| <b>45-54</b>                             | 1.55                  | 3.14                  | <b>4.0</b><br>[3.3;4.8]     | 1996-<br>2011  | <b>3.4</b><br>[2.8;4.0]     | 2011-<br>2015  | <b>6.5</b><br>[3.2;10.0]  |                |                             |
| <b>55-64</b>                             | 2.96                  | 5.60                  | <b>3.0</b><br>[2.6;3.4]     | 1996-<br>2015  | <b>3.0</b><br>[2.6;3.4]     |                |                           |                |                             |
| <b>65-74</b>                             | 6.08                  | 8.97                  | <b>1.7</b><br>[1.3;2.2]     | 1996-<br>2015  | <b>1.7</b><br>[1.3;2.2]     |                |                           |                |                             |
| <b>75-84</b>                             | 7.80                  | 13.9                  | <b>2.6</b><br>[2.0;3.2]     | 1996-<br>2007  | <b>3.6</b><br>[2.7;4.5]     | 2007-<br>2015  | <b>1.2</b><br>[0.2;2.1]   |                |                             |
| <b>≥ 85</b>                              | 6.27                  | 15.0                  | <b>3.0</b><br>[2.4;3.5]     | 1996-<br>2015  | <b>3.0</b><br>[2.4;3.5]     |                |                           |                |                             |
| <b>Incidence</b>                         |                       |                       |                             |                |                             |                |                           |                |                             |
| <b>Total</b>                             | 0.42                  | 0.38                  | <b>-0.5</b><br>[-1.4;0.5]   | 1996-<br>2006  | <b>-2.6</b><br>[-4.0;-1.1]  | 2006-<br>2015  | <b>1.9</b><br>[0.4;3.5]   |                |                             |
| <b>Men</b>                               | 0.27                  | 0.26                  | <b>-0.2</b><br>[-1.4;1.1]   | 1996-<br>2006  | <b>-2.5</b><br>[-4.4;-0.5]  | 2006-<br>2015  | <b>2.5</b><br>[0.5;4.5]   |                |                             |
| <b>Women</b>                             | 0.58                  | 0.49                  | <b>-0.5</b><br>[-2.4;1.4]   | 1996-<br>1999  | <b>-8.7</b><br>[-16.2;-0.6] | 1999-<br>2013  | <b>-0.4</b><br>[-1.2;0.5] | 2013-<br>2015  | <b>11.8</b> [-<br>3.3;29.3] |

**Legend:**

AAPC, average annual percentage change; APC, annual percentage change; CI, confidence interval

1  
2  
3 \* These percentages are standardized for the total Flemish population.

4 \*\* Standardization was possible for the total population, but not for specific age cohorts.

5 \*\*\* Joinpoint regression modelling was used to estimate (A) APC in prevalence and incidence trends. Three possible trends were  
6 calculated during the 20-year study period.

7 **Statistically significant differences for (A) APC are indicated in bold.**  
8  
9  
10  
11  
12  
13  
14  
15  
16  
17  
18  
19  
20  
21  
22  
23  
24  
25  
26  
27  
28  
29  
30  
31  
32  
33  
34  
35  
36  
37  
38  
39  
40  
41  
42  
43  
44  
45  
46  
47  
48  
49  
50  
51  
52  
53  
54  
55  
56  
57  
58  
59  
60

Table 2. Trends in multimorbidity of the patients with knee osteoarthritis in the Intego registry (1996-2015).

| Variables                      | 1996-2000   | 2001-2005   | 2006-2010   | 2011-2015*  | p-value** |
|--------------------------------|-------------|-------------|-------------|-------------|-----------|
| <b>Mean age (± SD)</b>         | 55.3 (21.9) | 57.6 (20.5) | 57.8 (19.8) | 56.9 (19.8) | 0.384     |
| <b>Women, n (%)</b>            | 972 (65%)   | 1234 (65%)  | 1419 (64%)  | 1412 (62%)  | 0.05224   |
| <b>Incidence, n***</b>         | 1503        | 1912        | 2202        | 2288        |           |
| <b>Comorbidities, n (%)</b>    |             |             |             |             |           |
| <b>Hypertension</b>            | 359 (24%)   | 485 (25%)   | 623 (28%)   | 593 (26%)   | 0.0756    |
| <b>Diabetes</b>                | 93 (6%)     | 161 (8%)    | 252 (11%)   | 346 (15%)   | <0.001    |
| <b>CV events</b>               | 323 (21%)   | 480 (25%)   | 597 (27%)   | 614 (27%)   | <0.001    |
| <b>GI complication (ulcer)</b> | 28 (2%)     | 60 (3%)     | 59 (3%)     | 61 (3%)     | 0.3585    |
| <b>Renal failure</b>           | 23 (2%)     | 70 (4%)     | 71 (3%)     | 66 (3%)     | 0.1025    |
| <b>Depression</b>              | 141 (9%)    | 230 (12%)   | 259 (12%)   | 287 (13%)   | 0.009     |
| <b>Obesity</b>                 | 74 (5%)     | 101 (5%)    | 145 (7%)    | 191 (8%)    | <0.001    |
| <b>Osteoporosis</b>            | 57 (4%)     | 81 (4%)     | 107 (5%)    | 103 (5%)    | 0.2303    |
| <b>Cancer</b>                  | 29 (2%)     | 60 (3%)     | 59 (3%)     | 61 (3%)     | <0.001    |
| <b>Asthma</b>                  | 125 (8%)    | 205 (11%)   | 328 (15%)   | 392 (17%)   | <0.001    |
| <b>Substance abuse</b>         | 4 (0%)      | 22 (1%)     | 31 (1%)     | 48 (2%)     | <0.001    |
| <b>Disease burden, n</b>       | 1.6267      | 1.8383      | 2.1848      | 2.3387      | <0.001    |

**Legend:**

\* Four time intervals of five years were defined to evaluate trends for incident patients with knee osteoarthritis.

\*\* *P-value* for the comorbidities was calculated with the Cochran-Armitage trend test; *p-value* for age was calculated with the Jonckheere-Terpstra trend test.

\*\*\* Multimorbidity was measured for all incident cases with knee osteoarthritis.

Table 3. Trends in medication use of patients with knee osteoarthritis in the Intego registry (1996-2015).

| Group/<br>Medication                    | Prev. in |             | Overall trend             | Trend 1                               | Trend 2                                | Trend 3 <sup>‡</sup>              |
|-----------------------------------------|----------|-------------|---------------------------|---------------------------------------|----------------------------------------|-----------------------------------|
|                                         | 1996     | 2015        | AAPC [95% CI]             | Years<br>APC<br>[95% CI]              | Years<br>APC<br>[95% CI]               | Years<br>APC<br>[95% CI]          |
| <b>Acetaminophen</b>                    | 5.3      | 19.2        | <b>6.7 [5.6-7.7]</b>      | 1996-2010<br><b>8.0 [6.8-9.2]</b>     | 2010-2015<br><b>3.1 [0.3;5.9]</b>      |                                   |
| Males                                   | 5.2      | 17.4        | <b>5.8 [4.9-6.6]</b>      |                                       |                                        |                                   |
| Females                                 | 5.4      | <b>20.2</b> | <b>7.0 [5.8-8.3]</b>      | 1996-2010<br><b>8.7 [7.3;10.1]</b>    | 2010-2015<br>2.7 [-0.6;6.0]            |                                   |
| <b>Oral NSAID<br/>(exclusion cox-2)</b> | 28.4     | 29.4        | 0.0 [-1.1;1.1]            | 1996-2002<br>-1.0 [-3.5;1.6]          | 2002-2008<br>2.4 [-0.1;5.0]            | 2008-2015<br>-1.2 [-2.4;0.1]      |
| Males                                   | 28.6     | 28.8        | 0.5 [-0.2;1.2]            | 1996-2009<br><b>1.1 [0.4;1.9]</b>     | 2009-2015<br>0.5 [-0.2;1.2]            |                                   |
| Females                                 | 28.3     | 29.6        | 0.3 [-0.1;0.8]            |                                       |                                        |                                   |
| <b>Cox-2 selective<br/>NSAID</b>        | 3.0      | 2.3         | -7.7 [-36.0; 33.0]        | 2000-2004<br>-2.7 [-29.3;33.9]        | 2004-2007<br>-48.4 [-93.5; 309.5]      | 2007-2015<br>11.8 [-3.4;29.5]     |
| Males                                   | 2.2      | 1.8         | <b>-13.3 [-19.3;-6.7]</b> |                                       |                                        |                                   |
| Females                                 | 3.4      | 2.7         | -7.3 [-34.0;30.1]         | 2000-2004<br>-3.3 [-29.1;32.0]        | 2004-2007<br>-47.2 [-92.2; 257.6]      | 2007-2015<br>12.0 [-2.9;29.2]     |
| <b>Topical NSAID</b>                    | 7.8      | 5.9         | -1.0 [-2.4; 0.4]          | 1996-2003<br><b>-4.7 [-8.1;-1.2]</b>  | 2003-2015<br>1.2 [-0.0;2.4]            |                                   |
| Males                                   | 9.3      | 5.8         | -0.9 [-2.2;0.5]           |                                       |                                        |                                   |
| Females                                 | 7.1      | 5.9         | -0.8 [-2.3;0.7]           | 1996-2003<br><b>-4.3 [-8.0;-0.4]</b>  | 2003-2015<br>1.3 [-0.0;2.6]            |                                   |
| <b>Weak opioids</b>                     | 2.8      | 6.1         | <b>4.0 [0.9;7.3]</b>      | 1996-1998<br><b>36.3 [0.4;85.2]</b>   | 1998-2009<br>-0.9 [-2.3;0.5]           | 2009-2015<br><b>4.0 [1.6;6.4]</b> |
| Males                                   | 1.5      | 5.2         | <b>2.9 [1.5;4.4]</b>      |                                       |                                        |                                   |
| Females                                 | 3.3      | 6.7         | 2.8 [-0.0;5.7]            | 1996-2000<br><b>14.7 [1.6;29.4]</b>   | 2000-2008<br>-3.2 [-6.4;0.2]           | 2008-2015<br><b>3.5 [0.6;6.4]</b> |
| <b>Strong opioids</b>                   | 2.5      | 4.3         | 1.9 [-0.4;4.3]            | 1996-2003<br><b>9.0 [2.5;16.0]</b>    | 2003-2015<br><b>-2.0 [-3.7;-0.3]</b>   |                                   |
| Males                                   | 1.7      | 3.6         | -0.2 [-2.0; 1.6]          |                                       |                                        |                                   |
| Females                                 | 2.9      | 4.7         | <b>2.3 [0.3;4.3]</b>      | 1996-2003<br><b>10.0 [4.4;15.9]</b>   | 2003-2015<br><b>-2.0 [-3.4;-0.5]</b>   |                                   |
| <b>Parenteral<br/>glucocorticoids</b>   | 9.1      | 8.1         | -0.7 [-1.8;0.5]           | 1996-2005<br><b>-2.1 [-3.5;-0.7]</b>  | 2005-2012<br><b>2.7 [0.8;4.7]</b>      | 2012-2015<br>-4.1 [-9.2;1.2]      |
| Males                                   | 8.1      | 8.6         | <b>0.8 [0.0;1.6]</b>      |                                       |                                        |                                   |
| Females                                 | 9.6      | 7.9         | <b>-1.3 [-2.6; 0.0]</b>   | 1996-2003<br><b>-3.8 [-6.0;-1.5]</b>  | 2003-2012<br><b>2.0 [0.6;3.4]</b>      | 2012-2015<br>-5.1 [-10.7;0.8]     |
| <b>Glucosamine*</b>                     | 0.6      | 1.8         | <b>8.6 [2.4;15.1]</b>     | 2001-2004<br><b>64.1 [25.0;115.3]</b> | 2004-2011<br><b>-9.6 [-14.3;-4.4]</b>  | 2011-2015<br>9.8 [-0.6;21.2]      |
| Males                                   | 0.1      | 1.8         | 17.3 [-18.8; 69.5]        | 2001-2003<br>212.4 [-83.1;566.4.3]    | 2003-2015<br>-0.4 [-4.8;4.2]           |                                   |
| Females                                 | 0.9      | 1.8         | <b>6.8 [0.4;13.7]</b>     | 2001-2004<br><b>56.7 [18.3;107.5]</b> | 2004-2011<br><b>-10.0 [-15.3;-4.3]</b> | 2011-2015<br>8.2 [-3.6;21.4]      |

**Legend:**

AAPC, average annual percentage change; APC, annual percentage change; CI, confidence interval; Prev., prevalence

\*glucosamine: registration starts from 2001; cox-2 selective NSAID starts from 2000

**Bold:** indicates that the (A)APC is significantly different from zero at the alpha= 0.05 level

**‡**= three possible time trends were computed with the joinpoint regression analysis. The corresponding time cohorts and APC are mentioned in these three columns

Figure 1.

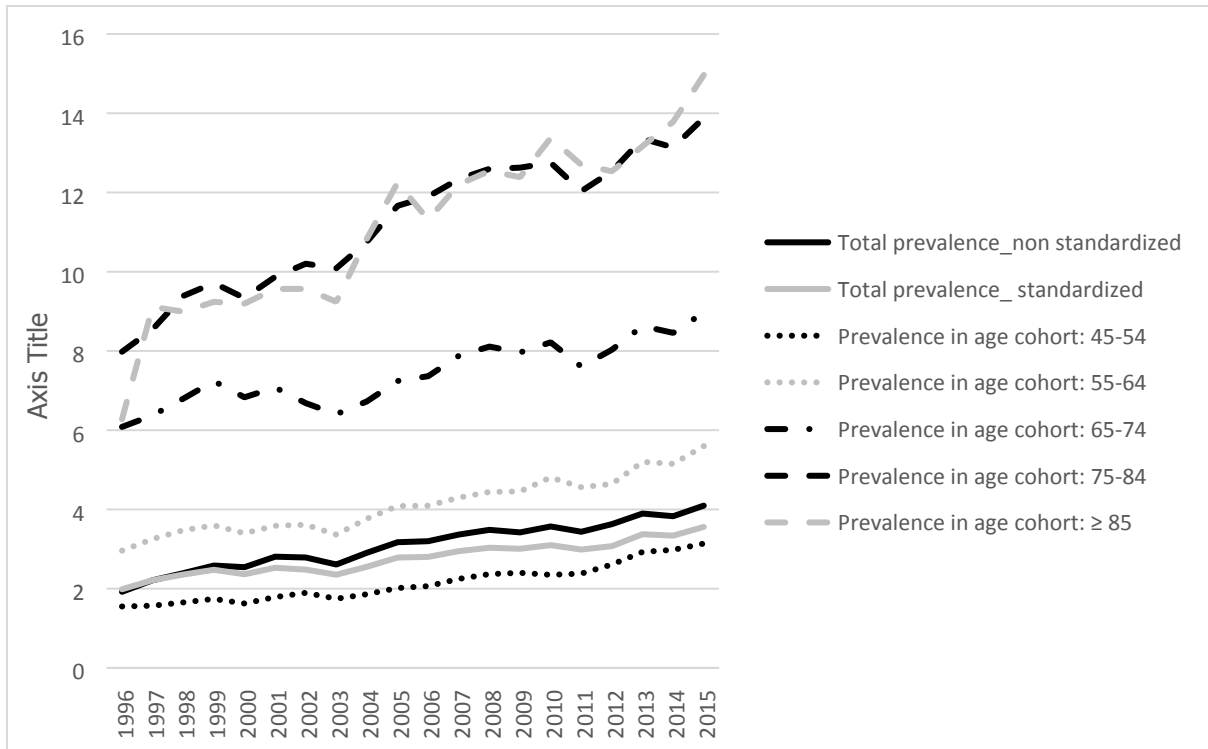

review only

Figure 2.

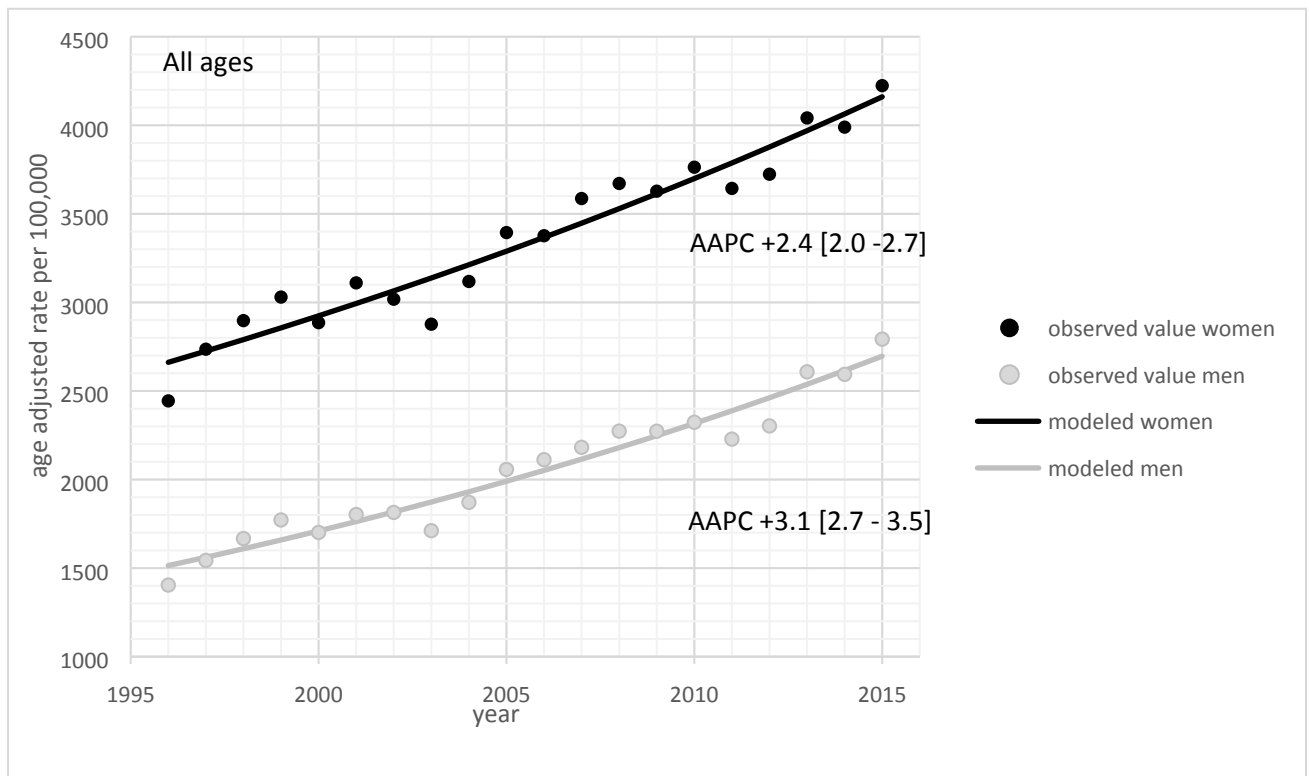

Review only



Figure 3.

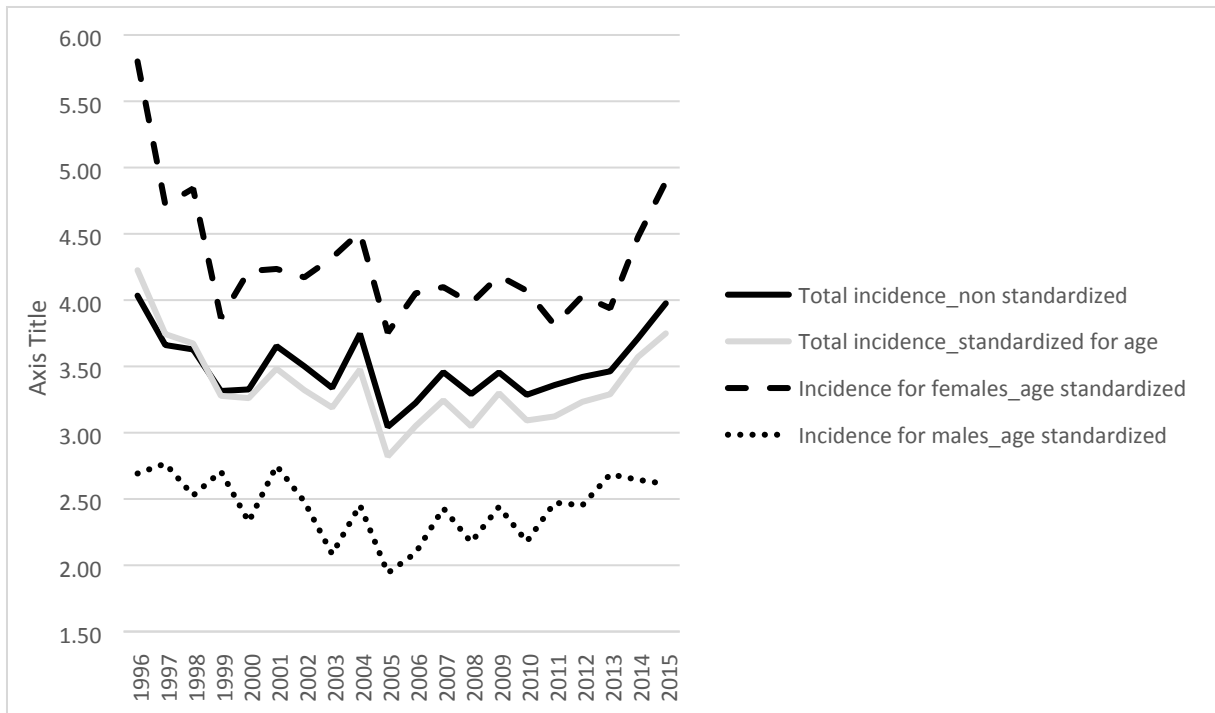

review only

## Number of people in the yearly contact group (by gender and age cohort) in Intego (1996-2015)

| Year                                        | 1996  | 1997  | 1998  | 1999  | 2000  | 2001  | 2002   | 2003   | 2004   | 2005   |
|---------------------------------------------|-------|-------|-------|-------|-------|-------|--------|--------|--------|--------|
| <b>Yearly contact group</b>                 | 83011 | 81763 | 85940 | 86535 | 95932 | 90973 | 106664 | 125202 | 120962 | 128251 |
| <b>Total prevalence knee osteoarthritis</b> | 1595  | 1809  | 2055  | 2236  | 2439  | 2554  | 2973   | 3268   | 3516   | 4069   |
| <b>By gender</b>                            |       |       |       |       |       |       |        |        |        |        |
| Male                                        | 39648 | 38927 | 40796 | 41252 | 45478 | 43325 | 50857  | 59759  | 57700  | 61446  |
| Female                                      | 43363 | 42836 | 45144 | 45283 | 50454 | 47648 | 55807  | 65443  | 63262  | 66805  |
| <b>By age cohort</b>                        |       |       |       |       |       |       |        |        |        |        |
| ≤ 14 year                                   | 13144 | 13180 | 13416 | 13044 | 13150 | 12585 | 15485  | 18458  | 17033  | 18223  |
| 15-24 year                                  | 10588 | 10532 | 11077 | 11162 | 12015 | 11652 | 13623  | 15966  | 15109  | 16071  |
| 25-34 year                                  | 14859 | 13322 | 13741 | 13243 | 14185 | 12899 | 14699  | 17477  | 16617  | 17538  |
| 35-44 year                                  | 13919 | 13462 | 14123 | 14240 | 16502 | 14404 | 16189  | 19282  | 18303  | 19040  |
| 45-54 year                                  | 9993  | 10315 | 11193 | 11599 | 13405 | 12812 | 14933  | 17469  | 17199  | 18450  |
| 55-64 year                                  | 8107  | 8148  | 8633  | 8675  | 9798  | 9729  | 11704  | 13731  | 13754  | 14826  |
| 65-74 year                                  | 7266  | 7357  | 7755  | 8027  | 9121  | 8943  | 10488  | 11961  | 11950  | 12247  |
| 75-84 year                                  | 3797  | 3955  | 4367  | 4694  | 5559  | 5785  | 7097   | 8218   | 8414   | 8900   |
| ≥ 85 year                                   | 1338  | 1492  | 1635  | 1851  | 2197  | 2164  | 2446   | 2640   | 2583   | 2956   |

| Year                        | 2006   | 2007   | 2008   | 2009   | 2010   | 2011   | 2012   | 2013   | 2014   | 2015   |
|-----------------------------|--------|--------|--------|--------|--------|--------|--------|--------|--------|--------|
| <b>Yearly contact group</b> | 133931 | 132322 | 134733 | 140259 | 140126 | 151971 | 127717 | 130398 | 131651 | 123261 |
| <b>Total prevalence</b>     | 4284   | 4454   | 4695   | 4798   | 5003   | 5223   | 4635   | 5081   | 5041   | 5049   |
| <b>Knee osteoarthritis</b>  |        |        |        |        |        |        |        |        |        |        |
| <b>By gender</b>            |        |        |        |        |        |        |        |        |        |        |
| Male                        | 64012  | 63472  | 64423  | 67305  | 67075  | 72892  | 60829  | 62541  | 63404  | 58841  |
| Female                      | 69919  | 68850  | 70310  | 72954  | 73051  | 79079  | 66888  | 67857  | 68247  | 64420  |
| <b>By age cohort</b>        |        |        |        |        |        |        |        |        |        |        |
| ≤ 14 year                   | 18928  | 18958  | 19145  | 20714  | 20531  | 22279  | 18728  | 19854  | 19711  | 19091  |
| 15-24 year                  | 16841  | 16697  | 17065  | 17670  | 17483  | 18837  | 15337  | 15772  | 15962  | 14645  |
| 25-34 year                  | 18551  | 18311  | 18916  | 20113  | 20003  | 21668  | 18264  | 18804  | 19578  | 17818  |
| 35-44 year                  | 19640  | 18767  | 18672  | 19137  | 18627  | 19883  | 16597  | 16865  | 17434  | 15937  |
| 45-54 year                  | 19379  | 19220  | 19595  | 20210  | 20345  | 22093  | 17972  | 18207  | 18220  | 16950  |
| 55-64 year                  | 15512  | 15636  | 16054  | 16523  | 16827  | 18570  | 15657  | 15827  | 16037  | 15415  |
| 65-74 year                  | 12372  | 12135  | 12108  | 12347  | 12363  | 13780  | 11505  | 11567  | 11494  | 11169  |
| 75-84 year                  | 9305   | 9214   | 9439   | 9694   | 9835   | 10388  | 9070   | 8938   | 8601   | 8140   |
| ≥ 85 year                   | 3403   | 3384   | 3739   | 3851   | 4112   | 4473   | 4587   | 4564   | 4614   | 4096   |

Participation of GP practices in Intego (1996-2015)

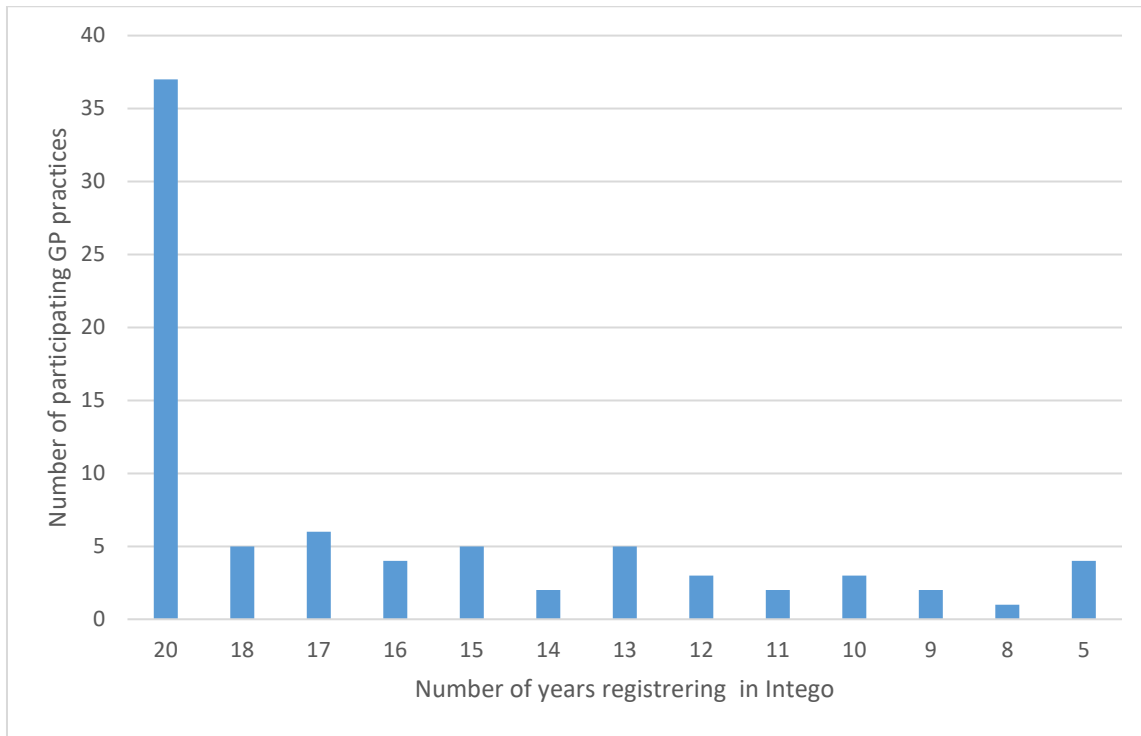

Review only

## ICPC codes and description of codes for the disease count

### Codes to measure the disease count

The combination of the following 92 ICPC-2 codes were used to measure the disease count. If codes are not mutually exclusive (e.g. T89 and T90), then they count for one.

| ICPC code | Description                        |
|-----------|------------------------------------|
| A79       | Malignancy NOS                     |
| A90       | Congenital anomaly OS/multiple     |
| B72       | Hodgkin's disease/lymphoma         |
| B73       | Leukaemia                          |
| B74       | Malignant neoplasm blood other     |
| B78       | Hereditary haemolytic anaemia      |
| B83       | Purpura/coagulation defect         |
| B90       | HIV-infection/aids                 |
| D74       | Malignant neoplasm stomach         |
| D75       | Malignant neoplasm colon/rectum    |
| D76       | Malignant neoplasm pancreas        |
| D77       | Malig. neoplasm digest other/NOS   |
| F83       | Retinopathy                        |
| F84       | Macular degeneration               |
| F94       | Blindness                          |
| H83       | Otosclerosis                       |
| H84       | Presbycusis                        |
| H86       | Deafness                           |
| K74       | Ischaemic heart disease w. angina  |
| K75       | Acute myocardial infarction        |
| K76       | Ischaemic heart disease w/o angina |
| K77       | Heart failure                      |
| K82       | Pulmonary heart disease            |
| K86       | Hypertension uncomplicated         |
| K87       | Hypertension complicated           |
| K90       | Stroke/cerebrovascular accident    |
| K91       | Cerebrovascular disease            |
| K92       | Atherosclerosis/PVD                |
| K93       | Pulmonary embolism                 |
| K94       | Phlebitis/thrombophlebitis         |
| L84       | Back syndrome w/o radiating pain   |
| L85       | Acquired deformity of spine        |
| L88       | Reumatoide arthritis               |
| L89       | Osteoarthritis of hip              |
| L90       | Osteoarthritis of knee             |
| L91       | Osteoarthritis other               |
| L95       | Osteoporosis                       |
| L98       | Acquired deformity of limb         |
| N70       | Poliomyelitis                      |
| N74       | Malignant neoplasm nervous system  |
| N85       | Congenital anomaly neurological    |
| N86       | Multiple sclerosis                 |
| N87       | Parkinsonism                       |

|     |                                       |
|-----|---------------------------------------|
| N88 | Epilepsy                              |
| N89 | Migraine                              |
| N90 | Cluster headache                      |
| N92 | Trigeminal neuralgia                  |
| P15 | Substance abuse: chronic alcohol      |
| P28 | Limited function/disability (p)       |
| P70 | Dementia                              |
| P71 | Organic psychosis other               |
| P72 | Schizophrenia                         |
| P73 | Affective psychosis                   |
| P74 | Anxiety disorder/anxiety state        |
| P75 | Somatization disorder                 |
| P76 | Depressive disorder                   |
| P77 | Suicide/suicide attempt               |
| P79 | Phobia/compulsive disorder            |
| P80 | Personality disorder                  |
| P85 | Mental retardation                    |
| P98 | Psychosis NOS/other                   |
| R79 | Chronic bronchitis                    |
| R84 | Malignant neoplasm bronchus/lung      |
| R85 | Malignant neoplasm respiratory, other |
| R95 | Chronic obstructive pulmonary disease |
| R96 | Asthma                                |
| S77 | Malignant neoplasm of skin            |
| S87 | Dermatitis/atopic eczema              |
| S91 | Psoriasis                             |
| S97 | Chronic ulcer skin                    |
| T71 | Malignant neoplasm thyroid            |
| T80 | Congenital anom endocrine/metab.      |
| T85 | Hyperthyroidism/thyrototoxicosis      |
| T86 | Hypothyroidism/myxoedema              |
| T89 | Diabetes insulin dependent            |
| T90 | Diabetes non-insulin dependent        |
| T92 | Gout                                  |
| T93 | Lipid disorder                        |
| T99 | Endocrine/metab/nutrit. dis. other    |
| U04 | Incontinence urine                    |
| U75 | Malignant neoplasm of kidney          |
| U76 | Malignant neoplasm of bladder         |
| U77 | Malignant neoplasm urinary other      |
| U85 | Congenital anomaly urinary tract      |
| U88 | Glomerulonephritis/nephrosis          |
| W72 | Malignant neoplasm relate to preg.    |
| X75 | Malignant neoplasm cervix             |
| X76 | Malignant neoplasm breast female      |
| X77 | Malignant neoplasm genital other (f)  |
| Y77 | Malignant neoplasm prostate           |
| Y78 | Malign neoplasm male genital other    |
| Y85 | Benign prostatic hypertrophy          |

### Other ICPC codes used in this manuscript

| ICPC code | description                                             |
|-----------|---------------------------------------------------------|
| P17       | Substance abuse: tobacco                                |
| P19       | Substance abuse: drug abuse                             |
| L89       | Osteoarthritis of the hip                               |
| L90       | Osteoarthritis of the knee                              |
| L91       | Osteoarthritis of other locations (other than knee/hip) |

### ICPC codes used with Intego software to define comorbidity

#### Definition of cancer

Intego uses a set of 22 ICPC-2 codes to define cancer as a comorbidity: A79, B73, B72, B74, D74, D75, D76, D77, L71, N74, R84, R85, T71, U75, U76, U77, W72, X75, X76, X77, Y77, and Y78.

#### Definition of substance abuse

Intego uses a combination of three ICPC-2 codes to define substance abuse: P15, P 17, and P19.

ACT coding for pharmacological agents used in the management of knee osteoarthritis.

|                                        | <b>ACT coding</b>                                                                                                     |
|----------------------------------------|-----------------------------------------------------------------------------------------------------------------------|
| Acetaminophen                          | N02BE01                                                                                                               |
| Oral NSAID (exclusion cox-2 selective) | M01AB<br>M01AC-M01AE<br>M01AG                                                                                         |
| COX-2 selective NSAID                  | M01AH                                                                                                                 |
| Topical NSAID                          | M02AA                                                                                                                 |
| Glucosamine supplements                | M01AX05                                                                                                               |
| Chondroitin supplements                | M01AX25                                                                                                               |
| Hyaluronic acid                        | M09AX01                                                                                                               |
| Weak opioids                           | N02AX02<br>N02AJ01<br>N02AJ02<br>N02AJ03<br>N02AJ06<br>N02AJ07<br>N02AJ08<br>N02AJ09<br>N02AJ13<br>N02AJ14<br>N02AJ15 |
| Strong opioids                         | N02AA<br>N02AB<br>N02AC<br>N02AD<br>N02AE<br>N02AF                                                                    |
| Glucocorticoids                        | H02AB                                                                                                                 |



## Demographic characteristics of patients with knee osteoarthritis in Intego registry (1996, 2005, and 2015).

|                                          | 1996***     |                                                 | 2005        |                                                 | 2015        |                                                 |
|------------------------------------------|-------------|-------------------------------------------------|-------------|-------------------------------------------------|-------------|-------------------------------------------------|
|                                          | n/N         | %<br>Non-<br>standardized<br>vs<br>standardized | n/N         | %<br>Non-<br>standardized<br>vs<br>standardized | n/N         | %<br>Non-<br>standardized<br>vs<br>standardized |
| <b>Prevalence,<br/>gender</b>            |             |                                                 |             |                                                 |             |                                                 |
| <b>Total</b>                             | 1.595/83011 | 1.92; 1.99                                      | 4069/128251 | 3.17;2.79                                       | 5049/123261 | 4.09; 3.56                                      |
| <b>Men</b>                               | 518/39648   | 1.31; 1.32                                      | 1348/61446  | 2.20;1.97                                       | 1817/58841  | 3.09; 2.59                                      |
| <b>Women</b>                             | 1077/43363  | 2.48; 2.64                                      | 2721/66805  | 4.07;3.67                                       | 3232/64420  | 5.02;4.55                                       |
| <b>Prevalence,<br/>age<br/>cohorts**</b> |             |                                                 |             |                                                 |             |                                                 |
| <b>25-34</b>                             | 101         | 0.68                                            | 272         | 1.55                                            | 324         | 1.82                                            |
| <b>35-44</b>                             | 98          | 0.70                                            | 225         | 1.18                                            | 353         | 2.22                                            |
| <b>45-54</b>                             | 155         | 1.55                                            | 372         | 2.01                                            | 532         | 3.13                                            |
| <b>55-64</b>                             | 240         | 2.96                                            | 606         | 4.08                                            | 863         | 5.60                                            |
| <b>65-74</b>                             | 442         | 6.08                                            | 887         | 7.24                                            | 1002        | 9.00                                            |
| <b>75-84</b>                             | 303         | 7.98                                            | 1038        | 11.66                                           | 1130        | 13.9                                            |
| <b>≥ 85</b>                              | 84          | 6.28                                            | 362         | 12.24                                           | 613         | 15.0                                            |
| <b>Incidence,<br/>gender</b>             |             |                                                 |             |                                                 |             |                                                 |
| <b>Total</b>                             | 325/81416   | 0.40; 0.42                                      | 378/124182  | 0.30;0.28                                       | 470/118212  | 0.40; 0.38                                      |
| <b>Men</b>                               | 102/39130   | 0.26; 0.27                                      | 129/60098   | 0.21;0.19                                       | 167/57024   | 0.29; 0.26                                      |
| <b>Women</b>                             | 223/42286   | 0.53; 0.58                                      | 249/64084   | 0.39;0.38                                       | 303/61188   | 0.50;0.49                                       |

### **Legend:**

**N=**yearly contact group: the number of patients that visited their general practitioner at least once during once year

**\*the first %** refers to the age-specific data from the Intego register; the second % is the standardized Intego data for the total Flemish population.

**\*\*** Standardization was possible for the total population, but not for specific age cohorts.

**\*\*\*** Data are available for 20-year period. In this table 10-year interval periods are described.

## The RECORD statement

Checklist of items, extended from the STROBE statement that should be reported in observational studies using routinely collected health data.

|                           | Item No. | STROBE items                                                                                                                                                                               | Location in manuscript where items are reported | RECORD items                                                                                                                                                                                                                                                                                                                                                                                                                                       | Location in manuscript where items are reported                                                  |
|---------------------------|----------|--------------------------------------------------------------------------------------------------------------------------------------------------------------------------------------------|-------------------------------------------------|----------------------------------------------------------------------------------------------------------------------------------------------------------------------------------------------------------------------------------------------------------------------------------------------------------------------------------------------------------------------------------------------------------------------------------------------------|--------------------------------------------------------------------------------------------------|
| <b>Title and abstract</b> |          |                                                                                                                                                                                            |                                                 |                                                                                                                                                                                                                                                                                                                                                                                                                                                    |                                                                                                  |
|                           | 1        | (a) Indicate the study's design with a commonly used term in the title or the abstract (b) Provide in the abstract an informative and balanced summary of what was done and what was found |                                                 | <p>RECORD 1.1: The type of data used should be specified in the title or abstract. When possible, the name of the databases used should be included.</p> <p>RECORD 1.2: If applicable, the geographic region and timeframe within which the study took place should be reported in the title or abstract.</p> <p>RECORD 1.3: If linkage between databases was conducted for the study, this should be clearly stated in the title or abstract.</p> | <p>1.1: Title (Title page and abstract)</p> <p>1.2 Geographic region: abstract</p> <p>1.3 NA</p> |
| <b>Introduction</b>       |          |                                                                                                                                                                                            |                                                 |                                                                                                                                                                                                                                                                                                                                                                                                                                                    |                                                                                                  |
| Background rationale      | 2        | Explain the scientific background and rationale for the investigation being reported                                                                                                       |                                                 |                                                                                                                                                                                                                                                                                                                                                                                                                                                    | Introduction, p.2, paragraph 1-4                                                                 |
| Objectives                | 3        | State specific objectives, including any prespecified hypotheses                                                                                                                           |                                                 |                                                                                                                                                                                                                                                                                                                                                                                                                                                    | Introduction, p.2, paragraph 4                                                                   |
| <b>Methods</b>            |          |                                                                                                                                                                                            |                                                 |                                                                                                                                                                                                                                                                                                                                                                                                                                                    |                                                                                                  |
| Study Design              | 4        | Present key elements of study design early in the paper                                                                                                                                    |                                                 |                                                                                                                                                                                                                                                                                                                                                                                                                                                    | Methods, p. 3, design                                                                            |

|                                                                                                                                                                 |                              |   |                                                                                                                                                                                                                                                                                                                                                                                                                                                                                                                                                                                                                                                                                                                              |                                                                                                                                                                                                                                                                                                                                                                                                                                                                                                                                                                                                                                                                                                      |                                                                                                                                                                                                                 |
|-----------------------------------------------------------------------------------------------------------------------------------------------------------------|------------------------------|---|------------------------------------------------------------------------------------------------------------------------------------------------------------------------------------------------------------------------------------------------------------------------------------------------------------------------------------------------------------------------------------------------------------------------------------------------------------------------------------------------------------------------------------------------------------------------------------------------------------------------------------------------------------------------------------------------------------------------------|------------------------------------------------------------------------------------------------------------------------------------------------------------------------------------------------------------------------------------------------------------------------------------------------------------------------------------------------------------------------------------------------------------------------------------------------------------------------------------------------------------------------------------------------------------------------------------------------------------------------------------------------------------------------------------------------------|-----------------------------------------------------------------------------------------------------------------------------------------------------------------------------------------------------------------|
| 1<br>2<br>3<br>4                                                                                                                                                | Setting                      | 5 | Describe the setting, locations, and relevant dates, including periods of recruitment, exposure, follow-up, and data collection                                                                                                                                                                                                                                                                                                                                                                                                                                                                                                                                                                                              |                                                                                                                                                                                                                                                                                                                                                                                                                                                                                                                                                                                                                                                                                                      | Methods, pp. 3-4, design and data collection                                                                                                                                                                    |
| 5<br>6<br>7<br>8<br>9<br>10<br>11<br>12<br>13<br>14<br>15<br>16<br>17<br>18<br>19<br>20<br>21<br>22<br>23<br>24<br>25<br>26<br>27<br>28<br>29<br>30<br>31<br>32 | Participants                 | 6 | <p>(a) <i>Cohort study</i> - Give the eligibility criteria, and the sources and methods of selection of participants. Describe methods of follow-up</p> <p><i>Case-control study</i> - Give the eligibility criteria, and the sources and methods of case ascertainment and control selection. Give the rationale for the choice of cases and controls</p> <p><i>Cross-sectional study</i> - Give the eligibility criteria, and the sources and methods of selection of participants</p> <p>(b) <i>Cohort study</i> - For matched studies, give matching criteria and number of exposed and unexposed</p> <p><i>Case-control study</i> - For matched studies, give matching criteria and the number of controls per case</p> | <p>RECORD 6.1: The methods of study population selection (such as codes or algorithms used to identify subjects) should be listed in detail. If this is not possible, an explanation should be provided.</p> <p>RECORD 6.2: Any validation studies of the codes or algorithms used to select the population should be referenced. If validation was conducted for this study and not published elsewhere, detailed methods and results should be provided.</p> <p>RECORD 6.3: If the study involved linkage of databases, consider use of a flow diagram or other graphical display to demonstrate the data linkage process, including the number of individuals with linked data at each stage.</p> | <p>6.1 Methods, p. 3, supplementary file 3 for the ICPC codes and supplementary file 4 for the ACT codes</p> <p>6.2 Intego registry external validation described in Truyers et al. Reference</p> <p>6.3 NA</p> |
| 33<br>34<br>35<br>36<br>37<br>38                                                                                                                                | Variables                    | 7 | Clearly define all outcomes, exposures, predictors, potential confounders, and effect modifiers. Give diagnostic criteria, if applicable.                                                                                                                                                                                                                                                                                                                                                                                                                                                                                                                                                                                    | RECORD 7.1: A complete list of codes and algorithms used to classify exposures, outcomes, confounders, and effect modifiers should be provided. If these cannot be reported, an explanation should be provided.                                                                                                                                                                                                                                                                                                                                                                                                                                                                                      | 7.1 Methods, p. 3, design, supplementary file 1 till 4                                                                                                                                                          |
| 39<br>40<br>41<br>42<br>43<br>44                                                                                                                                | Data sources/<br>measurement | 8 | For each variable of interest, give sources of data and details of methods of assessment (measurement).                                                                                                                                                                                                                                                                                                                                                                                                                                                                                                                                                                                                                      |                                                                                                                                                                                                                                                                                                                                                                                                                                                                                                                                                                                                                                                                                                      | Page 5: Methods, design pp. 3-4, the Intego                                                                                                                                                                     |

|                                  |    |                                                                                                                                                                                                                                                                                                                                                                                                                                                                                                                                                                      |  |                                                              |                                                                        |
|----------------------------------|----|----------------------------------------------------------------------------------------------------------------------------------------------------------------------------------------------------------------------------------------------------------------------------------------------------------------------------------------------------------------------------------------------------------------------------------------------------------------------------------------------------------------------------------------------------------------------|--|--------------------------------------------------------------|------------------------------------------------------------------------|
|                                  |    | Describe comparability of assessment methods if there is more than one group                                                                                                                                                                                                                                                                                                                                                                                                                                                                                         |  |                                                              | Database is explained in detail                                        |
| Bias                             | 9  | Describe any efforts to address potential sources of bias                                                                                                                                                                                                                                                                                                                                                                                                                                                                                                            |  |                                                              | Methods, design, p.3 and Discussion, pp. 11-12, paragraph 5            |
| Study size                       | 10 | Explain how the study size was arrived at                                                                                                                                                                                                                                                                                                                                                                                                                                                                                                                            |  |                                                              | NA                                                                     |
| Quantitative variables           | 11 | Explain how quantitative variables were handled in the analyses. If applicable, describe which groupings were chosen, and why                                                                                                                                                                                                                                                                                                                                                                                                                                        |  |                                                              | Methods, data analysis p.5                                             |
| Statistical methods              | 12 | (a) Describe all statistical methods, including those used to control for confounding<br>(b) Describe any methods used to examine subgroups and interactions<br>(c) Explain how missing data were addressed<br>(d) <i>Cohort study</i> - If applicable, explain how loss to follow-up was addressed<br><i>Case-control study</i> - If applicable, explain how matching of cases and controls was addressed<br><i>Cross-sectional study</i> - If applicable, describe analytical methods taking account of sampling strategy<br>(e) Describe any sensitivity analyses |  |                                                              | (a) methods, data analysis p.5<br>(b) NA<br>(c) NA<br>(d) NA<br>(e) NA |
| Data access and cleaning methods |    | ..                                                                                                                                                                                                                                                                                                                                                                                                                                                                                                                                                                   |  | RECORD 12.1: Authors should describe the extent to which the | 12.1 Data sharing statement, p.14                                      |

|                  |    |                                                                                                                                                                                                                                                                                                                                                 |  |                                                                                                                                                                                                                                                                                                                    |                                                                            |
|------------------|----|-------------------------------------------------------------------------------------------------------------------------------------------------------------------------------------------------------------------------------------------------------------------------------------------------------------------------------------------------|--|--------------------------------------------------------------------------------------------------------------------------------------------------------------------------------------------------------------------------------------------------------------------------------------------------------------------|----------------------------------------------------------------------------|
|                  |    |                                                                                                                                                                                                                                                                                                                                                 |  | investigators had access to the database population used to create the study population.<br><br>RECORD 12.2: Authors should provide information on the data cleaning methods used in the study.                                                                                                                    | 12.2 Availability of data and materials, p.14                              |
| Linkage          |    | ..                                                                                                                                                                                                                                                                                                                                              |  | RECORD 12.3: State whether the study included person-level, institutional-level, or other data linkage across two or more databases. The methods of linkage and methods of linkage quality evaluation should be provided.                                                                                          | NA                                                                         |
| <b>Results</b>   |    |                                                                                                                                                                                                                                                                                                                                                 |  |                                                                                                                                                                                                                                                                                                                    |                                                                            |
| Participants     | 13 | (a) Report the numbers of individuals at each stage of the study ( <i>e.g.</i> , numbers potentially eligible, examined for eligibility, confirmed eligible, included in the study, completing follow-up, and analysed)<br>(b) Give reasons for non-participation at each stage.<br>(c) Consider use of a flow diagram                          |  | RECORD 13.1: Describe in detail the selection of the persons included in the study ( <i>i.e.</i> , study population selection) including filtering based on data quality, data availability and linkage. The selection of included persons can be described in the text and/or by means of the study flow diagram. | NA                                                                         |
| Descriptive data | 14 | (a) Give characteristics of study participants ( <i>e.g.</i> , demographic, clinical, social) and information on exposures and potential confounders<br>(b) Indicate the number of participants with missing data for each variable of interest<br>(c) <i>Cohort study</i> - summarise follow-up time ( <i>e.g.</i> , average and total amount) |  |                                                                                                                                                                                                                                                                                                                    | (a) Results, pp. 6-9<br>Table 1<br>Figures 1-3<br><br>(b) NA<br><br>(c) NA |

|                                                                                              |                   |    |                                                                                                                                                                                                                                                                                                                                                                                                                                |  |                                                                                                                                                                                                                   |                                                  |
|----------------------------------------------------------------------------------------------|-------------------|----|--------------------------------------------------------------------------------------------------------------------------------------------------------------------------------------------------------------------------------------------------------------------------------------------------------------------------------------------------------------------------------------------------------------------------------|--|-------------------------------------------------------------------------------------------------------------------------------------------------------------------------------------------------------------------|--------------------------------------------------|
| 1<br>2<br>3<br>4<br>5<br>6<br>7<br>8<br>9<br>10<br>11                                        | Outcome data      | 15 | <p><i>Cohort study</i> - Report numbers of outcome events or summary measures over time</p> <p><i>Case-control study</i> - Report numbers in each exposure category, or summary measures of exposure</p> <p><i>Cross-sectional study</i> - Report numbers of outcome events or summary measures</p>                                                                                                                            |  |                                                                                                                                                                                                                   | NA                                               |
| 12<br>13<br>14<br>15<br>16<br>17<br>18<br>19<br>20<br>21<br>22<br>23<br>24<br>25<br>26<br>27 | Main results      | 16 | <p>(a) Give unadjusted estimates and, if applicable, confounder-adjusted estimates and their precision (e.g., 95% confidence interval). Make clear which confounders were adjusted for and why they were included</p> <p>(b) Report category boundaries when continuous variables were categorized</p> <p>(c) If relevant, consider translating estimates of relative risk into absolute risk for a meaningful time period</p> |  |                                                                                                                                                                                                                   | (a) Results, pp. 6-9<br>Table 1-3<br>Figures 1-3 |
| 28<br>29<br>30<br>31<br>32                                                                   | Other analyses    | 17 | Report other analyses done—e.g., analyses of subgroups and interactions, and sensitivity analyses                                                                                                                                                                                                                                                                                                                              |  |                                                                                                                                                                                                                   | NA                                               |
| 33                                                                                           | <b>Discussion</b> |    |                                                                                                                                                                                                                                                                                                                                                                                                                                |  |                                                                                                                                                                                                                   |                                                  |
| 34<br>35<br>36                                                                               | Key results       | 18 | Summarise key results with reference to study objectives                                                                                                                                                                                                                                                                                                                                                                       |  |                                                                                                                                                                                                                   | Discussion, last paragraph with conclusions p.12 |
| 37<br>38<br>39<br>40<br>41<br>42<br>43<br>44                                                 | Limitations       | 19 | Discuss limitations of the study, taking into account sources of potential bias or imprecision. Discuss both direction and magnitude of any potential bias                                                                                                                                                                                                                                                                     |  | RECORD 19.1: Discuss the implications of using data that were not created or collected to answer the specific research question(s). Include discussion of misclassification bias, unmeasured confounding, missing | Discussion, paragraph 5, pp. 11-12               |

1  
2  
3  
4  
5  
6  
7  
8  
9  
10  
11  
12  
13  
14  
15  
16  
17  
18  
19  
20  
21  
22  
23  
24  
25  
26  
27  
28  
29  
30  
31  
32  
33  
34  
35  
36  
37  
38  
39  
40  
41  
42  
43  
44  
45  
46  
47

|                                                           |    |                                                                                                                                                                            |  |                                                                                                                                                          |                                          |
|-----------------------------------------------------------|----|----------------------------------------------------------------------------------------------------------------------------------------------------------------------------|--|----------------------------------------------------------------------------------------------------------------------------------------------------------|------------------------------------------|
|                                                           |    |                                                                                                                                                                            |  | data, and changing eligibility over time, as they pertain to the study being reported.                                                                   |                                          |
| Interpretation                                            | 20 | Give a cautious overall interpretation of results considering objectives, limitations, multiplicity of analyses, results from similar studies, and other relevant evidence |  |                                                                                                                                                          | Discussion, pp. 10-12                    |
| Generalisability                                          | 21 | Discuss the generalisability (external validity) of the study results                                                                                                      |  |                                                                                                                                                          | Discussion, pp. 10-12                    |
| <b>Other Information</b>                                  |    |                                                                                                                                                                            |  |                                                                                                                                                          |                                          |
| Funding                                                   | 22 | Give the source of funding and the role of the funders for the present study and, if applicable, for the original study on which the present article is based              |  |                                                                                                                                                          | Funding, p.14                            |
| Accessibility of protocol, raw data, and programming code |    | ..                                                                                                                                                                         |  | RECORD 22.1: Authors should provide information on how to access any supplemental information such as the study protocol, raw data, or programming code. | Availability of data and materials, p.14 |

\*Reference: Benchimol EI, Smeeth L, Guttman A, Harron K, Moher D, Petersen I, Sørensen HT, von Elm E, Langan SM, the RECORD Working Committee. The REporting of studies Conducted using Observational Routinely-collected health Data (RECORD) Statement. *PLoS Medicine* 2015; in press.

# BMJ Open

## The epidemiology of knee osteoarthritis in general practice: a registry-based study

|                                 |                                                                                                                                                                                                                                                                                                                                                                                                                                                                                                                                                                                                                                                                                                                                                                                                                                                                                                                                           |
|---------------------------------|-------------------------------------------------------------------------------------------------------------------------------------------------------------------------------------------------------------------------------------------------------------------------------------------------------------------------------------------------------------------------------------------------------------------------------------------------------------------------------------------------------------------------------------------------------------------------------------------------------------------------------------------------------------------------------------------------------------------------------------------------------------------------------------------------------------------------------------------------------------------------------------------------------------------------------------------|
| Journal:                        | <i>BMJ Open</i>                                                                                                                                                                                                                                                                                                                                                                                                                                                                                                                                                                                                                                                                                                                                                                                                                                                                                                                           |
| Manuscript ID                   | bmjopen-2019-031734.R2                                                                                                                                                                                                                                                                                                                                                                                                                                                                                                                                                                                                                                                                                                                                                                                                                                                                                                                    |
| Article Type:                   | Original research                                                                                                                                                                                                                                                                                                                                                                                                                                                                                                                                                                                                                                                                                                                                                                                                                                                                                                                         |
| Date Submitted by the Author:   | 22-Oct-2019                                                                                                                                                                                                                                                                                                                                                                                                                                                                                                                                                                                                                                                                                                                                                                                                                                                                                                                               |
| Complete List of Authors:       | Spitaels, David; Katholieke Universiteit Leuven, Departement of Public Health and Primary Care<br>Mamouris, Pavlos; Katholieke Universiteit Leuven Groep Biomedische Wetenschappen, Departement of Public Health and Primary Care<br>Vaes, Bert; Katholieke Universiteit Leuven Groep Biomedische Wetenschappen, Departement of Public Health and Primary Care;<br>Universite catholique de Louvain, Louvain Drug Research Institute<br>Smeets, Miek; Katholieke Universiteit Leuven Groep Biomedische Wetenschappen, Departement of Public Health and Primary Care<br>Luyten, F; Katholieke Universiteit Leuven UZ Leuven, Rheumatology<br>Hermens, Rosella; Radboudumc IQ healthcare; Katholieke Universiteit Leuven Groep Biomedische Wetenschappen, Departement of Public Health and Primary Care<br>Vankrunkelsven, Patrik; Katholieke Universiteit Leuven Groep Humane Wetenschappen, Departement of Public Health and Primary Care |
| <b>Primary Subject Heading</b>: | Epidemiology                                                                                                                                                                                                                                                                                                                                                                                                                                                                                                                                                                                                                                                                                                                                                                                                                                                                                                                              |
| Secondary Subject Heading:      | General practice / Family practice, Rheumatology                                                                                                                                                                                                                                                                                                                                                                                                                                                                                                                                                                                                                                                                                                                                                                                                                                                                                          |
| Keywords:                       | Knee < ORTHOPAEDIC & TRAUMA SURGERY, Musculoskeletal disorders < ORTHOPAEDIC & TRAUMA SURGERY, PRIMARY CARE, PUBLIC HEALTH                                                                                                                                                                                                                                                                                                                                                                                                                                                                                                                                                                                                                                                                                                                                                                                                                |
|                                 |                                                                                                                                                                                                                                                                                                                                                                                                                                                                                                                                                                                                                                                                                                                                                                                                                                                                                                                                           |

SCHOLARONE™  
Manuscripts





I, the Submitting Author has the right to grant and does grant on behalf of all authors of the Work (as defined in the below author licence), an exclusive licence and/or a non-exclusive licence for contributions from authors who are: i) UK Crown employees; ii) where BMJ has agreed a CC-BY licence shall apply, and/or iii) in accordance with the terms applicable for US Federal Government officers or employees acting as part of their official duties; on a worldwide, perpetual, irrevocable, royalty-free basis to BMJ Publishing Group Ltd ("BMJ") its licensees and where the relevant Journal is co-owned by BMJ to the co-owners of the Journal, to publish the Work in this journal and any other BMJ products and to exploit all rights, as set out in our [licence](#).

The Submitting Author accepts and understands that any supply made under these terms is made by BMJ to the Submitting Author unless you are acting as an employee on behalf of your employer or a postgraduate student of an affiliated institution which is paying any applicable article publishing charge ("APC") for Open Access articles. Where the Submitting Author wishes to make the Work available on an Open Access basis (and intends to pay the relevant APC), the terms of reuse of such Open Access shall be governed by a Creative Commons licence – details of these licences and which [Creative Commons](#) licence will apply to this Work are set out in our licence referred to above.

Other than as permitted in any relevant BMJ Author's Self Archiving Policies, I confirm this Work has not been accepted for publication elsewhere, is not being considered for publication elsewhere and does not duplicate material already published. I confirm all authors consent to publication of this Work and authorise the granting of this licence.

# The epidemiology of knee osteoarthritis in general practice: a registry-based study

## Authors

David Spitaels<sup>1</sup>; Pavlos Mamouris<sup>1</sup>; Bert Vaes<sup>1,2</sup>; Miek Smeets<sup>1</sup>; Frank Luyten<sup>3</sup>; Rosella Hermens<sup>1,4</sup>;  
Patrik Vankrunkelsven<sup>1</sup>

## Affiliations

<sup>1</sup> Academic Center for General Practice, KU Leuven, Leuven, Belgium

<sup>2</sup> Louvain Drug Research Institute, Clinical Pharmacy Research Group and Institute of Health and Society (IRSS), Université catholique de Louvain (UCL), Brussels, Belgium

<sup>3</sup> Division of Rheumatology, University Hospitals Leuven, Leuven, Belgium

<sup>4</sup> Radboud Institute for Health Sciences (RIHS), IQ Healthcare, Radboud University Medical Center

## Correspondence

D. Spitaels, MD, ORCID ID 0000-0002-7900-7533

Academic Center for General Practice, KU Leuven

Kapucijnenvoer 33, J building, 3000 Leuven, Belgium

E-mail: [david.spitaels@kuleuven.be](mailto:david.spitaels@kuleuven.be)

## Word count

3405/4000

# The epidemiology of knee osteoarthritis in general practice: a registry-based study

## Abstract

**Objectives** The present study investigated (i) trends in the prevalence and incidence of knee osteoarthritis over a 20-year period; (ii) trends in multimorbidity; and (iii) trends in drug prescriptions.

**Design** Registry-based study.

**Setting** Primary health care, Flanders, Belgium.

**Participants** Data were collected from Intego, a general practice-based morbidity registration network. In the study period between 1996 and 2015 data from 440,140 unique patients were available.

**Outcome measures** Trends in prevalence and incidence rate of knee osteoarthritis were computed using joinpoint regression analysis. The mean disease count was calculated to assess trends in multimorbidity. In addition, the number of drug prescriptions was identified by the Anatomical Therapeutic Chemical Classification code and trends were equally recorded with joinpoint regression.

**Results** The prevalence of knee osteoarthritis increased from 1.99% in 1996 to 3.56% in 2015. An upward trend was observed with an average annual percentage change (AAPC) of 2.5 (95%CI 2.2-2.9). The incidence remained stable with 3.75‰ in 2015 (AAPC=-0.5, 95%CI -1.4-0.5). The mean disease count significantly increased from 1.63 to 2.34 ( $p<0.001$ ) for incident cases with knee osteoarthritis. Finally, we observed a significantly positive trend in the overall prescription of acetaminophen (AAPC= 6.7, 95%CI 5.6-7.7), weak opioids (AAPC= 4.0, 95%CI 0.9-7.3) and glucosamine (AAPC= 8.6, 95%CI 2.4-15.1).

**Conclusions** Increased prevalence, multimorbidity, and number of drug prescriptions confirm an increased burden of knee osteoarthritis. In future, these trends can be used to prioritize initiatives for improvement in care.

## Key Words

Knee osteoarthritis; multimorbidity; general practice; trends; burden of illness

## Article Summary

### Strengths and limitations of this study

- The Intego open registry provides real-world data of 440,140 unique patients in a primary care setting, representative for the Flemish population.
- This registry, with data over a 20-year time period (1996-2015), lends itself for trend analyses.
- Estimates on the prevalence and incidence of knee osteoarthritis are scarce for primary care settings. This study defines knee osteoarthritis when it becomes a healthcare problem for the patient.
- Data completeness depends on the quality of registration of the participating general practitioners. To this end, only optimal registration practices are included in the Intego database.
- The lack of data verification and misclassification is minimised because new diagnoses are automatically linked to ICPC-2 and ICD-10 codes.

## Introduction

Osteoarthritis (OA) is the most common joint disease and is expected to become the fourth leading cause of disability worldwide by 2020.<sup>1</sup> OA mainly affects the joints of the knees, hips, hands, facets and feet, but knee OA accounts for 83% of the total OA burden.<sup>2</sup> The prevalence of knee OA varies according to the definition: from subjective (population-based) assessments to clinical and radiographic definitions, often with low levels of concordance between them.<sup>3</sup> However, estimates on the prevalence of knee OA are scarce for primary care settings.<sup>4</sup>

At present, the purposes of conservative knee OA treatment are to alleviate pain, to improve the function of the joint and to slow down joint damage by pharmacological and non-pharmacological means.<sup>5</sup> All patients should be offered the following core conservative interventions: information to enhance their understanding about OA, advice to exercise, and to achieve weight loss for people who are obese or overweight.<sup>6 7</sup> Pharmacological management is dominated both by acetaminophen and by nonsteroidal anti-inflammatory drugs (NSAIDs).<sup>5 8 9</sup> The presence of multimorbidity may also affect choices in the pharmacological management, since multimorbidity and polypharmacy are closely related.<sup>6 10 11</sup> OA has one of the highest rates of multimorbidity for patients who are managed in general practice.<sup>12 13</sup> Common multimorbidities in patients with knee OA are cardiovascular diseases, diabetes mellitus, chronic obstructive pulmonary disease, and obesity.<sup>14</sup> Nevertheless, multimorbidity-adapted management protocols are being developed and provide tailored guidance for pharmacological management and exercise therapy.<sup>5 7</sup> Numerous reports indicate that the number of people suffering from chronic diseases, multimorbidity and polypharmacy continues to increase, but those studies are mainly based on cross-sectional studies in different populations.<sup>15</sup> Time trends in the prevalence of multimorbidity and polypharmacy are scarce.<sup>16 17</sup> The Flemish primary care-based Intego database offers the opportunity to extract “real world” data and evaluate time trends.

1  
2  
3 The aims of the present study were 1) to evaluate time trends in the prevalence and incidence of patients  
4 with knee OA managed in general practice; 2) to assess trends in multimorbidity and 3) to assess trends  
5 in drug prescriptions over a 20-year period.  
6  
7

## 8 9 Methods

### 10 11 Data source

12  
13 This trend analysis study was performed using Intego, a general practice-based morbidity registration  
14 network in Flanders, Belgium.<sup>18</sup> The Intego database comprises data extracted from electronic health  
15 records (EHR) of general practitioners (GPs), all using the medical software programme Medidoc  
16 (Corilus NV, Aalter, Belgium).<sup>19</sup> Systematic collection of data started in 1994. In 2015, 111 GPs of 48  
17 practices evenly spread throughout Flanders, collaborated in the Intego project. GPs applied for  
18 inclusion in the registry. Before acceptance of their data, registration performance was audited using a  
19 number of algorithms that compared their results with those of all other applicants. Only the data of the  
20 practices with an optimal registration performance were included in the database. The design, selection  
21 process, quality control procedures and comparability with other (inter)national registration networks  
22 were described in detail previously.<sup>18</sup> The Intego GPs prospectively and routinely registered all new  
23 diagnoses together with new drug prescriptions, as well as laboratory test results, some background  
24 information (including gender and year of birth) and some biomedical parameters (i.e. blood pressure,  
25 height, weight, smoking status and mortality), using computer-generated keywords internally linked to  
26 codes. With specially framed extraction software, new data were encrypted and collected from the GPs'  
27 personal computers and entered into a central database. Registered data were continuously updated and  
28 historically accumulated for each patient. New diagnoses were classified according to a very detailed  
29 thesaurus and automatically linked to the International Classification of Primary Care (ICPC-2) and  
30 International Statistical Classification of Diseases and Related Health Problems 10th Revision (ICD-  
31 10).<sup>20</sup> Drugs were classified according to the WHO's Anatomical Therapeutic Chemical (ATC)  
32 classification system.<sup>21</sup>  
33  
34  
35  
36  
37  
38  
39  
40  
41  
42  
43  
44

### 45 46 Study population

47 For the present study, data over a 20-year time interval from 1 January 1996 to 31 December 2015 were  
48 used. In this period, 440,140 unique patients were registered in the Intego database. The yearly contact  
49 group (=YCG) is defined as the number of different patients who consulted their GP in a given year.<sup>22</sup>  
50 During the study period, the YCG varied between 81,763 and 151,971 people (see supplementary file 1  
51 for the exact number per year). Throughout the study period, 79 GP practices provided their data, with  
52 72% contributing for 15 or more years (see supplementary file 2). This study was reported in accordance  
53 with the RECORD checklist specific to observational studies using routinely collected health data.<sup>23</sup>  
54  
55  
56  
57  
58  
59  
60

## Measures

### Data on prevalence and incidence

Patients with knee OA were identified based on an ICPC-2 coded diagnosis in their EHR. The prevalence of a population is the proportion of the population with the disease at a specified time. Unlike incidence rates, which focus on new events, prevalence focuses on existing states. Because of the design of Intego (no episode registration and no recording of cure), prevalence rates could only be calculated on incurable chronic diseases, such as knee OA.<sup>18</sup> The incidence in Intego is calculated as the number of new cases of disease divided by the person-time magnitude. Calculating disease prevalence and incidence requires both a numerator (number of events or persons with a disease) and a matching denominator (the ‘population at risk’ being studied). Determining primary care practice denominators is challenging.<sup>24</sup> In this study, the YCG was used as denominator for all time trend analyses.<sup>22</sup>

### Data on multimorbidity

Patients’ medical history before they presented with knee OA was registered for all cases between 1996 and 2015. There are several instruments available to calculate multimorbidity, for example, the Carlson Index, the Cumulative Illness Rating Scale, the Index of Coexistent Diseases and the Kaplan Index.<sup>25-28</sup> For this study, the disease count was calculated for all incident cases with knee OA. For this disease count, a list of chronic diseases based on the paper by Knottnerus et al was used.<sup>29</sup> For the presence of chronic kidney disease (CKD), the glomerular filtration rate (GFR) was based on the closest creatinine measurement in the two years before or after presentation with knee OA diagnosis (Supplementary file 3: ICPC codes for diagnosis and multimorbidity).

### Data on drug prescriptions

The prescription of medication for knee OA, including acetaminophen, oral and topical anti-inflammatory drugs, cox-2 selective anti-inflammatory drugs, weak and strong opioids, parenteral glucocorticoids, parenteral hyaluronic acid and glucosamine was extracted from Intego for all prevalent cases with knee OA (Supplementary file 4: used ACT codes). Prescription of medication was considered positive if it was prescribed at least once a year.

### Statistical analysis

Descriptive statistics, with frequency distribution and percentages, were used to measure the prevalence (/100 patients) and incidence (/1000 patient years at risk) of patients with knee OA. Data were stratified by gender and ten-year age cohorts, starting from 25 with 85 years and older as the last cohort. The rates were age-standardized by taking the Flemish population of the year 1996 as reference population.<sup>30</sup> Additionally, possible time trends were analysed in the age-standardized cohorts with joinpoint regression analysis.<sup>31</sup> Joinpoint analysis identifies the best-fitting point, where a statistically significant change (called the “joinpoint”) occurs, and determines the trends between joinpoints. Joinpoint regression allows us to identify the time point(s) of follow-up at which trends significantly change.<sup>32</sup> A

1  
2  
3 minimum number of three observations from a joinpoint to either end of the data, and a minimum  
4 number of four observations between two joinpoints were required.<sup>33</sup> The annual percentage change  
5 (APC) is proposed to summarize and compare the rates of changes between successive change points.<sup>34</sup>  
6 In the final model, the joinpoint analysis also provides an average annual percentage change (AAPC) as  
7 an average of APC estimates.<sup>34</sup> This means that trends over a specific period were described by the  
8 annual percent change (APC), while trends over the whole 1996–2015 period were summarised using  
9 the average annual percent change (AAPC). Analysis was performed with the Joinpoint Regression  
10 Program (version 3.5.3, released in May 2013 and available at <http://surveillance.cancer.gov/joinpoint>).  
11 This program starts with the minimum number of joinpoint (e.g. zero joinpoints, which is a straight line)  
12 and tests whether more joinpoints are statistically significant and must be added to the model. This  
13 enables the user to test that an apparent change in trend is statistically significant.

14  
15  
16 Trends in the multimorbidity profile for incident cases with knee OA were explored over four time  
17 intervals of five years (1996-2000, 2001-2005, 2006-2010 and 2011-2015) by the Cochran-Armitage  
18 test and the Jonckheere-Terpstra test. The Cochran-Armitage test for trend analysis is a modified  
19 Pearson's chi-square test to assess the association between binary and ordinal categories (e.g. between  
20 multimorbidities and time intervals). The Jonckheere-Terpstra trend test was used to analyse trends for  
21 continuous variables (e.g. between age and time intervals).<sup>35</sup>

22  
23  
24 Over the same 20-year time period, trends in drug prescriptions for prevalent cases with knee OA were  
25 analyzed using joinpoint regression analysis, as described above. Two-sided p-values less than 0.05  
26 were considered to indicate statistical significance. Analyses were performed using R Software Version  
27 3.3.2 (Free Software Foundation Inc., Boston, MA, USA).

### 28 Patient involvement

29 No patients were involved in defining the research question or the outcome measures, nor were they  
30 involved in the design and implementation of the study. There are no plans to involve patients in the  
31 dissemination of the results.

## 32 Results

### 33 Demographic characteristics and trends in the prevalence and incidence of patients with 34 knee osteoarthritis (1996-2015)

35  
36  
37  
38  
39  
40  
41  
42  
43  
44  
45  
46  
47  
48  
49  
50  
51  
52  
53  
54  
55  
56  
57  
58  
59  
60  
Between 1 January 1996 and 31 December 2015, the Intego database included data on 440,140 unique  
patients. Table 1 shows the demographic characteristics of the patients with knee OA by gender and age  
cohorts in Table 1. The age-standardized prevalence of knee OA increased by 79% from 1.99% in 1996  
to 3.56% in 2015 (AAPC= 2.5, 95%CI 2.2-2.9, Figure 1 and supplementary file 5). Women have a  
higher prevalence than men do, but over the 20 years of the study men have a higher relative increase  
in prevalence (AAPC= 3.1, 95%CI 2.7-3.5 for men versus AAPC= 2.4, 95%CI 2.0-2.7 for women).

Figure 2 presents the observed and modeled long-term time trends in prevalence by gender. The age-standardized incidence of patients with knee OA remained stable with 4.23‰ in 1996 and 3.75‰ in 2015 (AAPC=-0.5, 95%CI -1.4-0.5), but showed a positive trend between 2006 and 2015 from 3.05‰ to 3.75‰, respectively (APC= 1.9, 95%CI 0.4-3.5) (Figure 3). Between 2006 and 2015, this positive trend was higher for men (APC= 2.5, 95%CI 0.5-4.5) than for women (APC= 1.9, 95%CI 0.4-3.5) (Figure 3).

### Trends in multimorbidity in newly diagnosed patients with knee osteoarthritis (1996-2015)

In the 20-year study period, the mean age at diagnosis of knee OA remained stable ( $p=0.384$ ) with 55.3 years in 1996 and 56.9 years in 2015, respectively, while a non-significant decline was found in the proportion of women in this period (65% to 62%,  $p=0.052$ ). Additionally, the disease burden was defined by calculating the mean disease count of patients with knee OA.<sup>29</sup> This mean disease count showed a significant increase in the study period ranging from 1.6 to 2.3 ( $p<0.001$ ), meaning that the multimorbidity of patients with knee OA increased. In this study, the following other diseases increased significantly: the proportions of patients with diabetes (6% to 15%,  $p<0.001$ ), cardiovascular events (21% to 27%,  $p<0.001$ ), depression (9% to 13%,  $p=0.009$ ) and obesity (5% to 8%,  $p<0.001$ ). Hypertension, gastro-intestinal ulcer and renal failure remained stable. Additionally, we noted that the proportion of knee OA patients with cancer (2% to 3%,  $p<0.001$ ), asthma (8% to 17%,  $p<0.001$ ) and substance abuse (0% to 2%,  $p<0.001$ ) increased significantly during the study period, while the proportion with osteoporosis remained stable (Table 2).

### Trends in prescriptions for patients with knee osteoarthritis (1996-2015)

The prescription of acetaminophen (AAPC= 6.7, 95%CI 5.6-7.7), weak opioids (AAPC= 4.0, 95%CI 0.9-7.3) and glucosamine (AAPC= 8.6, 95%CI 2.4-15.1) for patients with knee OA increased during the study period (Table 3). The prevalence of patients with knee OA who were prescribed acetaminophen was lower than those with oral NSAIDs (19.2% versus 29.4% in 2015; 5.3% versus 28.4% in 1996). The prescription of oral, topical and cox-2 selective NSAIDs remained stable for both genders during the study period. The use of strong opioids showed a strong increase between 1996 and 2003 (AAPC= 9.0, 95%CI 2.5-16), but then decreased slightly in the period from 2003 to 2015 (AAPC= -2.0, 95%CI 3.7 to -0.3).

## Discussion

This study presents estimates of knee OA prevalence and incidence based on a large morbidity registration network for general practice in Belgium. During the 20-year study period, the age-standardized prevalence of knee OA significantly increased while the age-standardized incidence rate remained stable. During the study period, patients with knee OA experienced higher multimorbidity, as



1  
2  
3 shown by almost a doubling of the disease count. Oral NSAIDs were most frequently prescribed for the  
4 prevalent patients with knee OA, while prescription of acetaminophen, weak opioids and glucosamine  
5 showed an overall positive trend.  
6  
7

8 This study shows that the prevalence rate of knee OA significantly increased even after standardization  
9 of the study population. General practice morbidity registration networks in other European countries  
10 show similar rates for knee OA: in the Netherlands, an overall prevalence of 3.4% and incidence of  
11 3.2‰ was registered in 2016.<sup>36</sup> In our study, we found similar rates with 3.56% and 3.75‰ respectively  
12 for the year 2015. In the UK, the estimated proportion of people who sought treatment for knee OA is  
13 high: 18% of the population aged 45 and over consulted their GP for knee OA.<sup>37</sup> In our study, we found  
14 a consultation prevalence of 21% for the same reference year (2010) and age cohorts. The latter study  
15 also found that OA is the most common musculoskeletal condition in older people and that just over  
16 half of all patients consulting their GP about OA have knee OA. In the near future, the number of people  
17 with knee OA is expected to rise considerably because of an aging population and obesity trends.<sup>38</sup>  
18 Nevertheless, the increasing prevalence of knee OA in general practice registration could also be  
19 attributed to other factors, for example: better access to general practice, more awareness of the public  
20 of preventive medicine, better diagnostics, better registration and higher demands and expectations of  
21 older people to remain physically active. Future qualitative research with different stakeholders could  
22 assess these possible explanations.  
23  
24

25 Osteoarthritis is one of the diseases with the highest rate of multimorbidity, with reported rates of 68%  
26 to 85%.<sup>39 40</sup> Coexisting disorders may worsen pain and bring additional impairments, which necessitate  
27 adaptations to the conservative management of knee OA.<sup>14 41</sup> In our study, knee OA was also strongly  
28 associated with the following multimorbidities: asthma, cancer, depression and substance abuse. The  
29 substantial contribution of OA to multimorbidity and frailty should be recognized, further investigated,  
30 and needs extra attention in general practice management of long-term conditions.  
31  
32

33 Pharmacological management of knee OA in general practice is dominated both by acetaminophen and  
34 by NSAIDs, as they are both recommended in evidence-based guidelines.<sup>5 7-9</sup> In Intego we look at the  
35 GP's prescription and not the actual drug use by the patient. Although the review by Machado et al.  
36 suggested that acetaminophen has little clinical benefit in OA, guidelines recommend starting with  
37 acetaminophen, because the adverse side effect profile of NSAIDs.<sup>42</sup> In our study, NSAIDs were the  
38 most frequently prescribed pain drug for prevalent patients with knee OA. Verkleij et al. observed the  
39 effects of medication on 104 patients with knee OA in general practice. They demonstrated no  
40 significant difference regarding knee pain and knee function between patients taking diclofenac or  
41 acetaminophen.<sup>43</sup> Furthermore, the discrepancy between drug prescription by the professional and drug  
42 use by the patient can be accumulated by the over the counter availability of acetaminophen and some  
43 oral NSAID in Belgium. Over the counter availability, could be considered as part of self-care to reduce  
44  
45  
46  
47  
48  
49  
50  
51  
52  
53  
54  
55  
56  
57  
58  
59  
60

1  
2  
3 the burden on health care systems and increase people's choice to take informed treatment decisions,  
4 but the medical outcome resulting from therapeutic options bypassing the physician prescription stays a  
5 major issue.<sup>44</sup> If acetaminophen should remain the 'first-line' pharmacological treatment for patients  
6 with a new episode, the effects of acetaminophen and the role in patients with multimorbidity should be  
7 further investigated.<sup>45</sup>  
8  
9  
10

## 11 12 Strengths and limitations

13 The major strengths of this study are the long-term follow-up data of a practice-based morbidity  
14 registration network in general practice. Intego covers more than 2% of the Flemish population,  
15 representative in terms of age and gender.<sup>18</sup> Deckers et al. updated an inventory of primary care  
16 surveillance networks in Europa and formulated minimal standard criteria for these networks.<sup>46</sup> When  
17 fulfilling identical minimal criteria networks can provide comparable estimates of morbidity, ultimately  
18 leading to improved national and European surveillance. For continuous surveillance networks, they  
19 advise that a sufficient sample size is approximately 1% of the population, which will allow the study  
20 of common diseases.<sup>46</sup> Longitudinal data in registry-based studies are used to track the natural history  
21 of diseases over time and enable us to perform time-to-event analyses. In addition, general practices  
22 have to pass three quality criteria before being accepted as participants in Intego, what results in a  
23 reliable morbidity database.<sup>18</sup> Important attributes of most patient registries are their large sample size  
24 and data variability.<sup>47</sup> A few limitations must also be considered. Lack of data verification is a common  
25 problem in registry-based studies with longitudinal data of large sample size. In Intego, the lack of data  
26 verification and misclassification is minimalised because new diagnoses are automatically linked to  
27 ICPC-2 and ICD-10 codes with a detailed thesaurus, individual patients are followed over time and their  
28 history is taken into account. The change for misclassification for knee OA was higher in younger age  
29 cohorts. If diagnoses are not mutually exclusive, then they count for one. Secondly, we are aware that  
30 accurate coding is always a risk for possible underdiagnosis. The difference between early-onset knee  
31 OA and chronic, established knee OA can not be established with the ICPC codes. Standardized coding  
32 for OA should be adopted in general practice to accurately describe the extent of the condition and to  
33 maximize the conservative management options to improve quality of life. Furthermore, there is no  
34 obligation for patients to be registered with a particular GP in Belgium. Therefore, it can be difficult to  
35 define 'the population at risk' for epidemiological studies in general practice. In Intego, the YCG was  
36 used as denominator for all trend analyses. Importantly, mortality data are lacking in Intego. Therefore,  
37 patients in the incidence analysis are considered at risk until the diagnosis or until December 31 of any  
38 specific year to compensate for possible overestimation in this registry-based study. Finally, obesity and  
39 smoking status could not be reliably assessed from the Intego database, because of insufficient  
40 registration in the patient files. To date, the information on socioeconomic status on patient level in the  
41 Intego register can not yet be extracted for data-analysis.. This information is available on practice level  
42 and based on the postal code. However, since GP practices in Flanders often take care of patients living  
43  
44  
45  
46  
47  
48  
49  
50  
51  
52  
53  
54  
55  
56  
57  
58  
59  
60

1  
2  
3 in neighboring municipalities and people living within a specific postal code can have a different  
4 socioeconomic status, we in general do not use this information in our analyses. Quality improvement  
5 initiatives should make GPs more aware of the necessity of properly recording up-to-date patient  
6 variables, such as BMI, in the EHR because of their growing importance in patient-tailored management  
7 strategies. Patient portals and remote access to their own medical health record are future initiatives,  
8 where the patient could play a more central role to help the GP in keeping these parameters more up-to-  
9 date by shared responsibility.<sup>48</sup>  
10  
11  
12  
13  
14

## 15 Conclusion and recommendations

16 In conclusion, increased prevalence, multimorbidity, and number of drug prescriptions, together with  
17 the young age at incidence, confirm the high burden of knee OA. Our registry-based study represents  
18 knee OA diagnoses at a time it becomes a health issue for patients. Professionals face more difficulties  
19 in their conservative management options due to rising multimorbidity. In future, these health trends  
20 can be used to prioritize initiatives for improvement in care.  
21  
22  
23  
24  
25

## 26 Acknowledgements

27 The authors would like to thank all the participating general practitioners.  
28  
29

## 30 References

- 31 1. Murray CJ, Vos T, Lozano R, et al. Disability-adjusted life years (DALYs) for 291 diseases and injuries  
32 in 21 regions, 1990-2010: a systematic analysis for the Global Burden of Disease Study 2010.  
33 *Lancet* 2012;380(9859):2197-223. doi: 10.1016/S0140-6736(12)61689-4
- 34 2. Vos T, Flaxman AD, Naghavi M, et al. Years lived with disability (YLDs) for 1160 sequelae of 289  
35 diseases and injuries 1990-2010: a systematic analysis for the Global Burden of Disease Study  
36 2010. *Lancet* 2012;380(9859):2163-96. doi: 10.1016/S0140-6736(12)61729-2
- 37 3. Litwic A, Edwards MH, Dennison EM, et al. Epidemiology and burden of osteoarthritis. *Br Med Bull*  
38 2013;105:185-99. doi: 10.1093/bmb/lds038
- 39 4. Bedson J, Jordan K, Croft P. The prevalence and history of knee osteoarthritis in general practice: a  
40 case-control study. *Fam Pract* 2005;22(1):103-8. doi: 10.1093/fampra/cmh700 [published  
41 Online First: 2005/01/11]
- 42 5. McAlindon TE, Bannuru RR, Sullivan MC, et al. OARSI guidelines for the non-surgical management of  
43 knee osteoarthritis. *Osteoarthritis Cartilage* 2014;22(3):363-88. doi:  
44 10.1016/j.joca.2014.01.003 [published Online First: 2014/01/28]
- 45 6. National Institute for Health and Care Excellence (NICE): Osteoarthritis: care and management  
46 (quality standard 87): <http://guidance.nice.org.uk/qs87>. Accessed October 22, 2019.
- 47 7. Fernandes L, Hagen KB, Bijlsma JW, et al. EULAR recommendations for the non-pharmacological core  
48 management of hip and knee osteoarthritis. *Ann Rheum Dis* 2013;72(7):1125-35. doi:  
49 10.1136/annrheumdis-2012-202745 [published Online First: 2013/04/19]
- 50 8. Hochberg MC, Altman RD, April KT, et al. American College of Rheumatology 2012 recommendations  
51 for the use of nonpharmacologic and pharmacologic therapies in osteoarthritis of the hand,  
52 hip, and knee. *Arthritis Care Res (Hoboken)* 2012;64(4):465-74. [published Online First:  
53 2012/05/09]
- 54 9. Kingsbury SR, Gross HJ, Isherwood G, et al. Osteoarthritis in Europe: impact on health status, work  
55 productivity and use of pharmacotherapies in five European countries. *Rheumatology (Oxford)*  
56 2014;53(5):937-47. doi: 10.1093/rheumatology/ket463 [published Online First: 2014/02/04]  
57  
58  
59  
60

10. Harding PA, Holland AE, Hinman RS, et al. Physical activity perceptions and beliefs following total hip and knee arthroplasty: a qualitative study. *Physiother Theory Pract* 2015;31(2):107-13. doi: 10.3109/09593985.2014.959581 [published Online First: 2014/12/17]
11. de Rooij M, Steultjens MPM, Avezaat E, et al. Restrictions and contraindications for exercise therapy in patients with hip and knee osteoarthritis and comorbidity. *Physical Therapy Reviews* 2013;18(2):101-11. doi: 10.1179/1743288X12Y.0000000056
12. Kadam UT, Jordan K, Croft PR. Clinical comorbidity in patients with osteoarthritis: a case-control study of general practice consultants in England and Wales. *Ann Rheum Dis* 2004;63(4):408-14. doi: 10.1136/ard.2003.007526 [published Online First: 2004/03/17]
13. van Oostrom SH, Picavet HS, de Bruin SR, et al. Multimorbidity of chronic diseases and health care utilization in general practice. *BMC Fam Pract* 2014;15:61. doi: 10.1186/1471-2296-15-61 [published Online First: 2014/04/09]
14. Reeuwijk KG, de Rooij M, van Dijk GM, et al. Osteoarthritis of the hip or knee: which coexisting disorders are disabling? *Clin Rheumatol* 2010;29(7):739-47. doi: 10.1007/s10067-010-1392-8 [published Online First: 2010/02/24]
15. Freid VM, Bernstein AB, Bush MA. Multiple chronic conditions among adults aged 45 and over: trends over the past 10 years. *NCHS Data Brief* 2012(100):1-8. [published Online First: 2012/10/30]
16. van den Akker M, Vaes B, Goderis G, et al. Trends in multimorbidity and polypharmacy in the Flemish-Belgian population between 2000 and 2015. *PLoS One* 2019;14(2):e0212046. doi: 10.1371/journal.pone.0212046 [published Online First: 2019/02/13]
17. Uijen AA, van de Lisdonk EH. Multimorbidity in primary care: prevalence and trend over the last 20 years. *Eur J Gen Pract* 2008;14 Suppl 1:28-32. doi: 10.1080/13814780802436093 [published Online First: 2008/10/31]
18. Truyers C, Goderis G, Dewitte H, et al. The Intego database: background, methods and basic results of a Flemish general practice-based continuous morbidity registration project. *BMC Med Inform Decis Mak* 2014;14:48. doi: 10.1186/1472-6947-14-48 [published Online First: 2014/06/08]
19. Vanbeselaere V, Truyers C, Elli S, et al. Association between atrial fibrillation, anticoagulation, risk of cerebrovascular events and multimorbidity in general practice: a registry-based study. *BMC Cardiovasc Disord* 2016;16:61. doi: 10.1186/s12872-016-0235-1 [published Online First: 2016/03/30]
20. Okkes IM, Becker HW, Bernstein RM, et al. The March 2002 update of the electronic version of ICPC-2. A step forward to the use of ICD-10 as a nomenclature and a terminology for ICPC-2. *Fam Pract* 2002;19(5):543-6. [published Online First: 2002/10/03]
21. WHO Collaborating Centre for Drug Statistics Methodology: ATC/DDD Index 2010. Available at [http://www.whocc.no/atc\\_ddd\\_index](http://www.whocc.no/atc_ddd_index). Accessed October 19, 2019.
22. Bartholomeeusen S, Kim CY, Mertens R, et al. The denominator in general practice, a new approach from the Intego database. *Fam Pract* 2005;22(4):442-7. doi: 10.1093/fampra/cmi054 [published Online First: 2005/06/21]
23. Benchimol EI, Smeeth L, Guttman A, et al. The REporting of studies Conducted using Observational Routinely-collected health Data (RECORD) statement. *PLoS Med* 2015;12(10):e1001885. doi: 10.1371/journal.pmed.1001885 [published Online First: 2015/10/07]
24. Greiver M, Williamson T, Bennett TL, et al. Developing a method to estimate practice denominators for a national Canadian electronic medical record database. *Fam Pract* 2013;30(3):347-54. doi: 10.1093/fampra/cms083 [published Online First: 2013/01/12]
25. Charlson ME, Pompei P, Ales KL, et al. A new method of classifying prognostic comorbidity in longitudinal studies: development and validation. *J Chronic Dis* 1987;40(5):373-83. [published Online First: 1987/01/01]
26. Shah AN, Vail TP, Taylor D, et al. Comorbid illness affects hospital costs related to hip arthroplasty: quantification of health status and implications for fair reimbursement and surgeon comparisons. *J Arthroplasty* 2004;19(6):700-5. [published Online First: 2004/09/03]

- 1
  - 2
  - 3
  - 4
  - 5
  - 6
  - 7
  - 8
  - 9
  - 10
  - 11
  - 12
  - 13
  - 14
  - 15
  - 16
  - 17
  - 18
  - 19
  - 20
  - 21
  - 22
  - 23
  - 24
  - 25
  - 26
  - 27
  - 28
  - 29
  - 30
  - 31
  - 32
  - 33
  - 34
  - 35
  - 36
  - 37
  - 38
  - 39
  - 40
  - 41
  - 42
  - 43
  - 44
  - 45
  - 46
  - 47
  - 48
  - 49
  - 50
  - 51
  - 52
  - 53
  - 54
  - 55
  - 56
  - 57
  - 58
  - 59
  - 60
27. Linn BS, Linn MW, Gurel L. Cumulative illness rating scale. *J Am Geriatr Soc* 1968;16(5):622-6. doi: 10.1111/j.1532-5415.1968.tb02103.x [published Online First: 1968/05/01]
28. Piccirillo JF, Lacy PD, Basu A, et al. Development of a new head and neck cancer-specific comorbidity index. *Arch Otolaryngol Head Neck Surg* 2002;128(10):1172-9. doi: 10.1001/archotol.128.10.1172 [published Online First: 2002/10/09]
29. Knottnerus JA, Metsemakers J, Hoppener P, et al. Chronic illness in the community and the concept of 'social prevalence'. *Fam Pract* 1992;9(1):15-21. [published Online First: 1992/03/01]
30. Tuyens C, Elli S, Goderis G, et al. [Dutch: 20 year General Practice in Flanders (1994-2013)]. Leuven: Acco, 2015. ISBN978-94-6292-129-0.
31. Kim HJ, Fay MP, Feuer EJ, et al. Permutation tests for joinpoint regression with applications to cancer rates. *Stat Med* 2000;19(3):335-51. [published Online First: 2000/01/29]
32. Rea F, Pagan E, Compagnoni M, et al. Joinpoint regression analysis with time-on-study as time-scale. Application to three Italian population-based cohort studies. *Epidemiology Biostatistics and Public Health* 2017;14(3):e12616:1-8.
33. Yu B, Barrett MJ, Kim H-J, et al. Estimating joinpoints in continuous time scale for multiple change-point models. *Computational Statistics & Data Analysis* 2007;51(5):2420-27. doi: <https://doi.org/10.1016/j.csda.2006.07.044>
34. Clegg LX, Hankey BF, Tiwari R, et al. Estimating average annual per cent change in trend analysis. *Stat Med* 2009;28(29):3670-82. doi: 10.1002/sim.3733 [published Online First: 2009/10/27]
35. Alan A. Categorical data analysis. 2nd ed: Wiley 2002.
36. Nivel database for primary care morbidity registration in the Netherlands. Available at <https://www.nivel.nl/nl/>. Accessed October 19, 2019.
37. Osteoarthritis in general practice: data and perspectives. 2013. Available at [www.arthritisresearchuk.org](http://www.arthritisresearchuk.org). Accessed October 19, 2019.
38. Cross M, Smith E, Hoy D, et al. The global burden of hip and knee osteoarthritis: estimates from the global burden of disease 2010 study. *Ann Rheum Dis* 2014;73(7):1323-30. doi: 10.1136/annrheumdis-2013-204763 [published Online First: 2014/02/21]
39. de Rooij M, van der Leeden M, Cheung J, et al. Efficacy of Tailored Exercise Therapy on Physical Functioning in Patients With Knee Osteoarthritis and Comorbidity: A Randomized Controlled Trial. *Arthritis Care Res (Hoboken)* 2017;69(6):807-16. doi: 10.1002/acr.23013 [published Online First: 2016/08/27]
40. van Dijk GM, Veenhof C, Schellevis F, et al. Comorbidity, limitations in activities and pain in patients with osteoarthritis of the hip or knee. *BMC Musculoskelet Disord* 2008;9:95. doi: 10.1186/1471-2474-9-95 [published Online First: 2008/06/28]
41. Calders P, Van Ginckel A. Presence of comorbidities and prognosis of clinical symptoms in knee and/or hip osteoarthritis: A systematic review and meta-analysis. *Semin Arthritis Rheum* 2018;47(6):805-13. doi: 10.1016/j.semarthrit.2017.10.016 [published Online First: 2017/11/22]
42. Machado GC, Maher CG, Ferreira PH, et al. Efficacy and safety of paracetamol for spinal pain and osteoarthritis: systematic review and meta-analysis of randomised placebo controlled trials. *Bmj* 2015;350:h1225. doi: 10.1136/bmj.h1225 [published Online First: 2015/04/02]
43. Verkleij SP, Luijsterburg PA, Willemsen SP, et al. Effectiveness of diclofenac versus paracetamol in knee osteoarthritis: a randomised controlled trial in primary care. *Br J Gen Pract* 2015;65(637):e530-7. doi: 10.3399/bjgp15X686101 [published Online First: 2015/07/28]
44. WHO Guidelines for the Regulatory Assessment of Medicinal Products for Use in Self-medication. WHO/EDM/QSM/00.1. 2000. Available at: <https://apps.who.int/medicinedocs>. Accessed September 11, 2019.
45. Conaghan PG. NSAIDs or paracetamol for short-term treatment of mild to moderate knee pain in early osteoarthritis: are they equivalent? *Evid Based Med* 2016;21(1):14. doi: 10.1136/ebmed-2015-110289 [published Online First: 2015/10/21]

- 1  
2  
3 46. Deckers JG, Paget WJ, Schellevis FG, et al. European primary care surveillance networks: their  
4 structure and operation. *Fam Pract* 2006;23(2):151-8. doi: 10.1093/fampra/cmi118 [published  
5 Online First: 2006/02/09]  
6  
7 47. Trotter JP. Patient registries: a new gold standard for "real world" research. *Ochsner J*  
8 2002;4(4):211-4. [published Online First: 2002/10/01]  
9  
10 48. Alpert JM, Krist AH, Aycock RA, et al. Designing User-Centric Patient Portals: Clinician and Patients'  
11 Uses and Gratifications. *Telemed J E Health* 2017;23(3):248-53. doi: 10.1089/tmj.2016.0096  
12 [published Online First: 2016/06/23]

## 13 Footnotes

14  
15 **Contributors:** PM and DS performed the analyses, and DS, PV, RH, MS, FL, BV wrote the manuscript.  
16 DS, MS and BV are responsible for the study concept, design, the recruitment of subjects and acquisition  
17 of data. All authors participated in the interpretation of the data. All authors approved the final version  
18 of the manuscript.  
19

20  
21  
22 **Funding:** the Flemish Government (Ministry of Health and Welfare) funds Intego on a regular basis.  
23 This work would not have been possible without the collaboration of all general practitioners of the  
24 Intego network. We hereby state the independence of the researchers from the funders.  
25

26  
27  
28 **Disclaimer:** The funders had no role in the study design, data collection and analysis, decision to publish  
29 or preparation of the manuscript  
30

31  
32 **Competing interests:** None declared.

33  
34 **Ethics approval:** The Intego project was presented to the Belgian Privacy Commission (no  
35 SCSZG/13/079) and approved by the ethical review board of the Medical School of the Catholic  
36 University of Leuven (N° ML 1723). This permission completely covered the current investigation. In  
37 the Intego protocol, participating GP practices have to inform their patients that the practice participates  
38 in a morbidity registration network. Patients can choose to opt out for the possibility of their anonymized  
39 data extraction.  
40  
41  
42

43  
44 **Data sharing statement:** The dataset supporting the conclusions of this article is held at the University  
45 of Leuven, Belgium, and can be shared upon contacting the corresponding author.  
46  
47  
48  
49  
50  
51  
52  
53  
54  
55  
56  
57  
58  
59  
60

## Figure legends

1. Figure 1. The standardized and non-standardized prevalence of patients with knee osteoarthritis by age cohorts in the Intego registry (1996-2015). Standardization was performed by taking the Flemish population of the year 1996 as reference population.
2. Figure 2. An overview of the observed and modeled trends in prevalence for men and women in the Intego registry (1996-2015). Observed (bullets) and modeled (trend line) age-standardized average annual percentage change (AAPC) in prevalence with 95% confidence intervals for time trends for patients with knee osteoarthritis in Intego register, 1996–2015. The AAPC is significantly different from zero at  $\alpha = 0.05$ .
3. Figure 3. The standardized and non-standardized incidence of patients with knee osteoarthritis in the Intego registry (1996-2015). Standardization was performed by taking the Flemish population of the year 1996 as reference population.

## Supplementary file list

1. Supplementary file 1. Number of people in the yearly contact group (by gender and age cohort) in Intego (1996-2015).
2. Supplementary file 2. Participation of GP practices in Intego (1996-2015).
3. Supplementary file 3. ICPC codes and description of codes for the disease count.
4. Supplementary file 4. ACT coding for pharmacological agents used in the management of knee osteoarthritis.
5. Supplementary file 5. Demographic characteristics of patients with knee osteoarthritis in Intego (1996, 2005 and 2015).
6. The Record checklist.



Table 1. Demographic characteristics and trends in prevalence and incidence of patients with knee osteoarthritis in the Intego registry (1996-2015).

|                                  | Year<br>1996* | Year<br>2015* | Overall<br>trend***       | Trend 1       |                             | Trend 2       |                           | Trend<br>3    |                             |
|----------------------------------|---------------|---------------|---------------------------|---------------|-----------------------------|---------------|---------------------------|---------------|-----------------------------|
|                                  | %             | %             | AAPC<br>[95% CI]          | Years         | APC<br>[95% CI]             | Years         | APC<br>[95% CI]           | Years         | APC<br>[95% CI]             |
| <b>Prevalence</b>                |               |               |                           |               |                             |               |                           |               |                             |
| <b>Total</b>                     | 1.99          | 3.56          | <b>2.5</b><br>[2.2;2.9]   | 1996-<br>2015 | <b>2.5</b><br>[2.2;2.9]     |               |                           |               |                             |
| <b>Men</b>                       | 1.32          | 2.59          | <b>3.1</b><br>[2.7;3.5]   | 1996-<br>2015 | <b>3.1</b><br>[2.7;3.5]     |               |                           |               |                             |
| <b>Women</b>                     | 2.64          | 4.55          | <b>2.4</b><br>[2.0;2.7]   | 1996-<br>2015 | <b>2.4</b><br>[2.0;2.7]     |               |                           |               |                             |
| <b>Prevalence by age group**</b> |               |               |                           |               |                             |               |                           |               |                             |
| <b>25-34</b>                     | 0.68          | 1.82          | <b>4.7</b><br>[3.7;5.6]   | 1996-<br>2007 | <b>7.7</b><br>[6.4;9.1]     | 2007-<br>2015 | <b>0.6</b><br>[-0.9;2.1]  |               |                             |
| <b>35-44</b>                     | 0.70          | 2.21          | <b>5.5</b><br>[4.3;6.7]   | 1996-<br>2011 | <b>4.5</b><br>[3.6;5.4]     | 2011-<br>2015 | <b>9.5</b><br>[4.3;15.0]  |               |                             |
| <b>45-54</b>                     | 1.55          | 3.14          | <b>4.0</b><br>[3.3;4.8]   | 1996-<br>2011 | <b>3.4</b><br>[2.8;4.0]     | 2011-<br>2015 | <b>6.5</b><br>[3.2;10.0]  |               |                             |
| <b>55-64</b>                     | 2.96          | 5.60          | <b>3.0</b><br>[2.6;3.4]   | 1996-<br>2015 | <b>3.0</b><br>[2.6;3.4]     |               |                           |               |                             |
| <b>65-74</b>                     | 6.08          | 8.97          | <b>1.7</b><br>[1.3;2.2]   | 1996-<br>2015 | <b>1.7</b><br>[1.3;2.2]     |               |                           |               |                             |
| <b>75-84</b>                     | 7.80          | 13.9          | <b>2.6</b><br>[2.0;3.2]   | 1996-<br>2007 | <b>3.6</b><br>[2.7;4.5]     | 2007-<br>2015 | <b>1.2</b><br>[0.2;2.1]   |               |                             |
| <b>≥ 85</b>                      | 6.27          | 15.0          | <b>3.0</b><br>[2.4;3.5]   | 1996-<br>2015 | <b>3.0</b><br>[2.4;3.5]     |               |                           |               |                             |
| <b>Incidence</b>                 |               |               |                           |               |                             |               |                           |               |                             |
| <b>Total</b>                     | 0.42          | 0.38          | <b>-0.5</b><br>[-1.4;0.5] | 1996-<br>2006 | <b>-2.6</b><br>[-4.0;-1.1]  | 2006-<br>2015 | <b>1.9</b><br>[0.4;3.5]   |               |                             |
| <b>Men</b>                       | 0.27          | 0.26          | <b>-0.2</b><br>[-1.4;1.1] | 1996-<br>2006 | <b>-2.5</b><br>[-4.4;-0.5]  | 2006-<br>2015 | <b>2.5</b><br>[0.5;4.5]   |               |                             |
| <b>Women</b>                     | 0.58          | 0.49          | <b>-0.5</b><br>[-2.4;1.4] | 1996-<br>1999 | <b>-8.7</b><br>[-16.2;-0.6] | 1999-<br>2013 | <b>-0.4</b><br>[-1.2;0.5] | 2013-<br>2015 | <b>11.8</b> [-<br>3.3;29.3] |

**Legend:**

AAPC, average annual percentage change; APC, annual percentage change; CI, confidence interval

\* These percentages are standardized for the total Flemish population.

\*\* Standardization was possible for the total population, but not for specific age cohorts.

1  
2  
3 \*\*\* Joinpoint regression modelling was used to estimate (A) APC in prevalence and incidence trends. Three possible trends were  
4 calculated during the 20-year study period.

5 **Statistically significant differences for (A) APC are indicated in bold.**  
6  
7  
8  
9  
10  
11  
12  
13  
14  
15  
16  
17  
18  
19  
20  
21  
22  
23  
24  
25  
26  
27  
28  
29  
30  
31  
32  
33  
34  
35  
36  
37  
38  
39  
40  
41  
42  
43  
44  
45  
46  
47  
48  
49  
50  
51  
52  
53  
54  
55  
56  
57  
58  
59  
60

For peer review only

Table 2. Trends in multimorbidity of patients with knee osteoarthritis in the Intego registry (1996-2015).

| Variables                          | 1996-2000   | 2001-2005   | 2006-2010   | 2011-2015*  | p-value** |
|------------------------------------|-------------|-------------|-------------|-------------|-----------|
| <b>Mean age (± SD)</b>             | 55.3 (21.9) | 57.6 (20.5) | 57.8 (19.8) | 56.9 (19.8) | 0.384     |
| <b>Women, n (%)</b>                | 972 (65%)   | 1234 (65%)  | 1419 (64%)  | 1412 (62%)  | 0.05224   |
| <b>Incidence, n</b>                | 1503        | 1912        | 2202        | 2288        |           |
| <b>Multimorbidity, n (%)</b>       |             |             |             |             |           |
| <b>Hypertension</b>                | 359 (24%)   | 485 (25%)   | 623 (28%)   | 593 (26%)   | 0.0756    |
| <b>Diabetes</b>                    | 93 (6%)     | 161 (8%)    | 252 (11%)   | 346 (15%)   | <0.001    |
| <b>CV events</b>                   | 323 (21%)   | 480 (25%)   | 597 (27%)   | 614 (27%)   | <0.001    |
| <b>GI complication (ulcer)</b>     | 28 (2%)     | 60 (3%)     | 59 (3%)     | 61 (3%)     | 0.3585    |
| <b>Renal failure</b>               | 23 (2%)     | 70 (4%)     | 71 (3%)     | 66 (3%)     | 0.1025    |
| <b>Depression</b>                  | 141 (9%)    | 230 (12%)   | 259 (12%)   | 287 (13%)   | 0.009     |
| <b>Obesity</b>                     | 74 (5%)     | 101 (5%)    | 145 (7%)    | 191 (8%)    | <0.001    |
| <b>Osteoporosis</b>                | 57 (4%)     | 81 (4%)     | 107 (5%)    | 103 (5%)    | 0.2303    |
| <b>Cancer</b>                      | 29 (2%)     | 60 (3%)     | 59 (3%)     | 61 (3%)     | <0.001    |
| <b>Asthma</b>                      | 125 (8%)    | 205 (11%)   | 328 (15%)   | 392 (17%)   | <0.001    |
| <b>Substance abuse</b>             | 4 (0%)      | 22 (1%)     | 31 (1%)     | 48 (2%)     | <0.001    |
| <b>Disease burden, n (± SD)***</b> | 1.63 (1.81) | 1.84 (2.00) | 2.18 (2.20) | 2.34 (2.35) | <0.001    |

**Legend:**

\* Four time intervals of five years were defined to evaluate trends for incident patients with knee osteoarthritis.

\*\* P-value for multimorbidity was calculated with the Cochran-Armitage trend test; p-value for age was calculated with the Jonckheere-Terpstra trend test.

\*\*\* The full list of diseases to calculate this mean disease burden is presented in supplementary file 3.

Table 3. Trends in medication use of patients with knee osteoarthritis in the Intego registry (1996-2015).

| Group/<br>Medication                    | Prev.<br>in<br>1996 | Prev.<br>in<br>2015 | Overall trend<br>AAPC [95% CI] | Trend 1<br>Years | APC<br>[95% CI]          | Trend 2<br>Years | APC<br>[95% CI]           | Trend 3 <sup>‡</sup><br>Years | APC<br>[95% CI]      |
|-----------------------------------------|---------------------|---------------------|--------------------------------|------------------|--------------------------|------------------|---------------------------|-------------------------------|----------------------|
| <b>Acetaminophen</b>                    | 5.3                 | 19.2                | <b>6.7 [5.6-7.7]</b>           | 1996-2010        | <b>8.0 [6.8-9.2]</b>     | 2010-2015        | <b>3.1 [0.3;5.9]</b>      |                               |                      |
| Males                                   | 5.2                 | 17.4                | <b>5.8 [4.9-6.6]</b>           |                  |                          |                  |                           |                               |                      |
| Females                                 | 5.4                 | 20.2                | <b>7.0 [5.8-8.3]</b>           | 1996-2010        | <b>8.7 [7.3;10.1]</b>    | 2010-2015        | 2.7 [-0.6;6.0]            |                               |                      |
| <b>Oral NSAID<br/>(exclusion cox-2)</b> | 28.4                | 29.4                | 0.0 [-1.1;1.1]                 | 1996-2002        | -1.0 [-3.5;1.6]          | 2002-2008        | 2.4 [-0.1;5.0]            | 2008-2015                     | -1.2 [-2.4;0.1]      |
| Males                                   | 28.6                | 28.8                | 0.5 [-0.2;1.2]                 | 1996-2009        | <b>1.1 [0.4;1.9]</b>     | 2009-2015        | 0.5 [-0.2;1.2]            |                               |                      |
| Females                                 | 28.3                | 29.6                | 0.3 [-0.1;0.8]                 |                  |                          |                  |                           |                               |                      |
| <b>Cox-2 selective<br/>NSAID</b>        | 3.0                 | 2.3                 | -7.7 [-36.0; 33.0]             | 2000-2004        | -2.7 [-29.3;33.9]        | 2004-2007        | -48.4 [-93.5; 309.5]      | 2007-2015                     | 11.8 [-3.4;29.5]     |
| Males                                   | 2.2                 | 1.8                 | <b>-13.3 [-19.3;-6.7]</b>      |                  |                          |                  |                           |                               |                      |
| Females                                 | 3.4                 | 2.7                 | -7.3 [-34.0;30.1]              | 2000-2004        | -3.3 [-29.1;32.0]        | 2004-2007        | -47.2 [-92.2; 257.6]      | 2007-2015                     | 12.0 [-2.9;29.2]     |
| <b>Topical NSAID</b>                    | 7.8                 | 5.9                 | -1.0 [-2.4; 0.4]               | 1996-2003        | <b>-4.7 [-8.1;-1.2]</b>  | 2003-2015        | 1.2 [-0.0;2.4]            |                               |                      |
| Males                                   | 9.3                 | 5.8                 | -0.9 [-2.2;0.5]                |                  |                          |                  |                           |                               |                      |
| Females                                 | 7.1                 | 5.9                 | -0.8 [-2.3;0.7]                | 1996-2003        | <b>-4.3 [-8.0;-0.4]</b>  | 2003-2015        | 1.3 [-0.0;2.6]            |                               |                      |
| <b>Weak opioids</b>                     | 2.8                 | 6.1                 | <b>4.0 [0.9;7.3]</b>           | 1996-1998        | <b>36.3 [0.4;85.2]</b>   | 1998-2009        | -0.9 [-2.3;0.5]           | 2009-2015                     | <b>4.0 [1.6;6.4]</b> |
| Males                                   | 1.5                 | 5.2                 | <b>2.9 [1.5;4.4]</b>           |                  |                          |                  |                           |                               |                      |
| Females                                 | 3.3                 | 6.7                 | 2.8 [-0.0;5.7]                 | 1996-2000        | <b>14.7 [1.6;29.4]</b>   | 2000-2008        | -3.2 [-6.4;0.2]           | 2008-2015                     | <b>3.5 [0.6;6.4]</b> |
| <b>Strong opioids</b>                   | 2.5                 | 4.3                 | 1.9 [-0.4;4.3]                 | 1996-2003        | <b>9.0 [2.5;16.0]</b>    | 2003-2015        | <b>-2.0 [-3.7;-0.3]</b>   |                               |                      |
| Males                                   | 1.7                 | 3.6                 | -0.2 [-2.0; 1.6]               |                  |                          |                  |                           |                               |                      |
| Females                                 | 2.9                 | 4.7                 | <b>2.3 [0.3;4.3]</b>           | 1996-2003        | <b>10.0 [4.4;15.9]</b>   | 2003-2015        | <b>-2.0 [-3.4;-0.5]</b>   |                               |                      |
| <b>Parenteral<br/>glucocorticoids</b>   | 9.1                 | 8.1                 | -0.7 [-1.8;0.5]                | 1996-2005        | <b>-2.1 [-3.5;-0.7]</b>  | 2005-2012        | <b>2.7 [0.8;4.7]</b>      | 2012-2015                     | -4.1 [-9.2;1.2]      |
| Males                                   | 8.1                 | 8.6                 | <b>0.8 [0.0;1.6]</b>           |                  |                          |                  |                           |                               |                      |
| Females                                 | 9.6                 | 7.9                 | <b>-1.3 [-2.6; 0.0]</b>        | 1996-2003        | <b>-3.8 [-6.0;-1.5]</b>  | 2003-2012        | <b>2.0 [0.6;3.4]</b>      | 2012-2015                     | -5.1 [-10.7;0.8]     |
| <b>Glucosamine*</b>                     | 0.6                 | 1.8                 | <b>8.6 [2.4;15.1]</b>          | 2001-2004        | <b>64.1 [25.0;115.3]</b> | 2004-2011        | <b>-9.6 [-14.3;-4.4]</b>  | 2011-2015                     | 9.8 [-0.6;21.2]      |
| Males                                   | 0.1                 | 1.8                 | 17.3 [-18.8; 69.5]             | 2001-2003        | 212.4 [-83.1;566.3]      | 2003-2015        | -0.4 [-4.8;4.2]           |                               |                      |
| Females                                 | 0.9                 | 1.8                 | <b>6.8 [0.4;13.7]</b>          | 2001-2004        | <b>56.7 [18.3;107.5]</b> | 2004-2011        | <b>-10.0 [-15.3;-4.3]</b> | 2011-2015                     | 8.2 [-3.6;21.4]      |

**Legend:**

AAPC, average annual percentage change; APC, annual percentage change; CI, confidence interval; Prev., prevalence

\*glucosamine: registration starts from 2001; cox-2 selective NSAID starts from 2000

**Bold:** indicates that the (A)APC is significantly different from zero at the alpha= 0.05 level

<sup>‡</sup>= three possible time trends were computed with the joinpoint regression analysis. The corresponding time cohorts and APC are mentioned in these three columns

Figure 1.

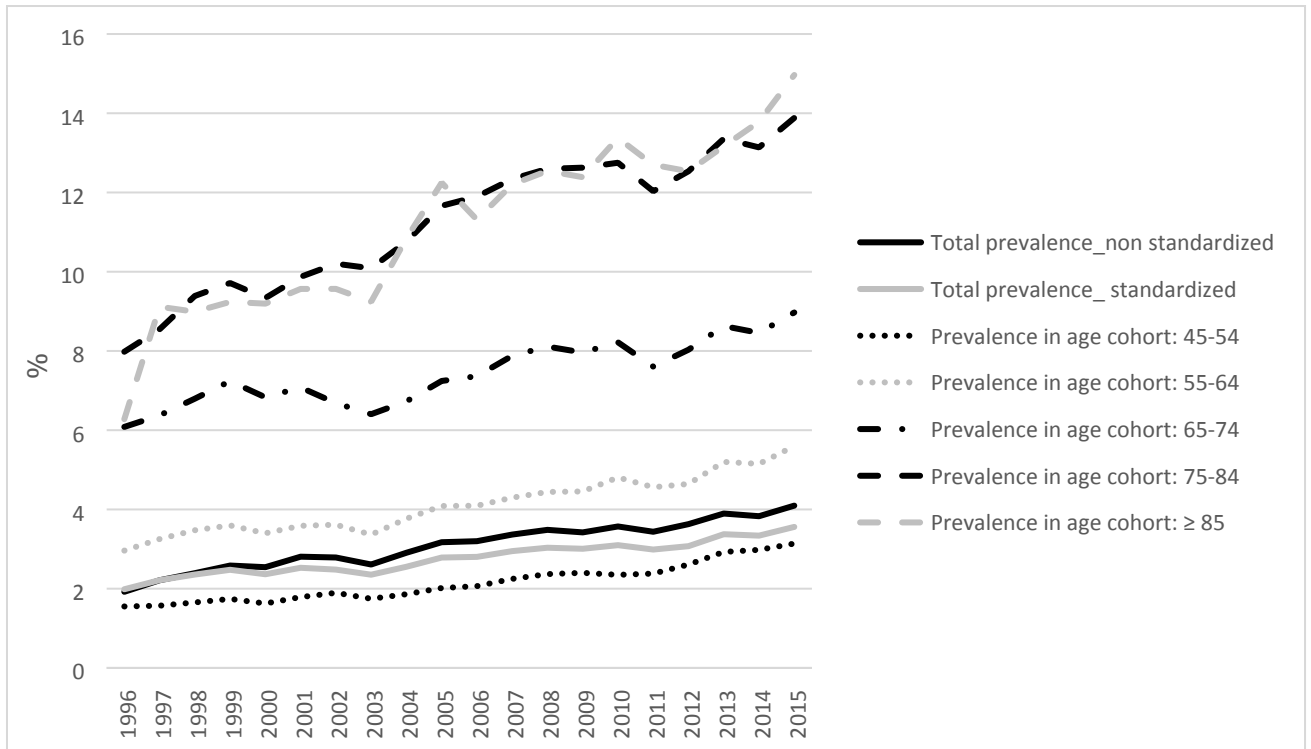

Review only

Figure 2.



Review only

Figure 3.

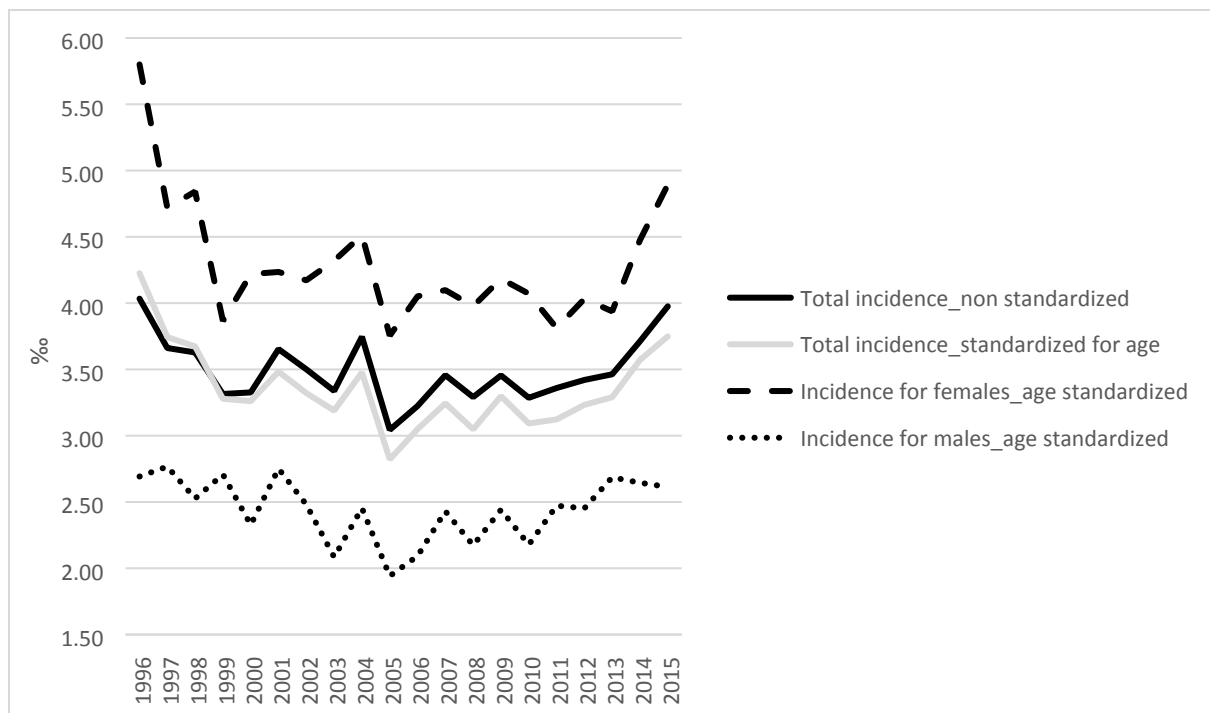

review only

## Number of people in the yearly contact group (by gender and age cohort) in Intego (1996-2015)

| Year                        | 1996   | 1997   | 1998   | 1999   | 2000   | 2001   | 2002   | 2003   | 2004   | 2005   |
|-----------------------------|--------|--------|--------|--------|--------|--------|--------|--------|--------|--------|
| <b>Yearly contact group</b> | 83011  | 81763  | 85940  | 86535  | 95932  | 90973  | 106664 | 125202 | 120962 | 128251 |
| <b>Total prevalence</b>     | 1595   | 1809   | 2055   | 2236   | 2439   | 2554   | 2973   | 3268   | 3516   | 4069   |
| <b>knee osteoarthritis*</b> | (1.92) | (2.21) | (2.39) | (2.58) | (2.54) | (2.81) | (2.79) | (2.61) | (2.91) | (3.17) |
| <b>By gender</b>            |        |        |        |        |        |        |        |        |        |        |
| Male                        | 39648  | 38927  | 40796  | 41252  | 45478  | 43325  | 50857  | 59759  | 57700  | 61446  |
| Female                      | 43363  | 42836  | 45144  | 45283  | 50454  | 47648  | 55807  | 65443  | 63262  | 66805  |
| <b>By age cohort</b>        |        |        |        |        |        |        |        |        |        |        |
| ≤ 24 year                   | 23732  | 23712  | 24493  | 24206  | 25165  | 24237  | 29108  | 34424  | 32142  | 34294  |
| 25-34 year                  | 14859  | 13322  | 13741  | 13243  | 14185  | 12899  | 14699  | 17477  | 16617  | 17538  |
| 35-44 year                  | 13919  | 13462  | 14123  | 14240  | 16502  | 14404  | 16189  | 19282  | 18303  | 19040  |
| 45-54 year                  | 9993   | 10315  | 11193  | 11599  | 13405  | 12812  | 14933  | 17469  | 17199  | 18450  |
| 55-64 year                  | 8107   | 8148   | 8633   | 8675   | 9798   | 9729   | 11704  | 13731  | 13754  | 14826  |
| 65-74 year                  | 7266   | 7357   | 7755   | 8027   | 9121   | 8943   | 10488  | 11961  | 11950  | 12247  |
| 75-84 year                  | 3797   | 3955   | 4367   | 4694   | 5559   | 5785   | 7097   | 8218   | 8414   | 8900   |
| ≥ 85 year                   | 1338   | 1492   | 1635   | 1851   | 2197   | 2164   | 2446   | 2640   | 2583   | 2956   |



1  
2  
3  
4  
5  
6  
7  
8  
9  
10  
11  
12  
13  
14  
15  
16  
17  
18  
19  
20  
21  
22  
23  
24  
25  
26  
27  
28  
29  
30  
31  
32  
33  
34  
35  
36  
37  
38  
39  
40  
41  
42  
43  
44  
45  
46

| <b>Year</b>                 | <b>2006</b> | <b>2007</b> | <b>2008</b> | <b>2009</b> | <b>2010</b> | <b>2011</b> | <b>2012</b> | <b>2013</b> | <b>2014</b> | <b>2015</b> |
|-----------------------------|-------------|-------------|-------------|-------------|-------------|-------------|-------------|-------------|-------------|-------------|
| <b>Yearly contact group</b> | 133931      | 132322      | 134733      | 140259      | 140126      | 151971      | 127717      | 130398      | 131651      | 123261      |
| <b>Total prevalence</b>     | 4284        | 4454        | 4695        | 4798        | 5003        | 5223        | 4635        | 5081        | 5041        | 5049        |
| <b>Knee osteoarthritis*</b> | (3.20)      | (3.37)      | (3.48)      | (3.42)      | (3.57)      | (3.44)      | (3.63)      | (3.90)      | (3.83)      | (4.09)      |
| <b>By gender</b>            |             |             |             |             |             |             |             |             |             |             |
| Male                        | 64012       | 63472       | 64423       | 67305       | 67075       | 72892       | 60829       | 62541       | 63404       | 58841       |
| Female                      | 69919       | 68850       | 70310       | 72954       | 73051       | 79079       | 66888       | 67857       | 68247       | 64420       |
| <b>By age cohort</b>        |             |             |             |             |             |             |             |             |             |             |
| ≤ 24 year                   | 35769       | 35655       | 36210       | 38384       | 38014       | 41116       | 34065       | 35626       | 35673       | 33736       |
| 25-34 year                  | 18551       | 18311       | 18916       | 20113       | 20003       | 21668       | 18264       | 18804       | 19578       | 17818       |
| 35-44 year                  | 19640       | 18767       | 18672       | 19137       | 18627       | 19883       | 16597       | 16865       | 17434       | 15937       |
| 45-54 year                  | 19379       | 19220       | 19595       | 20210       | 20345       | 22093       | 17972       | 18207       | 18220       | 16950       |
| 55-64 year                  | 15512       | 15636       | 16054       | 16523       | 16827       | 18570       | 15657       | 15827       | 16037       | 15415       |
| 65-74 year                  | 12372       | 12135       | 12108       | 12347       | 12363       | 13780       | 11505       | 11567       | 11494       | 11169       |
| 75-84 year                  | 9305        | 9214        | 9439        | 9694        | 9835        | 10388       | 9070        | 8938        | 8601        | 8140        |
| ≥ 85 year                   | 3403        | 3384        | 3739        | 3851        | 4112        | 4473        | 4587        | 4564        | 4614        | 4096        |

**Legend:**  
 \*(%) = proportion of patients with knee osteoarthritis. This proportion describes the data from the Intego registry and is not standardized for the total Flemish population.

## Participation of GP practices in Intego (1996-2015)

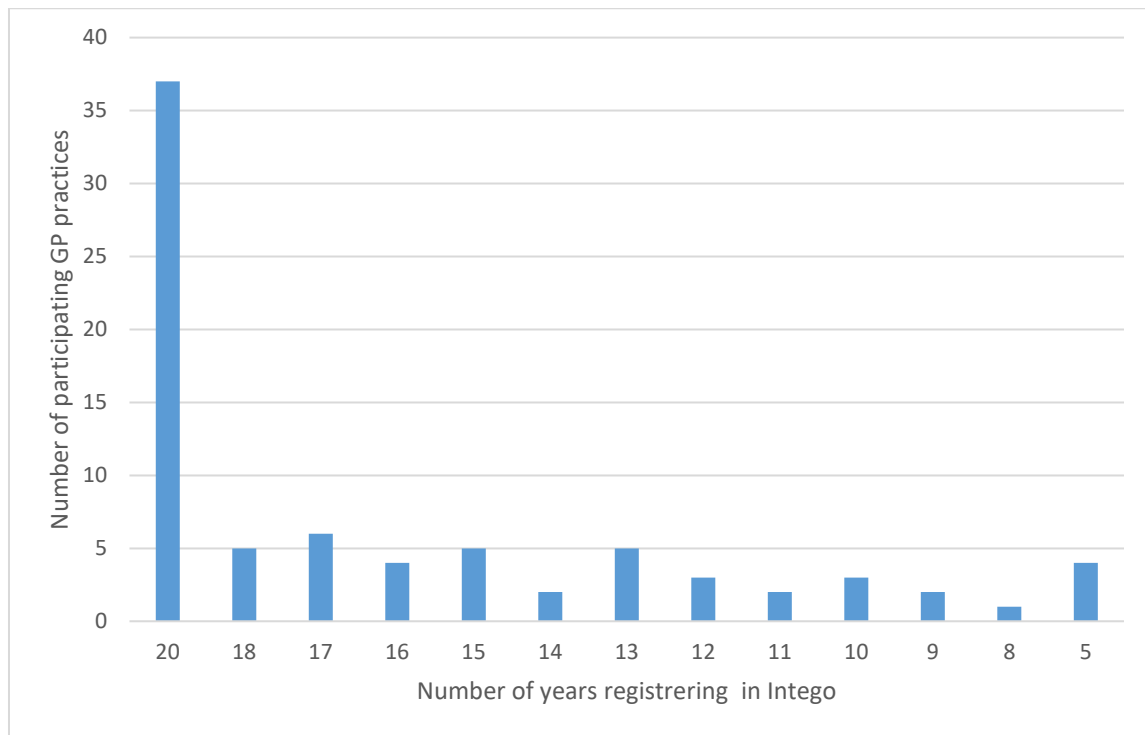

## ICPC codes and description of codes for the disease count

### Codes to measure the disease count

The combination of the following 92 ICPC-2 codes were used to measure the disease count. If codes are not mutually exclusive (e.g. T89 and T90), then they count for one.

| ICPC code | Description                        |
|-----------|------------------------------------|
| A79       | Malignancy NOS                     |
| A90       | Congenital anomaly OS/multiple     |
| B72       | Hodgkin's disease/lymphoma         |
| B73       | Leukaemia                          |
| B74       | Malignant neoplasm blood other     |
| B78       | Hereditary haemolytic anaemia      |
| B83       | Purpura/coagulation defect         |
| B90       | HIV-infection/aids                 |
| D74       | Malignant neoplasm stomach         |
| D75       | Malignant neoplasm colon/rectum    |
| D76       | Malignant neoplasm pancreas        |
| D77       | Malig. neoplasm digest other/NOS   |
| F83       | Retinopathy                        |
| F84       | Macular degeneration               |
| F94       | Blindness                          |
| H83       | Otosclerosis                       |
| H84       | Presbycusis                        |
| H86       | Deafness                           |
| K74       | Ischaemic heart disease w. angina  |
| K75       | Acute myocardial infarction        |
| K76       | Ischaemic heart disease w/o angina |
| K77       | Heart failure                      |
| K82       | Pulmonary heart disease            |
| K86       | Hypertension uncomplicated         |
| K87       | Hypertension complicated           |
| K90       | Stroke/cerebrovascular accident    |
| K91       | Cerebrovascular disease            |
| K92       | Atherosclerosis/PVD                |
| K93       | Pulmonary embolism                 |
| K94       | Phlebitis/thrombophlebitis         |
| L84       | Back syndrome w/o radiating pain   |
| L85       | Acquired deformity of spine        |
| L88       | Reumatoide arthritis               |
| L89       | Osteoarthritis of hip              |
| L90       | Osteoarthritis of knee             |
| L91       | Osteoarthritis other               |
| L95       | Osteoporosis                       |
| L98       | Acquired deformity of limb         |
| N70       | Poliomyelitis                      |
| N74       | Malignant neoplasm nervous system  |
| N85       | Congenital anomaly neurological    |
| N86       | Multiple sclerosis                 |
| N87       | Parkinsonism                       |

|     |                                       |
|-----|---------------------------------------|
| N88 | Epilepsy                              |
| N89 | Migraine                              |
| N90 | Cluster headache                      |
| N92 | Trigeminal neuralgia                  |
| P15 | Substance abuse: chronic alcohol      |
| P28 | Limited function/disability (p)       |
| P70 | Dementia                              |
| P71 | Organic psychosis other               |
| P72 | Schizophrenia                         |
| P73 | Affective psychosis                   |
| P74 | Anxiety disorder/anxiety state        |
| P75 | Somatization disorder                 |
| P76 | Depressive disorder                   |
| P77 | Suicide/suicide attempt               |
| P79 | Phobia/compulsive disorder            |
| P80 | Personality disorder                  |
| P85 | Mental retardation                    |
| P98 | Psychosis NOS/other                   |
| R79 | Chronic bronchitis                    |
| R84 | Malignant neoplasm bronchus/lung      |
| R85 | Malignant neoplasm respiratory, other |
| R95 | Chronic obstructive pulmonary disease |
| R96 | Asthma                                |
| S77 | Malignant neoplasm of skin            |
| S87 | Dermatitis/atopic eczema              |
| S91 | Psoriasis                             |
| S97 | Chronic ulcer skin                    |
| T71 | Malignant neoplasm thyroid            |
| T80 | Congenital anom endocrine/metab.      |
| T85 | Hyperthyroidism/thyrototoxicosis      |
| T86 | Hypothyroidism/myxoedema              |
| T89 | Diabetes insulin dependent            |
| T90 | Diabetes non-insulin dependent        |
| T92 | Gout                                  |
| T93 | Lipid disorder                        |
| T99 | Endocrine/metab/nutrit. dis. other    |
| U04 | Incontinence urine                    |
| U75 | Malignant neoplasm of kidney          |
| U76 | Malignant neoplasm of bladder         |
| U77 | Malignant neoplasm urinary other      |
| U85 | Congenital anomaly urinary tract      |
| U88 | Glomerulonephritis/nephrosis          |
| W72 | Malignant neoplasm relate to preg.    |
| X75 | Malignant neoplasm cervix             |
| X76 | Malignant neoplasm breast female      |
| X77 | Malignant neoplasm genital other (f)  |
| Y77 | Malignant neoplasm prostate           |
| Y78 | Malign neoplasm male genital other    |
| Y85 | Benign prostatic hypertrophy          |

### Other ICPC codes used in this manuscript

| ICPC code | description                                             |
|-----------|---------------------------------------------------------|
| P17       | Substance abuse: tobacco                                |
| P19       | Substance abuse: drug abuse                             |
| L89       | Osteoarthritis of the hip                               |
| L90       | Osteoarthritis of the knee                              |
| L91       | Osteoarthritis of other locations (other than knee/hip) |

### ICPC codes used with Intego software to define multimorbidity

#### Definition of cancer

Intego uses a set of 22 ICPC-2 codes to define cancer as a multimorbidity: A79, B73, B72, B74, D74, D75, D76, D77, L71, N74, R84, R85, T71, U75, U76, U77, W72, X75, X76, X77, Y77, and Y78.

#### Definition of substance abuse

Intego uses a combination of three ICPC-2 codes to define substance abuse: P15, P 17, and P19.

ACT coding for pharmacological agents used in the management of knee osteoarthritis.

|                                        | <b>ACT coding</b>                                                                                                     |
|----------------------------------------|-----------------------------------------------------------------------------------------------------------------------|
| Acetaminophen                          | N02BE01                                                                                                               |
| Oral NSAID (exclusion cox-2 selective) | M01AB<br>M01AC-M01AE<br>M01AG                                                                                         |
| COX-2 selective NSAID                  | M01AH                                                                                                                 |
| Topical NSAID                          | M02AA                                                                                                                 |
| Glucosamine supplements                | M01AX05                                                                                                               |
| Chondroitin supplements                | M01AX25                                                                                                               |
| Hyaluronic acid                        | M09AX01                                                                                                               |
| Weak opioids                           | N02AX02<br>N02AJ01<br>N02AJ02<br>N02AJ03<br>N02AJ06<br>N02AJ07<br>N02AJ08<br>N02AJ09<br>N02AJ13<br>N02AJ14<br>N02AJ15 |
| Strong opioids                         | N02AA<br>N02AB<br>N02AC<br>N02AD<br>N02AE<br>N02AF                                                                    |
| Glucocorticoids                        | H02AB                                                                                                                 |

## Demographic characteristics of patients with knee osteoarthritis in Intego registry (1996, 2005, and 2015).

|                                          | 1996***     |                                                 | 2005        |                                                 | 2015        |                                                 |
|------------------------------------------|-------------|-------------------------------------------------|-------------|-------------------------------------------------|-------------|-------------------------------------------------|
|                                          | n/N         | %<br>Non-<br>standardized<br>vs<br>standardized | n/N         | %<br>Non-<br>standardized<br>vs<br>standardized | n/N         | %<br>Non-<br>standardized<br>vs<br>standardized |
| <b>Prevalence,<br/>gender</b>            |             |                                                 |             |                                                 |             |                                                 |
| <b>Total</b>                             | 1.595/83011 | 1.92; 1.99                                      | 4069/128251 | 3.17;2.79                                       | 5049/123261 | 4.09; 3.56                                      |
| <b>Men</b>                               | 518/39648   | 1.31; 1.32                                      | 1348/61446  | 2.20;1.97                                       | 1817/58841  | 3.09; 2.59                                      |
| <b>Women</b>                             | 1077/43363  | 2.48; 2.64                                      | 2721/66805  | 4.07;3.67                                       | 3232/64420  | 5.02;4.55                                       |
| <b>Prevalence,<br/>age<br/>cohorts**</b> |             |                                                 |             |                                                 |             |                                                 |
| <b>≤ 24</b>                              | 172         | 1.59                                            | 307         | 1.89                                            | 232         | 1.56                                            |
| <b>25-34</b>                             | 101         | 0.68                                            | 272         | 1.55                                            | 324         | 1.82                                            |
| <b>35-44</b>                             | 98          | 0.70                                            | 225         | 1.18                                            | 353         | 2.22                                            |
| <b>45-54</b>                             | 155         | 1.55                                            | 372         | 2.01                                            | 532         | 3.13                                            |
| <b>55-64</b>                             | 240         | 2.96                                            | 606         | 4.08                                            | 863         | 5.60                                            |
| <b>65-74</b>                             | 442         | 6.08                                            | 887         | 7.24                                            | 1002        | 9.00                                            |
| <b>75-84</b>                             | 303         | 7.98                                            | 1038        | 11.66                                           | 1130        | 13.9                                            |
| <b>≥ 85</b>                              | 84          | 6.28                                            | 362         | 12.24                                           | 613         | 15.0                                            |
| <b>Incidence,<br/>gender</b>             |             |                                                 |             |                                                 |             |                                                 |
| <b>Total</b>                             | 325/81416   | 0.40; 0.42                                      | 378/124182  | 0.30;0.28                                       | 470/118212  | 0.40; 0.38                                      |
| <b>Men</b>                               | 102/39130   | 0.26; 0.27                                      | 129/60098   | 0.21;0.19                                       | 167/57024   | 0.29; 0.26                                      |
| <b>Women</b>                             | 223/42286   | 0.53; 0.58                                      | 249/64084   | 0.39;0.38                                       | 303/61188   | 0.50;0.49                                       |

### **Legend:**

**N=**yearly contact group: the number of patients that visited their general practitioner at least once during once year

**\***the first % refers to the age-specific data from the Intego register; the second % is the standardized Intego data for the total Flemish population.

**\*\*** Standardization was possible for the total population, but not for specific age cohorts.

**\*\*\*** Data are available for 20-year period. In this table 10-year interval periods are described.

## The RECORD statement

Checklist of items, extended from the STROBE statement that should be reported in observational studies using routinely collected health data.

|                           | Item No. | STROBE items                                                                                                                                                                               | Location in manuscript where items are reported | RECORD items                                                                                                                                                                                                                                                                                                                                                                                                                                       | Location in manuscript where items are reported                                                  |
|---------------------------|----------|--------------------------------------------------------------------------------------------------------------------------------------------------------------------------------------------|-------------------------------------------------|----------------------------------------------------------------------------------------------------------------------------------------------------------------------------------------------------------------------------------------------------------------------------------------------------------------------------------------------------------------------------------------------------------------------------------------------------|--------------------------------------------------------------------------------------------------|
| <b>Title and abstract</b> |          |                                                                                                                                                                                            |                                                 |                                                                                                                                                                                                                                                                                                                                                                                                                                                    |                                                                                                  |
|                           | 1        | (a) Indicate the study's design with a commonly used term in the title or the abstract (b) Provide in the abstract an informative and balanced summary of what was done and what was found |                                                 | <p>RECORD 1.1: The type of data used should be specified in the title or abstract. When possible, the name of the databases used should be included.</p> <p>RECORD 1.2: If applicable, the geographic region and timeframe within which the study took place should be reported in the title or abstract.</p> <p>RECORD 1.3: If linkage between databases was conducted for the study, this should be clearly stated in the title or abstract.</p> | <p>1.1: Title (Title page and abstract)</p> <p>1.2 Geographic region: abstract</p> <p>1.3 NA</p> |
| <b>Introduction</b>       |          |                                                                                                                                                                                            |                                                 |                                                                                                                                                                                                                                                                                                                                                                                                                                                    |                                                                                                  |
| Background rationale      | 2        | Explain the scientific background and rationale for the investigation being reported                                                                                                       |                                                 |                                                                                                                                                                                                                                                                                                                                                                                                                                                    | Introduction, p.2, paragraph 1-4                                                                 |
| Objectives                | 3        | State specific objectives, including any prespecified hypotheses                                                                                                                           |                                                 |                                                                                                                                                                                                                                                                                                                                                                                                                                                    | Introduction, p.2, paragraph 4                                                                   |
| <b>Methods</b>            |          |                                                                                                                                                                                            |                                                 |                                                                                                                                                                                                                                                                                                                                                                                                                                                    |                                                                                                  |
| Study Design              | 4        | Present key elements of study design early in the paper                                                                                                                                    |                                                 |                                                                                                                                                                                                                                                                                                                                                                                                                                                    | Methods, p. 3, design                                                                            |



|                                                                                                                                                                 |                              |   |                                                                                                                                                                                                                                                                                                                                                                                                                                                                                                                                                                                                                                                                                                                              |                                                                                                                                                                                                                                                                                                                                                                                                                                                                                                                                                                                                                                                                                                      |                                                                                                                                                                                                                 |
|-----------------------------------------------------------------------------------------------------------------------------------------------------------------|------------------------------|---|------------------------------------------------------------------------------------------------------------------------------------------------------------------------------------------------------------------------------------------------------------------------------------------------------------------------------------------------------------------------------------------------------------------------------------------------------------------------------------------------------------------------------------------------------------------------------------------------------------------------------------------------------------------------------------------------------------------------------|------------------------------------------------------------------------------------------------------------------------------------------------------------------------------------------------------------------------------------------------------------------------------------------------------------------------------------------------------------------------------------------------------------------------------------------------------------------------------------------------------------------------------------------------------------------------------------------------------------------------------------------------------------------------------------------------------|-----------------------------------------------------------------------------------------------------------------------------------------------------------------------------------------------------------------|
| 1<br>2<br>3<br>4                                                                                                                                                | Setting                      | 5 | Describe the setting, locations, and relevant dates, including periods of recruitment, exposure, follow-up, and data collection                                                                                                                                                                                                                                                                                                                                                                                                                                                                                                                                                                                              |                                                                                                                                                                                                                                                                                                                                                                                                                                                                                                                                                                                                                                                                                                      | Methods, pp. 3-4, design and data collection                                                                                                                                                                    |
| 5<br>6<br>7<br>8<br>9<br>10<br>11<br>12<br>13<br>14<br>15<br>16<br>17<br>18<br>19<br>20<br>21<br>22<br>23<br>24<br>25<br>26<br>27<br>28<br>29<br>30<br>31<br>32 | Participants                 | 6 | <p>(a) <i>Cohort study</i> - Give the eligibility criteria, and the sources and methods of selection of participants. Describe methods of follow-up</p> <p><i>Case-control study</i> - Give the eligibility criteria, and the sources and methods of case ascertainment and control selection. Give the rationale for the choice of cases and controls</p> <p><i>Cross-sectional study</i> - Give the eligibility criteria, and the sources and methods of selection of participants</p> <p>(b) <i>Cohort study</i> - For matched studies, give matching criteria and number of exposed and unexposed</p> <p><i>Case-control study</i> - For matched studies, give matching criteria and the number of controls per case</p> | <p>RECORD 6.1: The methods of study population selection (such as codes or algorithms used to identify subjects) should be listed in detail. If this is not possible, an explanation should be provided.</p> <p>RECORD 6.2: Any validation studies of the codes or algorithms used to select the population should be referenced. If validation was conducted for this study and not published elsewhere, detailed methods and results should be provided.</p> <p>RECORD 6.3: If the study involved linkage of databases, consider use of a flow diagram or other graphical display to demonstrate the data linkage process, including the number of individuals with linked data at each stage.</p> | <p>6.1 Methods, p. 3, supplementary file 3 for the ICPC codes and supplementary file 4 for the ACT codes</p> <p>6.2 Intego registry external validation described in Truyers et al. Reference</p> <p>6.3 NA</p> |
| 33<br>34<br>35<br>36<br>37<br>38                                                                                                                                | Variables                    | 7 | Clearly define all outcomes, exposures, predictors, potential confounders, and effect modifiers. Give diagnostic criteria, if applicable.                                                                                                                                                                                                                                                                                                                                                                                                                                                                                                                                                                                    | RECORD 7.1: A complete list of codes and algorithms used to classify exposures, outcomes, confounders, and effect modifiers should be provided. If these cannot be reported, an explanation should be provided.                                                                                                                                                                                                                                                                                                                                                                                                                                                                                      | 7.1 Methods, p. 3, design, supplementary file 1 till 4                                                                                                                                                          |
| 39<br>40<br>41<br>42<br>43<br>44                                                                                                                                | Data sources/<br>measurement | 8 | For each variable of interest, give sources of data and details of methods of assessment (measurement).                                                                                                                                                                                                                                                                                                                                                                                                                                                                                                                                                                                                                      |                                                                                                                                                                                                                                                                                                                                                                                                                                                                                                                                                                                                                                                                                                      | Page 5: Methods, design pp. 3-4, the Intego                                                                                                                                                                     |

|                                  |    |                                                                                                                                                                                                                                                                                                                                                                                                                                                                                                                                                                      |  |                                                              |                                                                        |
|----------------------------------|----|----------------------------------------------------------------------------------------------------------------------------------------------------------------------------------------------------------------------------------------------------------------------------------------------------------------------------------------------------------------------------------------------------------------------------------------------------------------------------------------------------------------------------------------------------------------------|--|--------------------------------------------------------------|------------------------------------------------------------------------|
|                                  |    | Describe comparability of assessment methods if there is more than one group                                                                                                                                                                                                                                                                                                                                                                                                                                                                                         |  |                                                              | Database is explained in detail                                        |
| Bias                             | 9  | Describe any efforts to address potential sources of bias                                                                                                                                                                                                                                                                                                                                                                                                                                                                                                            |  |                                                              | Methods, design, p.3 and Discussion, pp. 11-12, paragraph 5            |
| Study size                       | 10 | Explain how the study size was arrived at                                                                                                                                                                                                                                                                                                                                                                                                                                                                                                                            |  |                                                              | NA                                                                     |
| Quantitative variables           | 11 | Explain how quantitative variables were handled in the analyses. If applicable, describe which groupings were chosen, and why                                                                                                                                                                                                                                                                                                                                                                                                                                        |  |                                                              | Methods, data analysis p.5                                             |
| Statistical methods              | 12 | (a) Describe all statistical methods, including those used to control for confounding<br>(b) Describe any methods used to examine subgroups and interactions<br>(c) Explain how missing data were addressed<br>(d) <i>Cohort study</i> - If applicable, explain how loss to follow-up was addressed<br><i>Case-control study</i> - If applicable, explain how matching of cases and controls was addressed<br><i>Cross-sectional study</i> - If applicable, describe analytical methods taking account of sampling strategy<br>(e) Describe any sensitivity analyses |  |                                                              | (a) methods, data analysis p.5<br>(b) NA<br>(c) NA<br>(d) NA<br>(e) NA |
| Data access and cleaning methods |    | ..                                                                                                                                                                                                                                                                                                                                                                                                                                                                                                                                                                   |  | RECORD 12.1: Authors should describe the extent to which the | 12.1 Data sharing statement, p.14                                      |

|                  |    |                                                                                                                                                                                                                                                                                                                                                 |  |                                                                                                                                                                                                                                                                                                                    |                                                                            |
|------------------|----|-------------------------------------------------------------------------------------------------------------------------------------------------------------------------------------------------------------------------------------------------------------------------------------------------------------------------------------------------|--|--------------------------------------------------------------------------------------------------------------------------------------------------------------------------------------------------------------------------------------------------------------------------------------------------------------------|----------------------------------------------------------------------------|
|                  |    |                                                                                                                                                                                                                                                                                                                                                 |  | investigators had access to the database population used to create the study population.<br><br>RECORD 12.2: Authors should provide information on the data cleaning methods used in the study.                                                                                                                    | 12.2 Availability of data and materials, p.14                              |
| Linkage          |    | ..                                                                                                                                                                                                                                                                                                                                              |  | RECORD 12.3: State whether the study included person-level, institutional-level, or other data linkage across two or more databases. The methods of linkage and methods of linkage quality evaluation should be provided.                                                                                          | NA                                                                         |
| <b>Results</b>   |    |                                                                                                                                                                                                                                                                                                                                                 |  |                                                                                                                                                                                                                                                                                                                    |                                                                            |
| Participants     | 13 | (a) Report the numbers of individuals at each stage of the study ( <i>e.g.</i> , numbers potentially eligible, examined for eligibility, confirmed eligible, included in the study, completing follow-up, and analysed)<br>(b) Give reasons for non-participation at each stage.<br>(c) Consider use of a flow diagram                          |  | RECORD 13.1: Describe in detail the selection of the persons included in the study ( <i>i.e.</i> , study population selection) including filtering based on data quality, data availability and linkage. The selection of included persons can be described in the text and/or by means of the study flow diagram. | NA                                                                         |
| Descriptive data | 14 | (a) Give characteristics of study participants ( <i>e.g.</i> , demographic, clinical, social) and information on exposures and potential confounders<br>(b) Indicate the number of participants with missing data for each variable of interest<br>(c) <i>Cohort study</i> - summarise follow-up time ( <i>e.g.</i> , average and total amount) |  |                                                                                                                                                                                                                                                                                                                    | (a) Results, pp. 6-9<br>Table 1<br>Figures 1-3<br><br>(b) NA<br><br>(c) NA |

|                                                                                              |                   |    |                                                                                                                                                                                                                                                                                                                                                                                                                                |  |                                                                                                                                                                                                                   |                                                  |
|----------------------------------------------------------------------------------------------|-------------------|----|--------------------------------------------------------------------------------------------------------------------------------------------------------------------------------------------------------------------------------------------------------------------------------------------------------------------------------------------------------------------------------------------------------------------------------|--|-------------------------------------------------------------------------------------------------------------------------------------------------------------------------------------------------------------------|--------------------------------------------------|
| 1<br>2<br>3<br>4<br>5<br>6<br>7<br>8<br>9<br>10<br>11                                        | Outcome data      | 15 | <p><i>Cohort study</i> - Report numbers of outcome events or summary measures over time</p> <p><i>Case-control study</i> - Report numbers in each exposure category, or summary measures of exposure</p> <p><i>Cross-sectional study</i> - Report numbers of outcome events or summary measures</p>                                                                                                                            |  |                                                                                                                                                                                                                   | NA                                               |
| 12<br>13<br>14<br>15<br>16<br>17<br>18<br>19<br>20<br>21<br>22<br>23<br>24<br>25<br>26<br>27 | Main results      | 16 | <p>(a) Give unadjusted estimates and, if applicable, confounder-adjusted estimates and their precision (e.g., 95% confidence interval). Make clear which confounders were adjusted for and why they were included</p> <p>(b) Report category boundaries when continuous variables were categorized</p> <p>(c) If relevant, consider translating estimates of relative risk into absolute risk for a meaningful time period</p> |  |                                                                                                                                                                                                                   | (a) Results, pp. 6-9<br>Table 1-3<br>Figures 1-3 |
| 28<br>29<br>30<br>31<br>32                                                                   | Other analyses    | 17 | Report other analyses done—e.g., analyses of subgroups and interactions, and sensitivity analyses                                                                                                                                                                                                                                                                                                                              |  |                                                                                                                                                                                                                   | NA                                               |
| 33                                                                                           | <b>Discussion</b> |    |                                                                                                                                                                                                                                                                                                                                                                                                                                |  |                                                                                                                                                                                                                   |                                                  |
| 34<br>35<br>36                                                                               | Key results       | 18 | Summarise key results with reference to study objectives                                                                                                                                                                                                                                                                                                                                                                       |  |                                                                                                                                                                                                                   | Discussion, last paragraph with conclusions p.12 |
| 37<br>38<br>39<br>40<br>41<br>42<br>43<br>44                                                 | Limitations       | 19 | Discuss limitations of the study, taking into account sources of potential bias or imprecision. Discuss both direction and magnitude of any potential bias                                                                                                                                                                                                                                                                     |  | RECORD 19.1: Discuss the implications of using data that were not created or collected to answer the specific research question(s). Include discussion of misclassification bias, unmeasured confounding, missing | Discussion, paragraph 5, pp. 11-12               |

1  
2  
3  
4  
5  
6  
7  
8  
9  
10  
11  
12  
13  
14  
15  
16  
17  
18  
19  
20  
21  
22  
23  
24  
25  
26  
27  
28  
29  
30  
31  
32  
33  
34  
35  
36  
37  
38  
39  
40  
41  
42  
43  
44  
45  
46  
47

|                                                           |    |                                                                                                                                                                            |  |                                                                                                                                                          |                                          |
|-----------------------------------------------------------|----|----------------------------------------------------------------------------------------------------------------------------------------------------------------------------|--|----------------------------------------------------------------------------------------------------------------------------------------------------------|------------------------------------------|
|                                                           |    |                                                                                                                                                                            |  | data, and changing eligibility over time, as they pertain to the study being reported.                                                                   |                                          |
| Interpretation                                            | 20 | Give a cautious overall interpretation of results considering objectives, limitations, multiplicity of analyses, results from similar studies, and other relevant evidence |  |                                                                                                                                                          | Discussion, pp. 10-12                    |
| Generalisability                                          | 21 | Discuss the generalisability (external validity) of the study results                                                                                                      |  |                                                                                                                                                          | Discussion, pp. 10-12                    |
| <b>Other Information</b>                                  |    |                                                                                                                                                                            |  |                                                                                                                                                          |                                          |
| Funding                                                   | 22 | Give the source of funding and the role of the funders for the present study and, if applicable, for the original study on which the present article is based              |  |                                                                                                                                                          | Funding, p.14                            |
| Accessibility of protocol, raw data, and programming code |    | ..                                                                                                                                                                         |  | RECORD 22.1: Authors should provide information on how to access any supplemental information such as the study protocol, raw data, or programming code. | Availability of data and materials, p.14 |

\*Reference: Benchimol EI, Smeeth L, Guttman A, Harron K, Moher D, Petersen I, Sørensen HT, von Elm E, Langan SM, the RECORD Working Committee. The REporting of studies Conducted using Observational Routinely-collected health Data (RECORD) Statement. *PLoS Medicine* 2015; in press.

# BMJ Open

## The epidemiology of knee osteoarthritis in general practice: a registry-based study

|                                 |                                                                                                                                                                                                                                                                                                                                                                                                                                                                                                                                                                                                                                                                                                                                                                                                                                                                                                                                           |
|---------------------------------|-------------------------------------------------------------------------------------------------------------------------------------------------------------------------------------------------------------------------------------------------------------------------------------------------------------------------------------------------------------------------------------------------------------------------------------------------------------------------------------------------------------------------------------------------------------------------------------------------------------------------------------------------------------------------------------------------------------------------------------------------------------------------------------------------------------------------------------------------------------------------------------------------------------------------------------------|
| Journal:                        | <i>BMJ Open</i>                                                                                                                                                                                                                                                                                                                                                                                                                                                                                                                                                                                                                                                                                                                                                                                                                                                                                                                           |
| Manuscript ID                   | bmjopen-2019-031734.R3                                                                                                                                                                                                                                                                                                                                                                                                                                                                                                                                                                                                                                                                                                                                                                                                                                                                                                                    |
| Article Type:                   | Original research                                                                                                                                                                                                                                                                                                                                                                                                                                                                                                                                                                                                                                                                                                                                                                                                                                                                                                                         |
| Date Submitted by the Author:   | 13-Dec-2019                                                                                                                                                                                                                                                                                                                                                                                                                                                                                                                                                                                                                                                                                                                                                                                                                                                                                                                               |
| Complete List of Authors:       | Spitaels, David; Katholieke Universiteit Leuven, Departement of Public Health and Primary Care<br>Mamouris, Pavlos; Katholieke Universiteit Leuven Groep Biomedische Wetenschappen, Departement of Public Health and Primary Care<br>Vaes, Bert; Katholieke Universiteit Leuven Groep Biomedische Wetenschappen, Departement of Public Health and Primary Care;<br>Universite catholique de Louvain, Louvain Drug Research Institute<br>Smeets, Miek; Katholieke Universiteit Leuven Groep Biomedische Wetenschappen, Departement of Public Health and Primary Care<br>Luyten, F; Katholieke Universiteit Leuven UZ Leuven, Rheumatology<br>Hermens, Rosella; Radboudumc IQ healthcare; Katholieke Universiteit Leuven Groep Biomedische Wetenschappen, Departement of Public Health and Primary Care<br>Vankrunkelsven, Patrik; Katholieke Universiteit Leuven Groep Humane Wetenschappen, Departement of Public Health and Primary Care |
| <b>Primary Subject Heading</b>: | Epidemiology                                                                                                                                                                                                                                                                                                                                                                                                                                                                                                                                                                                                                                                                                                                                                                                                                                                                                                                              |
| Secondary Subject Heading:      | General practice / Family practice, Rheumatology                                                                                                                                                                                                                                                                                                                                                                                                                                                                                                                                                                                                                                                                                                                                                                                                                                                                                          |
| Keywords:                       | Knee < ORTHOPAEDIC & TRAUMA SURGERY, Musculoskeletal disorders < ORTHOPAEDIC & TRAUMA SURGERY, PRIMARY CARE, PUBLIC HEALTH                                                                                                                                                                                                                                                                                                                                                                                                                                                                                                                                                                                                                                                                                                                                                                                                                |
|                                 |                                                                                                                                                                                                                                                                                                                                                                                                                                                                                                                                                                                                                                                                                                                                                                                                                                                                                                                                           |

SCHOLARONE™  
Manuscripts



I, the Submitting Author has the right to grant and does grant on behalf of all authors of the Work (as defined in the below author licence), an exclusive licence and/or a non-exclusive licence for contributions from authors who are: i) UK Crown employees; ii) where BMJ has agreed a CC-BY licence shall apply, and/or iii) in accordance with the terms applicable for US Federal Government officers or employees acting as part of their official duties; on a worldwide, perpetual, irrevocable, royalty-free basis to BMJ Publishing Group Ltd ("BMJ") its licensees and where the relevant Journal is co-owned by BMJ to the co-owners of the Journal, to publish the Work in this journal and any other BMJ products and to exploit all rights, as set out in our [licence](#).

The Submitting Author accepts and understands that any supply made under these terms is made by BMJ to the Submitting Author unless you are acting as an employee on behalf of your employer or a postgraduate student of an affiliated institution which is paying any applicable article publishing charge ("APC") for Open Access articles. Where the Submitting Author wishes to make the Work available on an Open Access basis (and intends to pay the relevant APC), the terms of reuse of such Open Access shall be governed by a Creative Commons licence – details of these licences and which [Creative Commons](#) licence will apply to this Work are set out in our licence referred to above.

Other than as permitted in any relevant BMJ Author's Self Archiving Policies, I confirm this Work has not been accepted for publication elsewhere, is not being considered for publication elsewhere and does not duplicate material already published. I confirm all authors consent to publication of this Work and authorise the granting of this licence.

# The epidemiology of knee osteoarthritis in general practice: a registry-based study

## Authors

David Spitaels<sup>1</sup>; Pavlos Mamouris<sup>1</sup>; Bert Vaes<sup>1,2</sup>; Miek Smeets<sup>1</sup>; Frank Luyten<sup>3</sup>; Rosella Hermens<sup>1,4</sup>;  
Patrik Vankrunkelsven<sup>1</sup>

## Affiliations

<sup>1</sup> Academic Center for General Practice, KU Leuven, Leuven, Belgium

<sup>2</sup> Louvain Drug Research Institute, Clinical Pharmacy Research Group and Institute of Health and Society (IRSS), Université catholique de Louvain (UCL), Brussels, Belgium

<sup>3</sup> Division of Rheumatology, University Hospitals Leuven, Leuven, Belgium

<sup>4</sup> Radboud Institute for Health Sciences (RIHS), IQ Healthcare, Radboud University Medical Center

## Correspondence

D. Spitaels, MD, ORCID ID 0000-0002-7900-7533

Academic Center for General Practice, KU Leuven

Kapucijnenvoer 33, J building, 3000 Leuven, Belgium

E-mail: [david.spitaels@kuleuven.be](mailto:david.spitaels@kuleuven.be)

## Word count

3507/4000



# The epidemiology of knee osteoarthritis in general practice: a registry-based study

## Abstract

**Objectives** The present study investigated (i) trends in the prevalence and incidence of knee osteoarthritis over a 20-year period (1996-2015); (ii) trends in multimorbidity; and (iii) trends in drug prescriptions.

**Design** Registry-based study.

**Setting** Primary health care, Flanders, Belgium.

**Participants** Data were collected from Intego, a general practice-based morbidity registration network. In the study period between 1996 and 2015 data from 440,140 unique patients were available.

**Outcome measures** Trends in prevalence and incidence rate of knee osteoarthritis were computed using joinpoint regression analysis. The mean disease count was calculated to assess trends in multimorbidity. In addition, the number of drug prescriptions was identified by the Anatomical Therapeutic Chemical Classification code and trends were equally recorded with joinpoint regression.

**Results** The total age-standardized prevalence of knee osteoarthritis increased from 2.0% in 1996 to 3.6% in 2015. An upward trend was observed with an average annual percentage change (AAPC) of 2.5 (95%CI 2.2-2.9). In 2015, the prevalence rates in the 10-year age groups from the 45-54 years age group onwards were 3.1%, 5.6%, 9.0% and 13.9%, to reach 15.0% in people aged 85 years and older. The incidence remained stable with 3.75‰ in 2015 (AAPC=-0.5, 95%CI -1.4-0.5). The mean disease count significantly increased from 1.63 to 2.34 ( $p<0.001$ ) for incident cases with knee osteoarthritis. Finally, we observed a significantly positive trend in the overall prescription of acetaminophen (AAPC= 6.7, 95%CI 5.6-7.7), weak opioids (AAPC= 4.0, 95%CI 0.9-7.3) and glucosamine (AAPC= 8.6, 95%CI 2.4-15.1). Oral NSAIDs were most prescribed, with a prevalence rate of 29.8% in 2015, but remained stable during the study period (AAPC=0.0, 95%CI -1.1-1.1).

**Conclusions** Increased prevalence, multimorbidity, and number of drug prescriptions confirm an increased burden of knee osteoarthritis. In future, these trends can be used to prioritize initiatives for improvement in care.

## Key Words

Knee osteoarthritis; multimorbidity; general practice; trends; burden of illness

## Article Summary

### Strengths and limitations of this study

- The Intego open registry, with primary care data over a 20-year time period (1996-2015), is representative for the Flemish population and lends itself for trend analyses.
- Estimates on the prevalence and incidence of knee osteoarthritis are scarce for primary care settings. This study defines knee osteoarthritis when it becomes a healthcare problem for the patient.
- Data completeness depends on the quality of registration of the participating general practitioners. To this end, only optimal registration practices are included in the Intego database.
- The lack of data verification and misclassification is minimalised because new diagnoses are automatically linked to ICPC-2 and ICD-10 codes.

### Introduction

Osteoarthritis (OA) is the most common joint disease and is expected to become the fourth leading cause of disability worldwide by 2020.<sup>1</sup> OA mainly affects the joints of the knees, hips, hands, facets and feet, but knee OA accounts for 83% of the total OA burden.<sup>2</sup> The prevalence of knee OA varies according to the definition: from subjective (population-based) assessments to clinical and radiographic definitions, often with low levels of concordance between them.<sup>3</sup> However, estimates on the prevalence of knee OA are scarce for primary care settings.<sup>4</sup>

At present, the purposes of conservative knee OA treatment are to alleviate pain, to improve the function of the joint and to slow down joint damage by pharmacological and non-pharmacological means.<sup>5</sup> All patients should be offered the following core conservative interventions: information to enhance their understanding about OA, advice to exercise, and to achieve weight loss for people who are obese or overweight.<sup>6 7</sup> Pharmacological management is dominated both by acetaminophen and by nonsteroidal anti-inflammatory drugs (NSAIDs).<sup>5 8 9</sup> The presence of multimorbidity may also affect choices in the pharmacological management, since multimorbidity and polypharmacy are closely related.<sup>6 10 11</sup> OA has one of the highest rates of multimorbidity for patients who are managed in general practice.<sup>12 13</sup> Common multimorbidities in patients with knee OA are cardiovascular diseases, diabetes mellitus, chronic obstructive pulmonary disease, and obesity.<sup>14</sup> Nevertheless, multimorbidity-adapted management protocols are being developed and provide tailored guidance for pharmacological management and exercise therapy.<sup>5 7</sup> Numerous reports indicate that the number of people suffering from chronic diseases, multimorbidity and polypharmacy continues to increase, but those studies are mainly based on cross-sectional studies in different populations.<sup>15</sup> Time trends in the prevalence of multimorbidity and

polypharmacy are scarce.<sup>16 17</sup> The Flemish primary care-based Intego database offers the opportunity to extract “real world” data and evaluate time trends.

The aims of the present study were 1) to evaluate time trends in the prevalence and incidence of patients with knee OA managed in general practice; 2) to assess trends in multimorbidity and 3) to assess trends in drug prescriptions over a 20-year period.

## Methods

### Data source

This trend analysis study was performed using Intego, a general practice-based morbidity registration network in Flanders, Belgium.<sup>18</sup> The Intego database comprises data extracted from electronic health records (EHR) of general practitioners (GPs), all using the medical software programme Medidoc (Corilus NV, Aalter, Belgium).<sup>19</sup> Systematic collection of data started in 1994. In 2015, 111 GPs of 48 practices evenly spread throughout Flanders, collaborated in the Intego project. GPs applied for inclusion in the registry. Before acceptance of their data, registration performance was audited using a number of algorithms that compared their results with those of all other applicants. Only the data of the practices with an optimal registration performance were included in the database. The design, selection process, quality control procedures and comparability with other (inter)national registration networks were described in detail previously.<sup>18</sup> The Intego GPs prospectively and routinely registered all new diagnoses using computer-generated keywords internally linked to codes together with new drug prescriptions, as well as laboratory test results, some background information (including gender and year of birth) and some biomedical parameters (i.e. blood pressure, height, weight, smoking status and mortality). With specially framed extraction software, new data were encrypted and collected from the GPs' personal computers and entered into a central database. Registered data were continuously updated and historically accumulated for each patient. New diagnoses were classified according to a detailed thesaurus and automatically linked to the International Classification of Primary Care (ICPC-2) and International Statistical Classification of Diseases and Related Health Problems 10th Revision (ICD-10).<sup>20</sup> Drugs were classified according to the WHO's Anatomical Therapeutic Chemical (ATC) classification system.<sup>21</sup>

### Study population

For the present study, data over a 20-year time interval from 1 January 1996 to 31 December 2015 were used. Since Intego is an open registry, the amount of unique patients changes every year. The yearly contact group (YCG), defined as the number of unique patients who consult their GP in a given year, was used to describe the population at risk (denominator) in this study.<sup>22</sup> Throughout the study period, 79 GP practices provided their data, with 72% contributing for 15 or more years (see supplementary file

1  
2  
3 1). This study was reported in accordance with the RECORD checklist specific to observational studies  
4 using routinely collected health data.<sup>23</sup>  
5  
6

## 7 Measures

### 8 Data on prevalence and incidence

9  
10 Patients with knee OA were identified based on an ICPC-2 coded diagnosis in their EHR. The  
11 prevalence of a population is the proportion of the population with the disease at a specified time. Unlike  
12 incidence rates, which focus on new events, prevalence focuses on existing states. Because of the design  
13 of Intego (no episode registration and no recording of cure), prevalence rates could only be calculated  
14 on incurable chronic diseases, such as knee OA.<sup>18</sup> The incidence in Intego is calculated as the number  
15 of new cases of disease divided by the person-time magnitude. Calculating disease prevalence and  
16 incidence requires both a numerator (number of events or persons with a disease) and a matching  
17 denominator (the 'population at risk' being studied). Determining primary care practice denominators  
18 is challenging.<sup>24</sup> In this study, the YCG was used as denominator for all time trend analyses.<sup>22</sup>  
19  
20  
21  
22  
23  
24  
25

### 26 Data on multimorbidity

27 The Intego registry captures the historical diagnoses of an included patient, and not just the diagnoses  
28 made in the years the data were sent to the repository. This means that all information on comorbid  
29 diseases is integrated at the time of patient's inclusion. There are several instruments available to  
30 calculate multimorbidity, for example, the Carlson Index, the Cumulative Illness Rating Scale, the Index  
31 of Coexistent Diseases and the Kaplan Index.<sup>25-28</sup> For this study, the disease count was calculated for all  
32 incident cases with knee OA (i.e. at the time when knee OA was registered as a diagnosis). For this  
33 disease count, a list of chronic diseases based on the paper by Knottnerus et al was used.<sup>29</sup> For the  
34 presence of chronic kidney disease (CKD), the glomerular filtration rate (GFR) was based on the closest  
35 creatinine measurement in the two years before or after presentation with knee OA diagnosis  
36 (Supplementary file 2: ICPC codes for diagnosis and multimorbidity).  
37  
38  
39  
40  
41  
42  
43

### 44 Data on drug prescriptions

45 The prescription of medication for knee OA, including acetaminophen, oral and topical anti-  
46 inflammatory drugs, cox-2 selective anti-inflammatory drugs, weak and strong opioids, parenteral  
47 glucocorticoids, parenteral hyaluronic acid and glucosamine was extracted from Intego for all prevalent  
48 cases with knee OA (Supplementary file 3: used ACT codes). Prescription of medication was considered  
49 positive if it was prescribed at least once a year.  
50  
51  
52  
53

### 54 Statistical analysis

55 Descriptive statistics, with frequency distribution and percentages, were used to measure the prevalence  
56 (/100 patients) and incidence (/1000 patient years at risk) of patients with knee OA. Data were stratified  
57 by gender and ten-year age cohorts, starting from 25 with 85 years and older as the last cohort. The rates  
58  
59  
60

1  
2  
3 were age-standardized by taking the Flemish population of the year 1996 as reference population.<sup>30</sup>  
4 Additionally, possible time trends were analysed in the age-standardized cohorts with joinpoint  
5 regression analysis.<sup>31</sup> Joinpoint analysis identifies the best-fitting point, where a statistically significant  
6 change (called the “joinpoint”) occurs, and determines the trends between joinpoints. Joinpoint  
7 regression allows us to identify the time point(s) of follow-up at which trends significantly change.<sup>32</sup> A  
8 minimum number of three observations from a joinpoint to either end of the data, and a minimum  
9 number of four observations between two joinpoints were required.<sup>33</sup> The annual percentage change  
10 (APC) is proposed to summarize and compare the rates of changes between successive change points.<sup>34</sup>  
11 In the final model, the joinpoint analysis also provides an average annual percentage change (AAPC) as  
12 an average of APC estimates.<sup>34</sup> This means that trends over a specific period were described by the  
13 annual percent change (APC), while trends over the whole 1996–2015 period were summarised using  
14 the average annual percent change (AAPC). Analysis was performed with the Joinpoint Regression  
15 Program (version 3.5.3, released in May 2013 and available at <http://surveillance.cancer.gov/joinpoint>).  
16 This program starts with the minimum number of joinpoint (e.g. zero joinpoints, which is a straight line)  
17 and tests whether more joinpoints are statistically significant and must be added to the model. This  
18 enables the user to test that an apparent change in trend is statistically significant.

19 Trends in the multimorbidity profile for incident cases with knee OA were explored over four time  
20 intervals of five years (1996-2000, 2001-2005, 2006-2010 and 2011-2015) by the Cochran-Armitage  
21 test and the Jonckheere-Terpstra test. The Cochran-Armitage test for trend analysis is a modified  
22 Pearson’s chi-square test to assess the association between binary and ordinal categories (e.g. between  
23 multimorbidities and time intervals). The Jonckheere-Terpstra trend test was used to analyse trends for  
24 continuous variables (e.g. between age and time intervals).<sup>35</sup>

25 Over the same 20-year time period, trends in drug prescriptions for prevalent cases with knee OA were  
26 analyzed using joinpoint regression analysis, as described above. Two-sided p-values less than 0.05  
27 were considered to indicate statistical significance. Analyses were performed using R Software Version  
28 3.3.2 (Free Software Foundation Inc., Boston, MA, USA).

### 29 Patient involvement

30 No patients were involved in defining the research question or the outcome measures, nor were they  
31 involved in the design and implementation of the study. There are no plans to involve patients in the  
32 dissemination of the results.  
33  
34  
35  
36  
37  
38  
39  
40  
41  
42  
43  
44  
45  
46  
47  
48  
49  
50  
51  
52  
53  
54  
55  
56  
57  
58  
59  
60

## Results

### Demographic characteristics and trends in the prevalence and incidence of patients with knee osteoarthritis (1996-2015)

Between 1 January 1996 and 31 December 2015, the Intego database included data on 440,140 unique patients. During the study period, the YCG varied between 81,763 and 151,971 people (see supplementary file 4 for the exact number per year). Table 1 shows the demographic characteristics of the patients with knee OA by gender and age cohorts. The age-standardized prevalence of knee OA increased by 79% from 1.99% in 1996 to 3.56% in 2015 (AAPC= 2.5, 95%CI 2.2-2.9, Figure 1 and supplementary file 5). Women have a higher prevalence than men do, but over the 20 years of the study men have a higher relative increase in prevalence (AAPC= 3.1, 95%CI 2.7-3.5 for men versus AAPC= 2.4, 95%CI 2.0-2.7 for women). Figure 2 presents the observed and modeled long-term time trends in prevalence by gender. The age-standardized incidence of patients with knee OA remained stable with 4.23‰ in 1996 and 3.75‰ in 2015 (AAPC=-0.5, 95%CI -1.4-0.5), but showed a positive trend between 2006 and 2015 from 3.05‰ to 3.75‰, respectively (APC= 1.9, 95%CI 0.4-3.5) (Figure 3). Between 2006 and 2015, this positive trend was higher for men (APC= 2.5, 95%CI 0.5-4.5) than for women (APC= 1.9, 95%CI 0.4-3.5) (Figure 3).

### Trends in multimorbidity in newly diagnosed patients with knee osteoarthritis (1996-2015)

In the 20-year study period, the mean age at diagnosis of knee OA remained stable ( $p=0.384$ ) with 55.3 years in 1996 and 56.9 years in 2015, respectively, while a non-significant decline was found in the proportion of women in this period (65% to 62%,  $p=0.052$ ). Additionally, the disease burden was defined by calculating the mean disease count of patients with knee OA.<sup>29</sup> This mean disease count showed a significant increase in the study period ranging from 1.6 to 2.3 ( $p<0.001$ ), meaning that the multimorbidity of patients with knee OA increased. In this study, the following other diseases increased significantly: the proportions of patients with diabetes (6% to 15%,  $p<0.001$ ), cardiovascular events (21% to 27%,  $p<0.001$ ), depression (9% to 13%,  $p=0.009$ ) and obesity (5% to 8%,  $p<0.001$ ). Hypertension, gastro-intestinal ulcer and renal failure remained stable. Additionally, we noted that the proportion of knee OA patients with cancer (2% to 3%,  $p<0.001$ ), asthma (8% to 17%,  $p<0.001$ ) and substance abuse (0% to 2%,  $p<0.001$ ) increased significantly during the study period, while the proportion with osteoporosis remained stable (Table 2).

### Trends in prescriptions for patients with knee osteoarthritis (1996-2015)

The prescription of acetaminophen (AAPC= 6.7, 95%CI 5.6-7.7), weak opioids (AAPC= 4.0, 95%CI 0.9-7.3) and glucosamine (AAPC= 8.6, 95%CI 2.4-15.1) for patients with knee OA increased during the study period (Table 3). The prevalence of patients with knee OA who were prescribed acetaminophen

1  
2  
3 was lower than those with oral NSAIDs (19.2% versus 29.4% in 2015; 5.3% versus 28.4% in 1996).  
4 The prescription of oral, topical and cox-2 selective NSAIDs remained stable for both genders during  
5 the study period. The use of strong opioids showed a strong increase between 1996 and 2003 (AAPC=  
6 9.0, 95%CI 2.5-16), but then decreased slightly in the period from 2003 to 2015 (AAPC=  
7 -2.0, 95%CI  
8 3.7 to -0.3).  
9  
10

## 11 Discussion

12  
13  
14 This study presents estimates of knee OA prevalence and incidence based on a large morbidity  
15 registration network for general practice in Belgium. During the 20-year study period, the age-  
16 standardized prevalence of knee OA significantly increased while the age-standardized incidence rate  
17 remained stable. During the study period, patients with knee OA experienced higher multimorbidity, as  
18 shown by almost a doubling of the disease count. Oral NSAIDs were most frequently prescribed for the  
19 prevalent patients with knee OA, while prescription of acetaminophen, weak opioids and glucosamine  
20 showed an overall positive trend.  
21  
22  
23  
24  
25

26 This study shows that the prevalence rate of knee OA significantly increased even after standardization  
27 of the study population. General practice morbidity registration networks in other European countries  
28 show similar rates for knee OA: in the Netherlands, an overall prevalence of 3.4% and incidence of  
29 3.2‰ was registered in 2016.<sup>36</sup> In our study, we found similar rates with 3.56% and 3.75‰ respectively  
30 for the year 2015. In the UK, the estimated proportion of people who sought treatment for knee OA is  
31 high: 18% of the population aged 45 and over consulted their GP for knee OA.<sup>37</sup> The latter study also  
32 found that OA is the most common musculoskeletal condition in older people and that just over half of  
33 all patients consulting their GP about OA have knee OA. In our study, we found a consultation  
34 prevalence of 21% for the same reference year (2010) and age cohorts. In the near future, the number of  
35 people with knee OA is expected to rise considerably because of an aging population and obesity  
36 trends.<sup>38</sup> Nevertheless, the increasing prevalence of knee OA in general practice registration could also  
37 be attributed to other factors, for example: better access to general practice, more awareness of the public  
38 of preventive medicine, better diagnostics, better registration and higher demands and expectations of  
39 older people to remain physically active. Future qualitative research with different stakeholders could  
40 assess these possible explanations.  
41  
42  
43  
44  
45  
46  
47  
48  
49

50 Osteoarthritis is one of the diseases with the highest rate of multimorbidity, with reported rates of 68%  
51 to 85%.<sup>39 40</sup> Coexisting disorders may worsen pain and bring additional impairments, which necessitate  
52 adaptations to the conservative management of knee OA.<sup>14 41</sup> In our study, knee OA was also strongly  
53 associated with the following multimorbidities: asthma, cancer, depression and substance abuse. The  
54 substantial contribution of OA to multimorbidity and frailty should be recognized, further investigated,  
55 and needs extra attention in general practice management of long-term conditions.  
56  
57  
58  
59  
60

1  
2  
3 Pharmacological management of knee OA in general practice is dominated both by acetaminophen and  
4 by NSAIDs, as they are both recommended in evidence-based guidelines.<sup>5 7-9</sup> In Intego we look at the  
5 GP's prescription and not the actual drug use by the patient. Although the review by Machado et al.  
6 suggested that acetaminophen has little clinical benefit in OA, guidelines recommend starting with  
7 acetaminophen, because the adverse side effect profile of NSAIDs.<sup>42</sup> In our study, NSAIDs were the  
8 most frequently prescribed pain drug for prevalent patients with knee OA. Verkleij et al. observed the  
9 effects of medication on 104 patients with knee OA in general practice. They demonstrated no  
10 significant difference regarding knee pain and knee function between patients taking diclofenac or  
11 acetaminophen.<sup>43</sup> Furthermore, the discrepancy between drug prescription by the professional and drug  
12 use by the patient can be accumulated by the over the counter availability of acetaminophen and some  
13 oral NSAID in Belgium. Over the counter availability, could be considered as part of self-care to reduce  
14 the burden on health care systems and increase people's choice to take informed treatment decisions,  
15 but the medical outcome resulting from therapeutic options bypassing the physician prescription stays a  
16 major issue.<sup>44</sup> If acetaminophen should remain the 'first-line' pharmacological treatment for patients  
17 with a new episode, the effects of acetaminophen and the role in patients with multimorbidity should be  
18 further investigated.<sup>45</sup>

## 29 Strengths and limitations

31 The major strengths of this study are the long-term follow-up data of a practice-based morbidity  
32 registration network in general practice. Intego covers more than 2% of the Flemish population,  
33 representative in terms of age and gender.<sup>18</sup> Deckers et al. updated an inventory of primary care  
34 surveillance networks in Europa and formulated minimal standard criteria for these networks.<sup>46</sup> When  
35 fulfilling identical minimal criteria networks can provide comparable estimates of morbidity, ultimately  
36 leading to improved national and European surveillance. For continuous surveillance networks, they  
37 advise that a sufficient sample size is approximately 1% of the population, which will allow the study  
38 of common diseases.<sup>46</sup> Longitudinal data in registry-based studies are used to track the natural history  
39 of diseases over time and enable us to perform time-to-event analyses. In addition, general practices  
40 have to pass three quality criteria before being accepted as participants in Intego, what results in a  
41 reliable morbidity database.<sup>18</sup> Important attributes of most patient registries are their large sample size  
42 and data variability.<sup>47</sup> A few limitations must also be considered. Lack of data verification is a common  
43 problem in registry-based studies with longitudinal data of large sample size. In Intego, the lack of data  
44 verification and misclassification is minimalised because new diagnoses are automatically linked to  
45 ICPC-2 and ICD-10 codes with a detailed thesaurus, individual patients are followed over time and their  
46 history is taken into account. The change for misclassification for knee OA was higher in younger age  
47 cohorts. If diagnoses are not mutually exclusive, then they count for one. Secondly, we are aware that  
48 accurate coding is always a risk for possible underdiagnosis. The difference between early-onset knee  
49 OA and chronic, established knee OA can not be established with the ICPC codes. Standardized coding



1  
2  
3 for OA should be adopted in general practice to accurately describe the extent of the condition and to  
4 maximize the conservative management options to improve quality of life. Thirdly, there is no obligation  
5 for patients to be registered with a particular GP in Belgium. Therefore, it can be difficult to define ‘the  
6 population at risk’ for epidemiological studies in general practice. In Intego, the YCG was used as  
7 denominator for all trend analyses. Importantly, mortality data are lacking in Intego. Therefore, patients  
8 in the incidence analysis are considered at risk until the diagnosis or until December 31 of any specific  
9 year to compensate for possible overestimation in this registry-based study. Furthermore, to calculate  
10 the total prevalence and incidence rates, we used the total YCG as the denominator. Since age is an  
11 important risk factor to develop knee OA, younger unaffected individuals are probably overrepresented  
12 in the total population. This could result in an underestimation of the total prevalence and incidence  
13 rates. Therefore, we also provide these rates for all age cohorts in tables and supplementary files. Finally,  
14 obesity and smoking status could not be reliably assessed from the Intego database, because of  
15 insufficient registration in the patient files. To date, the information on socioeconomic status on patient  
16 level in the Intego register can not yet be extracted for data-analysis. This information is available on  
17 practice level and based on the postal code. However, since GP practices in Flanders often take care of  
18 patients living in neighboring municipalities and people living within a specific postal code can have a  
19 different socioeconomic status, we in general do not use this information in our analyses. Quality  
20 improvement initiatives should make GPs more aware of the necessity of properly recording up-to-date  
21 patient variables, such as BMI, in the EHR because of their growing importance in patient-tailored  
22 management strategies. Patient portals and remote access to their own medical health record are future  
23 initiatives, where the patient could play a more central role to help the GP in keeping these parameters  
24 more up-to-date by shared responsibility.<sup>48</sup>

## 39 Conclusion and recommendations

40 In conclusion, increased prevalence, multimorbidity, and number of drug prescriptions, together with  
41 the young age at incidence, confirm the high burden of knee OA. Our registry-based study represents  
42 knee OA diagnoses at a time it becomes a health issue for patients. Professionals face more difficulties  
43 in their conservative management options due to rising multimorbidity. In future, these health trends  
44 can be used to prioritize initiatives for improvement in care.

## 49 Acknowledgements

50 The authors would like to thank all the participating general practitioners.

## 54 References

- 55 1. Murray CJ, Vos T, Lozano R, et al. Disability-adjusted life years (DALYs) for 291 diseases and injuries  
56 in 21 regions, 1990-2010: a systematic analysis for the Global Burden of Disease Study 2010.  
57 *Lancet* 2012;380(9859):2197-223. doi: 10.1016/S0140-6736(12)61689-4  
58  
59  
60

2. Vos T, Flaxman AD, Naghavi M, et al. Years lived with disability (YLDs) for 1160 sequelae of 289 diseases and injuries 1990-2010: a systematic analysis for the Global Burden of Disease Study 2010. *Lancet* 2012;380(9859):2163-96. doi: 10.1016/S0140-6736(12)61729-2
3. Litwic A, Edwards MH, Dennison EM, et al. Epidemiology and burden of osteoarthritis. *Br Med Bull* 2013;105:185-99. doi: 10.1093/bmb/lds038
4. Bedson J, Jordan K, Croft P. The prevalence and history of knee osteoarthritis in general practice: a case-control study. *Fam Pract* 2005;22(1):103-8. doi: 10.1093/fampra/cmh700 [published Online First: 2005/01/11]
5. McAlindon TE, Bannuru RR, Sullivan MC, et al. OARSI guidelines for the non-surgical management of knee osteoarthritis. *Osteoarthritis Cartilage* 2014;22(3):363-88. doi: 10.1016/j.joca.2014.01.003 [published Online First: 2014/01/28]
6. National Institute for Health and Care Excellence (NICE): Osteoarthritis: care and management (quality standard 87): <http://guidance.nice.org.uk/qs87>. Accessed October 22, 2019.
7. Fernandes L, Hagen KB, Bijlsma JW, et al. EULAR recommendations for the non-pharmacological core management of hip and knee osteoarthritis. *Ann Rheum Dis* 2013;72(7):1125-35. doi: 10.1136/annrheumdis-2012-202745 [published Online First: 2013/04/19]
8. Hochberg MC, Altman RD, April KT, et al. American College of Rheumatology 2012 recommendations for the use of nonpharmacologic and pharmacologic therapies in osteoarthritis of the hand, hip, and knee. *Arthritis Care Res (Hoboken)* 2012;64(4):465-74. [published Online First: 2012/05/09]
9. Kingsbury SR, Gross HJ, Isherwood G, et al. Osteoarthritis in Europe: impact on health status, work productivity and use of pharmacotherapies in five European countries. *Rheumatology (Oxford)* 2014;53(5):937-47. doi: 10.1093/rheumatology/ket463 [published Online First: 2014/02/04]
10. Harding PA, Holland AE, Hinman RS, et al. Physical activity perceptions and beliefs following total hip and knee arthroplasty: a qualitative study. *Physiother Theory Pract* 2015;31(2):107-13. doi: 10.3109/09593985.2014.959581 [published Online First: 2014/12/17]
11. de Rooij M, Steultjens MPM, Avezaat E, et al. Restrictions and contraindications for exercise therapy in patients with hip and knee osteoarthritis and comorbidity. *Physical Therapy Reviews* 2013;18(2):101-11. doi: 10.1179/1743288X12Y.0000000056
12. Kadam UT, Jordan K, Croft PR. Clinical comorbidity in patients with osteoarthritis: a case-control study of general practice consultants in England and Wales. *Ann Rheum Dis* 2004;63(4):408-14. doi: 10.1136/ard.2003.007526 [published Online First: 2004/03/17]
13. van Oostrom SH, Picavet HS, de Bruin SR, et al. Multimorbidity of chronic diseases and health care utilization in general practice. *BMC Fam Pract* 2014;15:61. doi: 10.1186/1471-2296-15-61 [published Online First: 2014/04/09]
14. Reeuwijk KG, de Rooij M, van Dijk GM, et al. Osteoarthritis of the hip or knee: which coexisting disorders are disabling? *Clin Rheumatol* 2010;29(7):739-47. doi: 10.1007/s10067-010-1392-8 [published Online First: 2010/02/24]
15. Freid VM, Bernstein AB, Bush MA. Multiple chronic conditions among adults aged 45 and over: trends over the past 10 years. *NCHS Data Brief* 2012(100):1-8. [published Online First: 2012/10/30]
16. van den Akker M, Vaes B, Goderis G, et al. Trends in multimorbidity and polypharmacy in the Flemish-Belgian population between 2000 and 2015. *PLoS One* 2019;14(2):e0212046. doi: 10.1371/journal.pone.0212046 [published Online First: 2019/02/13]
17. Uijen AA, van de Lisdonk EH. Multimorbidity in primary care: prevalence and trend over the last 20 years. *Eur J Gen Pract* 2008;14 Suppl 1:28-32. doi: 10.1080/13814780802436093 [published Online First: 2008/10/31]
18. Truyers C, Goderis G, Dewitte H, et al. The Intego database: background, methods and basic results of a Flemish general practice-based continuous morbidity registration project. *BMC Med Inform Decis Mak* 2014;14:48. doi: 10.1186/1472-6947-14-48 [published Online First: 2014/06/08]

19. Vanbeselaere V, Truyers C, Elli S, et al. Association between atrial fibrillation, anticoagulation, risk of cerebrovascular events and multimorbidity in general practice: a registry-based study. *BMC Cardiovasc Disord* 2016;16:61. doi: 10.1186/s12872-016-0235-1 [published Online First: 2016/03/30]
20. Okkes IM, Becker HW, Bernstein RM, et al. The March 2002 update of the electronic version of ICPC-2. A step forward to the use of ICD-10 as a nomenclature and a terminology for ICPC-2. *Fam Pract* 2002;19(5):543-6. [published Online First: 2002/10/03]
21. WHO Collaborating Centre for Drug Statistics Methodology: ATC/DDD Index 2010. Available at [http://www.whocc.no/atc\\_ddd\\_index](http://www.whocc.no/atc_ddd_index). Accessed October 19, 2019.
22. Bartholomeeusen S, Kim CY, Mertens R, et al. The denominator in general practice, a new approach from the Intego database. *Fam Pract* 2005;22(4):442-7. doi: 10.1093/fampra/cmi054 [published Online First: 2005/06/21]
23. Benchimol EI, Smeeth L, Guttman A, et al. The REporting of studies Conducted using Observational Routinely-collected health Data (RECORD) statement. *PLoS Med* 2015;12(10):e1001885. doi: 10.1371/journal.pmed.1001885 [published Online First: 2015/10/07]
24. Greiver M, Williamson T, Bennett TL, et al. Developing a method to estimate practice denominators for a national Canadian electronic medical record database. *Fam Pract* 2013;30(3):347-54. doi: 10.1093/fampra/cms083 [published Online First: 2013/01/12]
25. Charlson ME, Pompei P, Ales KL, et al. A new method of classifying prognostic comorbidity in longitudinal studies: development and validation. *J Chronic Dis* 1987;40(5):373-83. [published Online First: 1987/01/01]
26. Shah AN, Vail TP, Taylor D, et al. Comorbid illness affects hospital costs related to hip arthroplasty: quantification of health status and implications for fair reimbursement and surgeon comparisons. *J Arthroplasty* 2004;19(6):700-5. [published Online First: 2004/09/03]
27. Linn BS, Linn MW, Gurel L. Cumulative illness rating scale. *J Am Geriatr Soc* 1968;16(5):622-6. doi: 10.1111/j.1532-5415.1968.tb02103.x [published Online First: 1968/05/01]
28. Piccirillo JF, Lacy PD, Basu A, et al. Development of a new head and neck cancer-specific comorbidity index. *Arch Otolaryngol Head Neck Surg* 2002;128(10):1172-9. doi: 10.1001/archotol.128.10.1172 [published Online First: 2002/10/09]
29. Knottnerus JA, Metsemakers J, Hoppener P, et al. Chronic illness in the community and the concept of 'social prevalence'. *Fam Pract* 1992;9(1):15-21. [published Online First: 1992/03/01]
30. Truyens C, Elli S, Goderis G, et al. [Dutch: 20 year General Practice in Flanders (1994-2013)]. Leuven: Acco, 2015. ISBN978-94-6292-129-0.
31. Kim HJ, Fay MP, Feuer EJ, et al. Permutation tests for joinpoint regression with applications to cancer rates. *Stat Med* 2000;19(3):335-51. [published Online First: 2000/01/29]
32. Rea F, Pagan E, Compagnoni M, et al. Joinpoint regression analysis with time-on-study as time-scale. Application to three Italian population-based cohort studies. *Epidemiology Biostatistics and Public Health* 2017;14(3):e12616:1-8.
33. Yu B, Barrett MJ, Kim H-J, et al. Estimating joinpoints in continuous time scale for multiple change-point models. *Computational Statistics & Data Analysis* 2007;51(5):2420-27. doi: <https://doi.org/10.1016/j.csda.2006.07.044>
34. Clegg LX, Hankey BF, Tiwari R, et al. Estimating average annual per cent change in trend analysis. *Stat Med* 2009;28(29):3670-82. doi: 10.1002/sim.3733 [published Online First: 2009/10/27]
35. Alan A. Categorical data analysis. 2nd ed: Wiley 2002.
36. Nivel database for primary care morbidity registration in the Netherlands. Available at <https://www.nivel.nl/nl/>. Accessed October 19, 2019.
37. Osteoarthritis in general practice: data and perspectives. 2013. Available at [www.arthritisresearchuk.org](http://www.arthritisresearchuk.org). Accessed October 19, 2019.
38. Cross M, Smith E, Hoy D, et al. The global burden of hip and knee osteoarthritis: estimates from the global burden of disease 2010 study. *Ann Rheum Dis* 2014;73(7):1323-30. doi: 10.1136/annrheumdis-2013-204763 [published Online First: 2014/02/21]

- 1  
2  
3 39. de Rooij M, van der Leeden M, Cheung J, et al. Efficacy of Tailored Exercise Therapy on Physical  
4 Functioning in Patients With Knee Osteoarthritis and Comorbidity: A Randomized Controlled  
5 Trial. *Arthritis Care Res (Hoboken)* 2017;69(6):807-16. doi: 10.1002/acr.23013 [published  
6 Online First: 2016/08/27]  
7  
8 40. van Dijk GM, Veenhof C, Schellevis F, et al. Comorbidity, limitations in activities and pain in patients  
9 with osteoarthritis of the hip or knee. *BMC Musculoskelet Disord* 2008;9:95. doi:  
10 10.1186/1471-2474-9-95 [published Online First: 2008/06/28]  
11  
12 41. Calders P, Van Ginckel A. Presence of comorbidities and prognosis of clinical symptoms in knee  
13 and/or hip osteoarthritis: A systematic review and meta-analysis. *Semin Arthritis Rheum*  
14 2018;47(6):805-13. doi: 10.1016/j.semarthrit.2017.10.016 [published Online First:  
15 2017/11/22]  
16  
17 42. Machado GC, Maher CG, Ferreira PH, et al. Efficacy and safety of paracetamol for spinal pain and  
18 osteoarthritis: systematic review and meta-analysis of randomised placebo controlled trials.  
19 *Bmj* 2015;350:h1225. doi: 10.1136/bmj.h1225 [published Online First: 2015/04/02]  
20  
21 43. Verkleij SP, Luijsterburg PA, Willemsen SP, et al. Effectiveness of diclofenac versus paracetamol in  
22 knee osteoarthritis: a randomised controlled trial in primary care. *Br J Gen Pract*  
23 2015;65(637):e530-7. doi: 10.3399/bjgp15X686101 [published Online First: 2015/07/28]  
24  
25 44. WHO Guidelines for the Regulatory Assessment of Medicinal Products for Use in Self-medication.  
26 WHO/EDM/QSM/00.1. 2000. Available at: <https://apps.who.int/medicinedocs>. Accessed  
27 September 11, 2019.  
28  
29 45. Conaghan PG. NSAIDs or paracetamol for short-term treatment of mild to moderate knee pain in  
30 early osteoarthritis: are they equivalent? *Evid Based Med* 2016;21(1):14. doi: 10.1136/ebmed-  
31 2015-110289 [published Online First: 2015/10/21]  
32  
33 46. Deckers JG, Paget WJ, Schellevis FG, et al. European primary care surveillance networks: their  
34 structure and operation. *Fam Pract* 2006;23(2):151-8. doi: 10.1093/fampra/cmi118 [published  
35 Online First: 2006/02/09]  
36  
37 47. Trotter JP. Patient registries: a new gold standard for "real world" research. *Ochsner J*  
38 2002;4(4):211-4. [published Online First: 2002/10/01]  
39  
40 48. Alpert JM, Krist AH, Aycock RA, et al. Designing User-Centric Patient Portals: Clinician and Patients'  
41 Uses and Gratifications. *Telemed J E Health* 2017;23(3):248-53. doi: 10.1089/tmj.2016.0096  
42 [published Online First: 2016/06/23]  
43  
44  
45  
46  
47  
48  
49  
50  
51  
52  
53  
54  
55  
56  
57  
58  
59  
60

## Footnotes

**Contributors:** PM and DS performed the analyses, and DS, PV, RH, MS, FL, BV wrote the manuscript. DS, MS and BV are responsible for the study concept, design, the recruitment of subjects and acquisition of data. All authors participated in the interpretation of the data. All authors approved the final version of the manuscript.

**Funding:** the Flemish Government (Ministry of Health and Welfare) funds Intego on a regular basis. This work would not have been possible without the collaboration of all general practitioners of the Intego network. We hereby state the independence of the researchers from the funders.

**Disclaimer:** The funders had no role in the study design, data collection and analysis, decision to publish or preparation of the manuscript

**Competing interests:** None declared.

1  
2  
3 **Ethics approval:** The Intego project was presented to the Belgian Privacy Commission (no  
4 SCSZG/13/079) and approved by the ethical review board of the Medical School of the Catholic  
5 University of Leuven (N° ML 1723). This permission completely covered the current investigation. In  
6 the Intego protocol, participating GP practices have to inform their patients that the practice participates  
7 in a morbidity registration network. Patients can choose to opt out for the possibility of their anonymized  
8 data extraction.  
9  
10  
11  
12

13 **Data sharing statement:** The dataset supporting the conclusions of this article is held at the University  
14 of Leuven, Belgium, and can be shared upon contacting the corresponding author.  
15  
16  
17  
18  
19  
20  
21  
22  
23  
24  
25  
26  
27  
28  
29  
30  
31  
32  
33  
34  
35  
36  
37  
38  
39  
40  
41  
42  
43  
44  
45  
46  
47  
48  
49  
50  
51  
52  
53  
54  
55  
56  
57  
58  
59  
60

For peer review only

## Figure legends

1. Figure 1. The standardized and non-standardized prevalence of patients with knee osteoarthritis by age cohorts in the Intego registry (1996-2015). Standardization was performed by taking the Flemish population of the year 1996 as reference population.
2. Figure 2. An overview of the observed and modeled trends in prevalence for men and women in the Intego registry (1996-2015). Observed (bullets) and modeled (trend line) age-standardized average annual percentage change (AAPC) in prevalence with 95% confidence intervals for time trends for patients with knee osteoarthritis in Intego register, 1996–2015. The AAPC is significantly different from zero at  $\alpha = 0.05$ .
3. Figure 3. The standardised and non-standardized incidence of patients with knee osteoarthritis in the Intego registry (1996-2015). Standardization was performed by taking the Flemish population of the year 1996 as reference population.

## Supplementary file list

1. Supplementary file 1. Participation of GP practices in Intego (1996-2015).
2. Supplementary file 2. ICPC codes and description of codes for the disease count.
3. Supplementary file 3. ACT coding for pharmacological agents used in the management of knee osteoarthritis.
4. Supplementary file 4. Number of people in the yearly contact group (by gender and age cohort) in Intego (1996-2015).
5. Supplementary file 5. Demographic characteristics of patients with knee osteoarthritis in Intego (1996, 2005 and 2015).

Table 1. Demographic characteristics and trends in prevalence and incidence of patients with knee osteoarthritis in the Intego registry (1996-2015).

|                                  | Year<br>1996* | Year<br>2015* | Overall<br>trend***       | Trend 1               |                            | Trend 2       |                          | Trend<br>3 |                 |
|----------------------------------|---------------|---------------|---------------------------|-----------------------|----------------------------|---------------|--------------------------|------------|-----------------|
|                                  | %             | %             | AAPC<br>[95% CI]          | Years                 | APC<br>[95% CI]            | Years         | APC<br>[95% CI]          | Years      | APC<br>[95% CI] |
| <b>Prevalence</b>                |               |               |                           |                       |                            |               |                          |            |                 |
| <b>Total</b>                     | 1.99          | 3.56          | <b>2.5</b><br>[2.2;2.9]   | 1996-<br>2015         | <b>2.5</b><br>[2.2;2.9]    |               |                          |            |                 |
| <b>Men</b>                       | 1.32          | 2.59          | <b>3.1</b><br>[2.7;3.5]   | 1996-<br>2015         | <b>3.1</b><br>[2.7;3.5]    |               |                          |            |                 |
| <b>Women</b>                     | 2.64          | 4.55          | <b>2.4</b><br>[2.0;2.7]   | 1996-<br>2015         | <b>2.4</b><br>[2.0;2.7]    |               |                          |            |                 |
| <b>Prevalence by age group**</b> |               |               |                           |                       |                            |               |                          |            |                 |
| <b>25-34</b>                     | 0.68          | 1.82          | <b>4.7</b><br>[3.7;5.6]   | 1996-<br>2007         | <b>7.7</b><br>[6.4;9.1]    | 2007-<br>2015 | <b>0.6</b><br>[-0.9;2.1] |            |                 |
| <b>35-44</b>                     | 0.70          | 2.21          | <b>5.5</b><br>[4.3;6.7]   | 1996-<br>2011         | <b>4.5</b><br>[3.6;5.4]    | 2011-<br>2015 | <b>9.5</b><br>[4.3;15.0] |            |                 |
| <b>45-54</b>                     | 1.55          | 3.14          | <b>4.0</b><br>[3.3;4.8]   | 1996-<br>2011         | <b>3.4</b><br>[2.8;4.0]    | 2011-<br>2015 | <b>6.5</b><br>[3.2;10.0] |            |                 |
| <b>≥ 45</b>                      | 3.68          | 7.42          | <b>2.8</b><br>[2.5;3.2]   | <b>1996-<br/>2015</b> | <b>2.8</b><br>[2.5;3.2]    |               |                          |            |                 |
| <b>≥ 45 Males</b>                | 2.53          | 5.64          | <b>3.9</b><br>[3.6;4.3]   | <b>1996-<br/>2015</b> | <b>3.9</b><br>[3.6;4.3]    |               |                          |            |                 |
| <b>≥ 45 Females</b>              | 5.26          | 9.03          | <b>2.4</b><br>[2.0;2.7]   | <b>1996-<br/>2015</b> | <b>2.4</b><br>[2.0;2.7]    |               |                          |            |                 |
| <b>55-64</b>                     | 2.96          | 5.60          | <b>3.0</b><br>[2.6;3.4]   | 1996-<br>2015         | <b>3.0</b><br>[2.6;3.4]    |               |                          |            |                 |
| <b>65-74</b>                     | 6.08          | 8.97          | <b>1.7</b><br>[1.3;2.2]   | 1996-<br>2015         | <b>1.7</b><br>[1.3;2.2]    |               |                          |            |                 |
| <b>75-84</b>                     | 7.80          | 13.9          | <b>2.6</b><br>[2.0;3.2]   | 1996-<br>2007         | <b>3.6</b><br>[2.7;4.5]    | 2007-<br>2015 | <b>1.2</b><br>[0.2;2.1]  |            |                 |
| <b>≥ 85</b>                      | 6.27          | 15.0          | <b>3.0</b><br>[2.4;3.5]   | 1996-<br>2015         | <b>3.0</b><br>[2.4;3.5]    |               |                          |            |                 |
| <b>Incidence</b>                 |               |               |                           |                       |                            |               |                          |            |                 |
| <b>Total</b>                     | 0.42          | 0.38          | <b>-0.5</b><br>[-1.4;0.5] | 1996-<br>2006         | <b>-2.6</b><br>[-4.0;-1.1] | 2006-<br>2015 | <b>1.9</b><br>[0.4;3.5]  |            |                 |
| <b>Men</b>                       | 0.27          | 0.26          | <b>-0.2</b><br>[-1.4;1.1] | 1996-<br>2006         | <b>-2.5</b><br>[-4.4;-0.5] | 2006-<br>2015 | <b>2.5</b><br>[0.5;4.5]  |            |                 |



|                |      |      |            |       |                     |       |             |       |           |
|----------------|------|------|------------|-------|---------------------|-------|-------------|-------|-----------|
| <b>Women</b>   | 0.58 | 0.49 | -0.5       | 1996- | <b>-8.7</b>         | 1999- | -0.4        | 2013- | 11.8 [-   |
|                |      |      | [-2.4;1.4] | 1999  | <b>[-16.2;-0.6]</b> | 2013  | [-1.2;0.5]  | 2015  | 3.3;29.3] |
| <b>≥ 45</b>    | 0.79 | 0.69 | 0.0        | 1996- | -1.3                | 2011- | 4.7         |       |           |
|                |      |      | [-1.4;1.4] | 2011  | [-2.2;-0.3]         | 2015  | [-1.5;11.4] |       |           |
| <b>≥ 45</b>    | 0.44 | 0.51 | 0.6        | 1996- | 0.6                 |       |             |       |           |
| <b>Males</b>   |      |      | [-0.4;1.6] | 2015  | [-0.4;1.6]          |       |             |       |           |
| <b>≥ 45</b>    | 1.11 | 0.81 | -1.9       | 1996- | -11                 | 1999- | 0.0         |       |           |
| <b>Females</b> |      |      | [-3.7;0]   | 1999  | [-21.4;0.7]         | 2015  | [-0.9;-0.8] |       |           |

**Legend:**

AAPC, average annual percentage change; APC, annual percentage change; CI, confidence interval

\* These percentages are standardized for the total Flemish population.

\*\* Standardization was possible for the total population, but not for specific age cohorts.

\*\*\* Joinpoint regression modelling was used to estimate (A) APC in prevalence and incidence trends. Three possible trends were calculated during the 20-year study period.

**Statistically significant differences for (A) APC are indicated in bold.**

Table 2. Trends in multimorbidity of patients with knee osteoarthritis in the Intego registry (1996-2015).

| Variables                        | 1996-2000   | 2001-2005   | 2006-2010   | 2011-2015*  | p-value** |
|----------------------------------|-------------|-------------|-------------|-------------|-----------|
| Mean age ( $\pm$ SD)             | 55.3 (21.9) | 57.6 (20.5) | 57.8 (19.8) | 56.9 (19.8) | 0.384     |
| Women, n (%)                     | 972 (65%)   | 1234 (65%)  | 1419 (64%)  | 1412 (62%)  | 0.05224   |
| Incidence, n                     | 1503        | 1912        | 2202        | 2288        |           |
| Multimorbidity, n (%)            |             |             |             |             |           |
| Hypertension                     | 359 (24%)   | 485 (25%)   | 623 (28%)   | 593 (26%)   | 0.0756    |
| Diabetes                         | 93 (6%)     | 161 (8%)    | 252 (11%)   | 346 (15%)   | <0.001    |
| CV events                        | 323 (21%)   | 480 (25%)   | 597 (27%)   | 614 (27%)   | <0.001    |
| GI complication (ulcer)          | 28 (2%)     | 60 (3%)     | 59 (3%)     | 61 (3%)     | 0.3585    |
| Renal failure                    | 23 (2%)     | 70 (4%)     | 71 (3%)     | 66 (3%)     | 0.1025    |
| Depression                       | 141 (9%)    | 230 (12%)   | 259 (12%)   | 287 (13%)   | 0.009     |
| Obesity                          | 74 (5%)     | 101 (5%)    | 145 (7%)    | 191 (8%)    | <0.001    |
| Osteoporosis                     | 57 (4%)     | 81 (4%)     | 107 (5%)    | 103 (5%)    | 0.2303    |
| Cancer                           | 29 (2%)     | 60 (3%)     | 59 (3%)     | 61 (3%)     | <0.001    |
| Asthma                           | 125 (8%)    | 205 (11%)   | 328 (15%)   | 392 (17%)   | <0.001    |
| Substance abuse                  | 4 (0%)      | 22 (1%)     | 31 (1%)     | 48 (2%)     | <0.001    |
| Disease burden, n ( $\pm$ SD)*** | 1.63 (1.81) | 1.84 (2.00) | 2.18 (2.20) | 2.34 (2.35) | <0.001    |

**Legend:**

Multimorbidity was measured for all incident cases with knee OA (i.e. at the time when knee OA was registered as a diagnosis).

\* Four time intervals of five years were defined to evaluate trends for all incident patients with knee osteoarthritis.

\*\* *P*-value for multimorbidity was calculated with the Cochran-Armitage trend test; *p*-value for age was calculated with the Jonckheere-Terpstra trend test.

\*\*\* The full list of diseases to calculate this mean disease burden is presented in supplementary file 2.

Table 3. Trends in medication use of patients with knee osteoarthritis in the Intego registry (1996-2015).

| Group/<br>Medication                    | Prev. in |             | Overall trend             | Trend 1                               | Trend 2                                | Trend 3 <sup>‡</sup>     |                      |
|-----------------------------------------|----------|-------------|---------------------------|---------------------------------------|----------------------------------------|--------------------------|----------------------|
|                                         | 1996     | 2015        | AAPC [95% CI]             | Years<br>APC<br>[95% CI]              | Years<br>APC<br>[95% CI]               | Years<br>APC<br>[95% CI] | APC<br>[95% CI]      |
| <b>Acetaminophen</b>                    | 5.3      | 19.2        | <b>6.7 [5.6-7.7]</b>      | 1996-2010<br><b>8.0 [6.8-9.2]</b>     | 2010-2015<br><b>3.1 [0.3;5.9]</b>      |                          |                      |
| Males                                   | 5.2      | 17.4        | <b>5.8 [4.9-6.6]</b>      |                                       |                                        |                          |                      |
| Females                                 | 5.4      | <b>20.2</b> | <b>7.0 [5.8-8.3]</b>      | 1996-2010<br><b>8.7 [7.3;10.1]</b>    | 2010-2015<br>2.7 [-0.6;6.0]            |                          |                      |
| <b>Oral NSAID<br/>(exclusion cox-2)</b> | 28.4     | 29.4        | 0.0 [-1.1;1.1]            | 1996-2002<br>-1.0 [-3.5;1.6]          | 2002-2008<br>2.4 [-0.1;5.0]            | 2008-2015                | -1.2 [-2.4;0.1]      |
| Males                                   | 28.6     | 28.8        | 0.5 [-0.2;1.2]            | 1996-2009<br><b>1.1 [0.4;1.9]</b>     | 2009-2015<br>0.5 [-0.2;1.2]            |                          |                      |
| Females                                 | 28.3     | 29.6        | 0.3 [-0.1;0.8]            |                                       |                                        |                          |                      |
| <b>Cox-2 selective<br/>NSAID</b>        | 3.0      | 2.3         | -7.7 [-36.0; 33.0]        | 2000-2004<br>-2.7 [-29.3;33.9]        | 2004-2007<br>-48.4 [-93.5; 309.5]      | 2007-2015                | 11.8 [-3.4;29.5]     |
| Males                                   | 2.2      | 1.8         | <b>-13.3 [-19.3;-6.7]</b> |                                       |                                        |                          |                      |
| Females                                 | 3.4      | 2.7         | -7.3 [-34.0;30.1]         | 2000-2004<br>-3.3 [-29.1;32.0]        | 2004-2007<br>-47.2 [-92.2; 257.6]      | 2007-2015                | 12.0 [-2.9;29.2]     |
| <b>Topical NSAID</b>                    | 7.8      | 5.9         | -1.0 [-2.4; 0.4]          | 1996-2003<br><b>-4.7 [-8.1;-1.2]</b>  | 2003-2015<br>1.2 [-0.0;2.4]            |                          |                      |
| Males                                   | 9.3      | 5.8         | -0.9 [-2.2;0.5]           |                                       |                                        |                          |                      |
| Females                                 | 7.1      | 5.9         | -0.8 [-2.3;0.7]           | 1996-2003<br><b>-4.3 [-8.0;-0.4]</b>  | 2003-2015<br>1.3 [-0.0;2.6]            |                          |                      |
| <b>Weak opioids</b>                     | 2.8      | 6.1         | <b>4.0 [0.9;7.3]</b>      | 1996-1998<br><b>36.3 [0.4;85.2]</b>   | 1998-2009<br>-0.9 [-2.3;0.5]           | 2009-2015                | <b>4.0 [1.6;6.4]</b> |
| Males                                   | 1.5      | 5.2         | <b>2.9 [1.5;4.4]</b>      |                                       |                                        |                          |                      |
| Females                                 | 3.3      | 6.7         | 2.8 [-0.0;5.7]            | 1996-2000<br><b>14.7 [1.6;29.4]</b>   | 2000-2008<br>-3.2 [-6.4;0.2]           | 2008-2015                | <b>3.5 [0.6;6.4]</b> |
| <b>Strong opioids</b>                   | 2.5      | 4.3         | 1.9 [-0.4;4.3]            | 1996-2003<br><b>9.0 [2.5;16.0]</b>    | 2003-2015<br><b>-2.0 [-3.7;-0.3]</b>   |                          |                      |
| Males                                   | 1.7      | 3.6         | -0.2 [-2.0; 1.6]          |                                       |                                        |                          |                      |
| Females                                 | 2.9      | 4.7         | <b>2.3 [0.3;4.3]</b>      | 1996-2003<br><b>10.0 [4.4;15.9]</b>   | 2003-2015<br><b>-2.0 [-3.4;-0.5]</b>   |                          |                      |
| <b>Parenteral<br/>glucocorticoids</b>   | 9.1      | 8.1         | -0.7 [-1.8;0.5]           | 1996-2005<br><b>-2.1 [-3.5;-0.7]</b>  | 2005-2012<br><b>2.7 [0.8;4.7]</b>      | 2012-2015                | -4.1 [-9.2;1.2]      |
| Males                                   | 8.1      | 8.6         | <b>0.8 [0.0;1.6]</b>      |                                       |                                        |                          |                      |
| Females                                 | 9.6      | 7.9         | <b>-1.3 [-2.6; 0.0]</b>   | 1996-2003<br><b>-3.8 [-6.0;-1.5]</b>  | 2003-2012<br><b>2.0 [0.6;3.4]</b>      | 2012-2015                | -5.1 [-10.7;0.8]     |
| <b>Glucosamine*</b>                     | 0.6      | 1.8         | <b>8.6 [2.4;15.1]</b>     | 2001-2004<br><b>64.1 [25.0;115.3]</b> | 2004-2011<br><b>-9.6 [-14.3;-4.4]</b>  | 2011-2015                | 9.8 [-0.6;21.2]      |
| Males                                   | 0.1      | 1.8         | 17.3 [-18.8; 69.5]        | 2001-2003<br>212.4 [-83.1;566.4.3]    | 2003-2015<br>-0.4 [-4.8;4.2]           |                          |                      |
| Females                                 | 0.9      | 1.8         | <b>6.8 [0.4;13.7]</b>     | 2001-2004<br><b>56.7 [18.3;107.5]</b> | 2004-2011<br><b>-10.0 [-15.3;-4.3]</b> | 2011-2015                | 8.2 [-3.6;21.4]      |

**Legend:**

AAPC, average annual percentage change; APC, annual percentage change; CI, confidence interval; Prev., prevalence

\*glucosamine: registration starts from 2001; cox-2 selective NSAID starts from 2000

**Bold:** indicates that the (A)APC is significantly different from zero at the alpha= 0.05 level

<sup>‡</sup>= three possible time trends were computed with the joinpoint regression analysis. The corresponding time cohorts and APC are mentioned in these three columns

Figure 1.

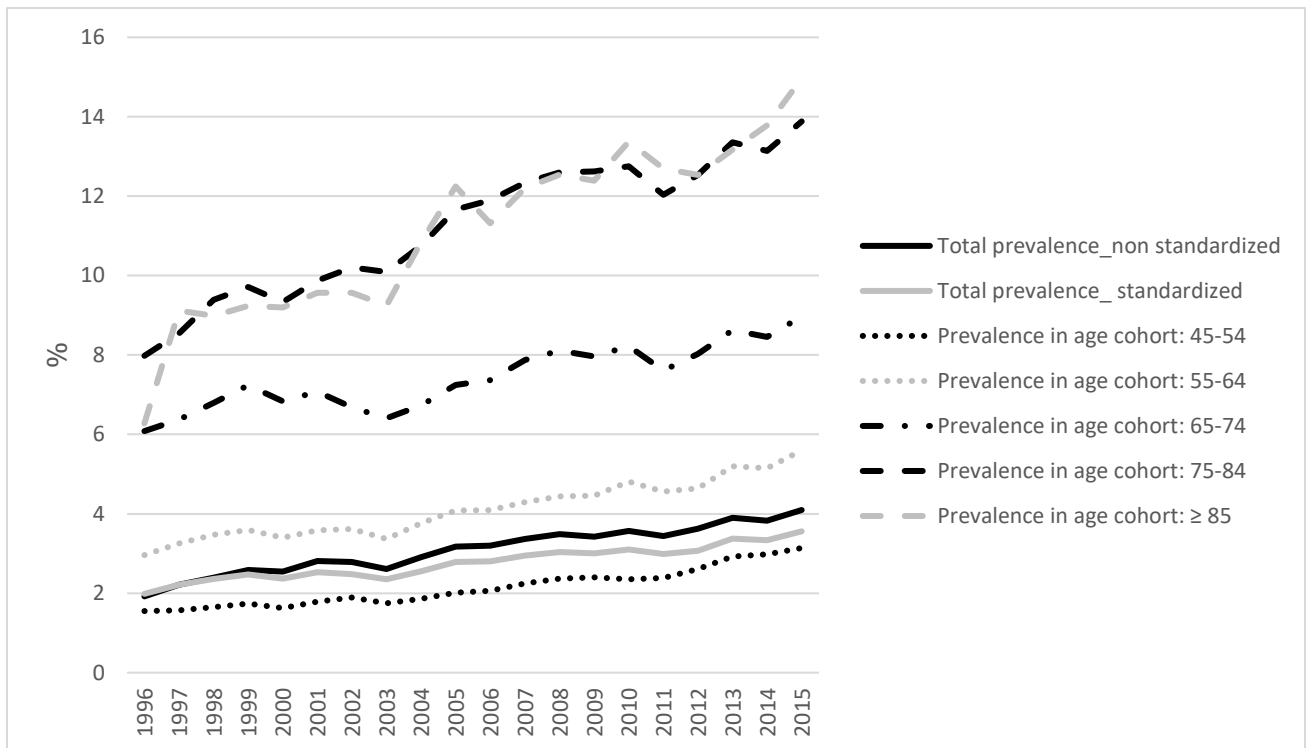

review only

Figure 2.

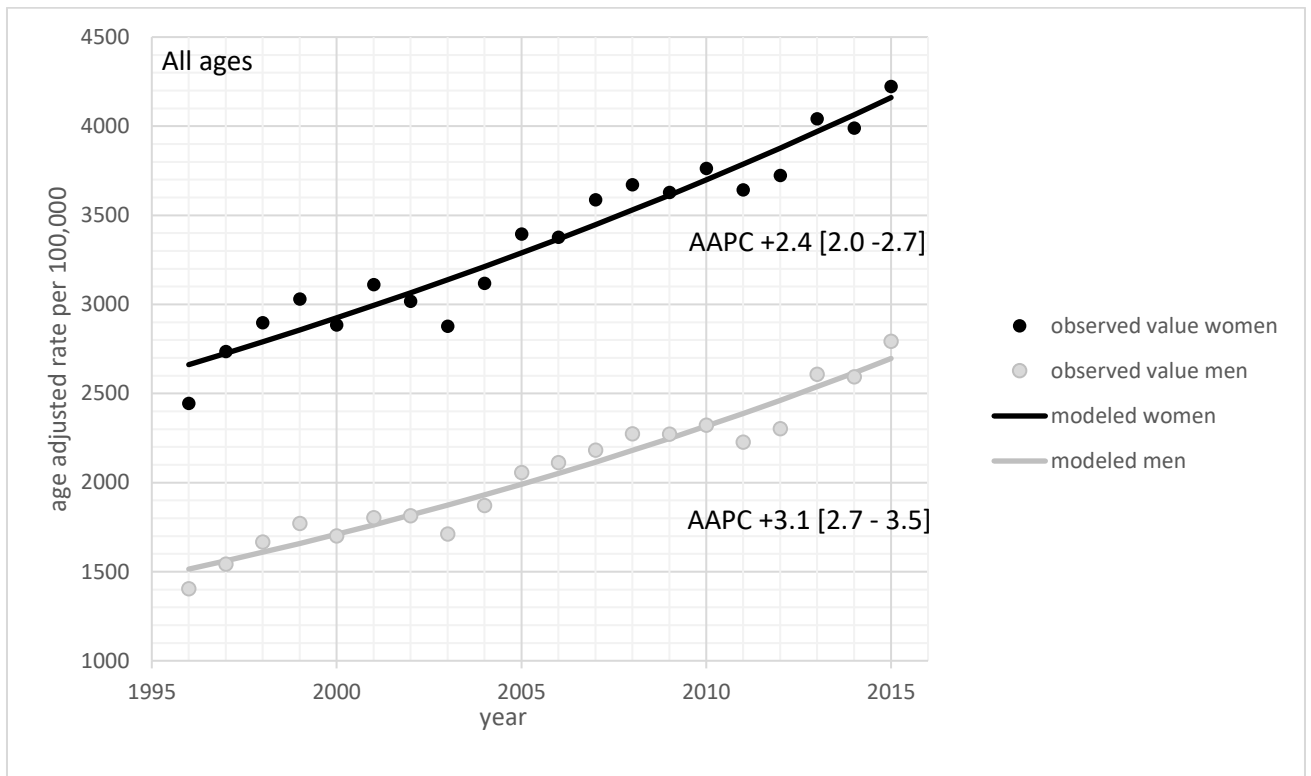

Review only

Figure 3.

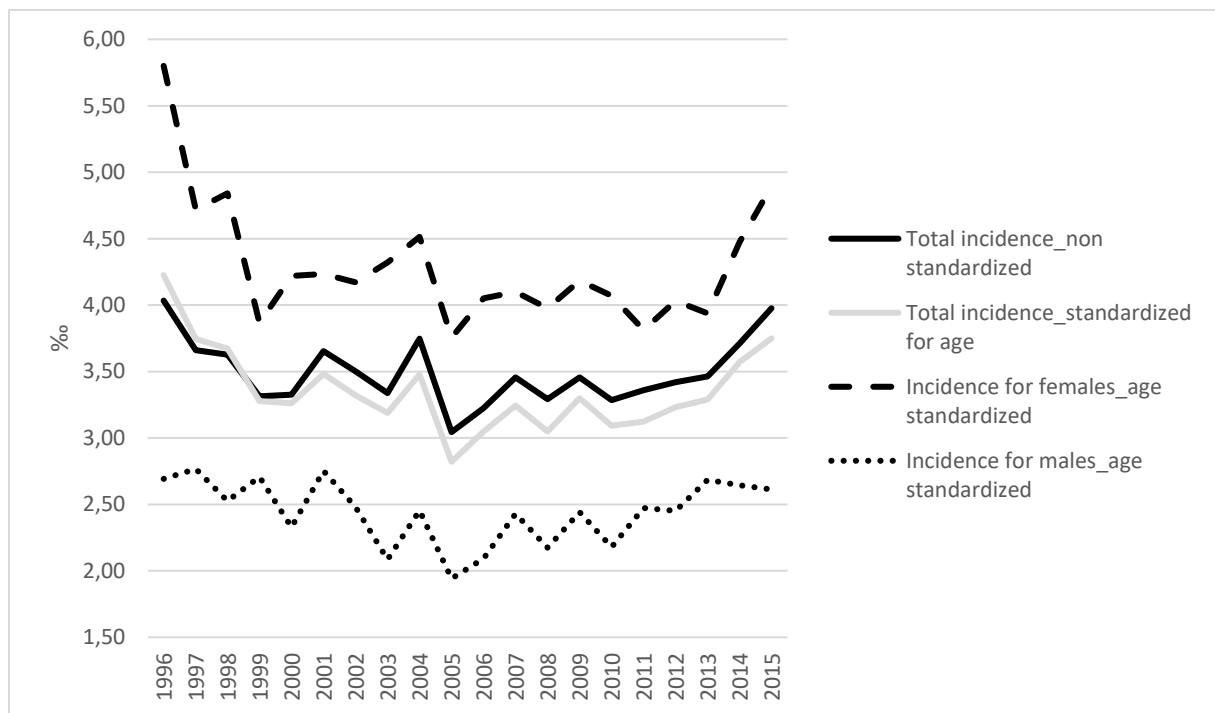

review only

### Supplementary file 1. Participation of GP practices in Intego (1996-2015)

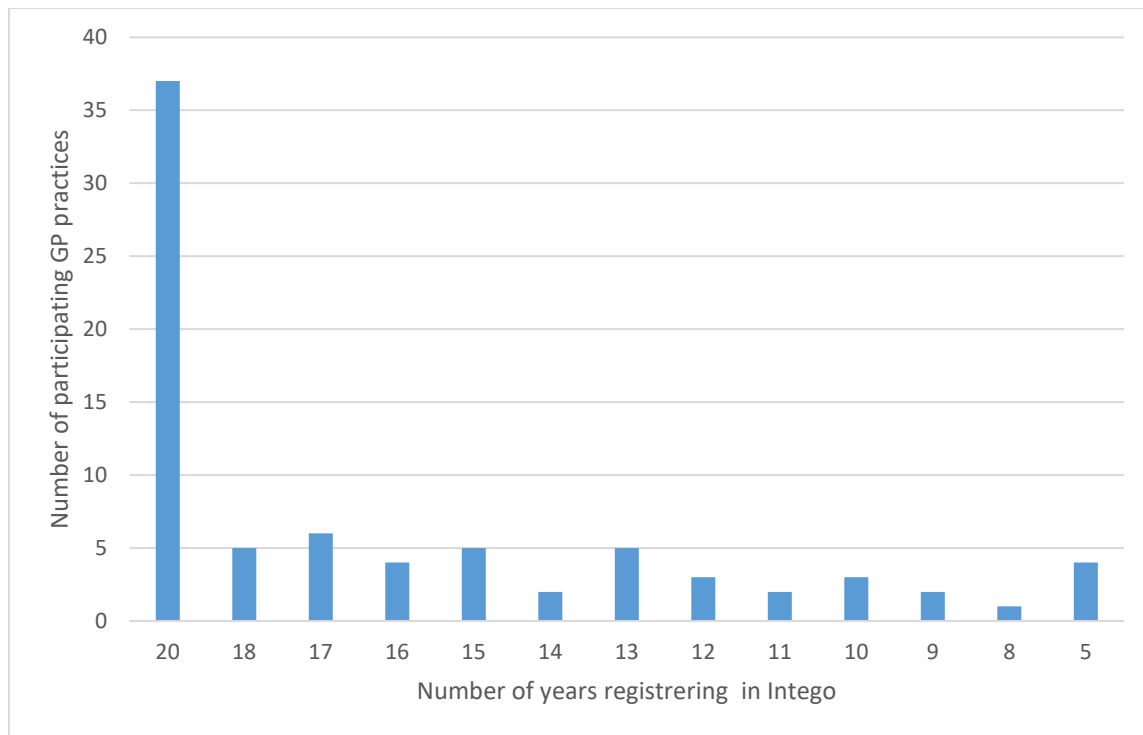

Review only

## Supplementary file 2. ICPC codes and description of codes for the disease count

### Codes to measure the disease count

The combination of the following 92 ICPC-2 codes were used to measure the disease count. If codes are not mutually exclusive (e.g. T89 and T90), then they count for one.

| ICPC code | Description                        |
|-----------|------------------------------------|
| A79       | Malignancy NOS                     |
| A90       | Congenital anomaly OS/multiple     |
| B72       | Hodgkin's disease/lymphoma         |
| B73       | Leukaemia                          |
| B74       | Malignant neoplasm blood other     |
| B78       | Hereditary haemolytic anaemia      |
| B83       | Purpura/coagulation defect         |
| B90       | HIV-infection/aids                 |
| D74       | Malignant neoplasm stomach         |
| D75       | Malignant neoplasm colon/rectum    |
| D76       | Malignant neoplasm pancreas        |
| D77       | Malig. neoplasm digest other/NOS   |
| F83       | Retinopathy                        |
| F84       | Macular degeneration               |
| F94       | Blindness                          |
| H83       | Otosclerosis                       |
| H84       | Presbycusis                        |
| H86       | Deafness                           |
| K74       | Ischaemic heart disease w. angina  |
| K75       | Acute myocardial infarction        |
| K76       | Ischaemic heart disease w/o angina |
| K77       | Heart failure                      |
| K82       | Pulmonary heart disease            |
| K86       | Hypertension uncomplicated         |
| K87       | Hypertension complicated           |
| K90       | Stroke/cerebrovascular accident    |
| K91       | Cerebrovascular disease            |
| K92       | Atherosclerosis/PVD                |
| K93       | Pulmonary embolism                 |
| K94       | Phlebitis/thrombophlebitis         |
| L84       | Back syndrome w/o radiating pain   |
| L85       | Acquired deformity of spine        |
| L88       | Reumatoïde arthritis               |
| L89       | Osteoarthrosis of hip              |
| L90       | Osteoarthrosis of knee             |
| L91       | Osteoarthrosis other               |
| L95       | Osteoporosis                       |
| L98       | Acquired deformity of limb         |
| N70       | Poliomyelitis                      |
| N74       | Malignant neoplasm nervous system  |
| N85       | Congenital anomaly neurological    |



|    |     |                                       |
|----|-----|---------------------------------------|
| 1  |     |                                       |
| 2  |     |                                       |
| 3  | N86 | Multiple sclerosis                    |
| 4  | N87 | Parkinsonism                          |
| 5  | N88 | Epilepsy                              |
| 6  | N89 | Migraine                              |
| 7  | N90 | Cluster headache                      |
| 8  | N92 | Trigeminal neuralgia                  |
| 9  | P15 | Substance abuse: chronic alcohol      |
| 10 | P28 | Limited function/disability (p)       |
| 11 | P70 | Dementia                              |
| 12 | P71 | Organic psychosis other               |
| 13 | P72 | Schizophrenia                         |
| 14 | P73 | Affective psychosis                   |
| 15 | P74 | Anxiety disorder/anxiety state        |
| 16 | P75 | Somatization disorder                 |
| 17 | P76 | Depressive disorder                   |
| 18 | P77 | Suicide/suicide attempt               |
| 19 | P79 | Phobia/compulsive disorder            |
| 20 | P80 | Personality disorder                  |
| 21 | P85 | Mental retardation                    |
| 22 | P98 | Psychosis NOS/other                   |
| 23 | R79 | Chronic bronchitis                    |
| 24 | R84 | Malignant neoplasm bronchus/lung      |
| 25 | R85 | Malignant neoplasm respiratory, other |
| 26 | R95 | Chronic obstructive pulmonary disease |
| 27 | R96 | Asthma                                |
| 28 | S77 | Malignant neoplasm of skin            |
| 29 | S87 | Dermatitis/atopic eczema              |
| 30 | S91 | Psoriasis                             |
| 31 | S97 | Chronic ulcer skin                    |
| 32 | T71 | Malignant neoplasm thyroid            |
| 33 | T80 | Congenital anom endocrine/metab.      |
| 34 | T85 | Hyperthyroidism/thyrotoxicosis        |
| 35 | T86 | Hypothyroidism/myxoedema              |
| 36 | T89 | Diabetes insulin dependent            |
| 37 | T90 | Diabetes non-insulin dependent        |
| 38 | T92 | Gout                                  |
| 39 | T93 | Lipid disorder                        |
| 40 | T99 | Endocrine/metab/nutrit. dis. other    |
| 41 | U04 | Incontinence urine                    |
| 42 | U75 | Malignant neoplasm of kidney          |
| 43 | U76 | Malignant neoplasm of bladder         |
| 44 | U77 | Malignant neoplasm urinary other      |
| 45 | U85 | Congenital anomaly urinary tract      |
| 46 | U88 | Glomerulonephritis/nephrosis          |
| 47 | W72 | Malignant neoplasm relate to preg.    |
| 48 | X75 | Malignant neoplasm cervix             |
| 49 | X76 | Malignant neoplasm breast female      |
| 50 | X77 | Malignant neoplasm genital other (f)  |
| 51 | Y77 | Malignant neoplasm prostate           |
| 52 | Y78 | Malign neoplasm male genital other    |
| 53 | Y85 | Benign prostatic hypertrophy          |
| 54 |     |                                       |
| 55 |     |                                       |
| 56 |     |                                       |
| 57 |     |                                       |
| 58 |     |                                       |
| 59 |     |                                       |
| 60 |     |                                       |

### Other ICPC codes used in this manuscript

| ICPC code | description                                             |
|-----------|---------------------------------------------------------|
| P17       | Substance abuse: tobacco                                |
| P19       | Substance abuse: drug abuse                             |
| L89       | Osteoarthritis of the hip                               |
| L90       | Osteoarthritis of the knee                              |
| L91       | Osteoarthritis of other locations (other than knee/hip) |

### ICPC codes used with Intego software to define multimorbidity

#### Definition of cancer

Intego uses a set of 22 ICPC-2 codes to define cancer as a multimorbidity: A79, B73, B72, B74, D74, D75, D76, D77, L71, N74, R84, R85, T71, U75, U76, U77, W72, X75, X76, X77, Y77, and Y78.

#### Definition of substance abuse

Intego uses a combination of three ICPC-2 codes to define substance abuse: P15, P 17, and P19.

Supplementary file 3. ACT coding for pharmacological agents used in the management of knee osteoarthritis.

|                                        | <b>ACT coding</b>                                                                                                     |
|----------------------------------------|-----------------------------------------------------------------------------------------------------------------------|
| Acetaminophen                          | N02BE01                                                                                                               |
| Oral NSAID (exclusion cox-2 selective) | M01AB<br>M01AC-M01AE<br>M01AG                                                                                         |
| COX-2 selective NSAID                  | M01AH                                                                                                                 |
| Topical NSAID                          | M02AA                                                                                                                 |
| Glucosamine supplements                | M01AX05                                                                                                               |
| Chondroitin supplements                | M01AX25                                                                                                               |
| Hyaluronic acid                        | M09AX01                                                                                                               |
| Weak opioids                           | N02AX02<br>N02AJ01<br>N02AJ02<br>N02AJ03<br>N02AJ06<br>N02AJ07<br>N02AJ08<br>N02AJ09<br>N02AJ13<br>N02AJ14<br>N02AJ15 |
| Strong opioids                         | N02AA<br>N02AB<br>N02AC<br>N02AD<br>N02AE<br>N02AF                                                                    |
| Glucocorticoids                        | H02AB                                                                                                                 |

Supplementary file 4. Number of people in the yearly contact group (by gender and age cohort) in Intego (1996-2015)

| Year                        | 1996   | 1997   | 1998   | 1999   | 2000   | 2001   | 2002   | 2003   | 2004   | 2005   |
|-----------------------------|--------|--------|--------|--------|--------|--------|--------|--------|--------|--------|
| <b>Yearly contact group</b> | 83011  | 81763  | 85940  | 86535  | 95932  | 90973  | 106664 | 125202 | 120962 | 128251 |
| <b>Total prevalence</b>     | 1595   | 1809   | 2055   | 2236   | 2439   | 2554   | 2973   | 3268   | 3516   | 4069   |
| <b>knee osteoarthritis*</b> | (1.92) | (2.21) | (2.39) | (2.58) | (2.54) | (2.81) | (2.79) | (2.61) | (2.91) | (3.17) |
| <b>By gender</b>            |        |        |        |        |        |        |        |        |        |        |
| Male                        | 39648  | 38927  | 40796  | 41252  | 45478  | 43325  | 50857  | 59759  | 57700  | 61446  |
| Female                      | 43363  | 42836  | 45144  | 45283  | 50454  | 47648  | 55807  | 65443  | 63262  | 66805  |
| <b>By age cohort</b>        |        |        |        |        |        |        |        |        |        |        |
| ≤ 24 year                   | 23732  | 23712  | 24493  | 24206  | 25165  | 24237  | 29108  | 34424  | 32142  | 34294  |
| 25-34 year                  | 14859  | 13322  | 13741  | 13243  | 14185  | 12899  | 14699  | 17477  | 16617  | 17538  |
| 35-44 year                  | 13919  | 13462  | 14123  | 14240  | 16502  | 14404  | 16189  | 19282  | 18303  | 19040  |
| 45-54 year                  | 9993   | 10315  | 11193  | 11599  | 13405  | 12812  | 14933  | 17469  | 17199  | 18450  |
| 55-64 year                  | 8107   | 8148   | 8633   | 8675   | 9798   | 9729   | 11704  | 13731  | 13754  | 14826  |
| 65-74 year                  | 7266   | 7357   | 7755   | 8027   | 9121   | 8943   | 10488  | 11961  | 11950  | 12247  |
| 75-84 year                  | 3797   | 3955   | 4367   | 4694   | 5559   | 5785   | 7097   | 8218   | 8414   | 8900   |
| ≥ 85 year                   | 1338   | 1492   | 1635   | 1851   | 2197   | 2164   | 2446   | 2640   | 2583   | 2956   |

| Year                                                                                                                                                                          | 2006   | 2007   | 2008   | 2009   | 2010   | 2011   | 2012   | 2013   | 2014   | 2015   |
|-------------------------------------------------------------------------------------------------------------------------------------------------------------------------------|--------|--------|--------|--------|--------|--------|--------|--------|--------|--------|
| <b>Yearly contact group</b>                                                                                                                                                   | 133931 | 132322 | 134733 | 140259 | 140126 | 151971 | 127717 | 130398 | 131651 | 123261 |
| <b>Total prevalence</b>                                                                                                                                                       | 4284   | 4454   | 4695   | 4798   | 5003   | 5223   | 4635   | 5081   | 5041   | 5049   |
| <b>Knee osteoarthritis*</b>                                                                                                                                                   | (3.20) | (3.37) | (3.48) | (3.42) | (3.57) | (3.44) | (3.63) | (3.90) | (3.83) | (4.09) |
| <b>By gender</b>                                                                                                                                                              |        |        |        |        |        |        |        |        |        |        |
| Male                                                                                                                                                                          | 64012  | 63472  | 64423  | 67305  | 67075  | 72892  | 60829  | 62541  | 63404  | 58841  |
| Female                                                                                                                                                                        | 69919  | 68850  | 70310  | 72954  | 73051  | 79079  | 66888  | 67857  | 68247  | 64420  |
| <b>By age cohort</b>                                                                                                                                                          |        |        |        |        |        |        |        |        |        |        |
| ≤ 24 year                                                                                                                                                                     | 35769  | 35655  | 36210  | 38384  | 38014  | 41116  | 34065  | 35626  | 35673  | 33736  |
| 25-34 year                                                                                                                                                                    | 18551  | 18311  | 18916  | 20113  | 20003  | 21668  | 18264  | 18804  | 19578  | 17818  |
| 35-44 year                                                                                                                                                                    | 19640  | 18767  | 18672  | 19137  | 18627  | 19883  | 16597  | 16865  | 17434  | 15937  |
| 45-54 year                                                                                                                                                                    | 19379  | 19220  | 19595  | 20210  | 20345  | 22093  | 17972  | 18207  | 18220  | 16950  |
| 55-64 year                                                                                                                                                                    | 15512  | 15636  | 16054  | 16523  | 16827  | 18570  | 15657  | 15827  | 16037  | 15415  |
| 65-74 year                                                                                                                                                                    | 12372  | 12135  | 12108  | 12347  | 12363  | 13780  | 11505  | 11567  | 11494  | 11169  |
| 75-84 year                                                                                                                                                                    | 9305   | 9214   | 9439   | 9694   | 9835   | 10388  | 9070   | 8938   | 8601   | 8140   |
| ≥ 85 year                                                                                                                                                                     | 3403   | 3384   | 3739   | 3851   | 4112   | 4473   | 4587   | 4564   | 4614   | 4096   |
| <b>Legend:</b>                                                                                                                                                                |        |        |        |        |        |        |        |        |        |        |
| *(%) = proportion of patients with knee osteoarthritis. This proportion describes the data from the Intego registry and is not standardized for the total Flemish population. |        |        |        |        |        |        |        |        |        |        |

## Supplementary file 5. Demographic characteristics of patients with knee osteoarthritis in Intego registry (1996, 2005, and 2015).

|                                          | 1996***     |                                                 | 2005        |                                                 | 2015        |                                                 |
|------------------------------------------|-------------|-------------------------------------------------|-------------|-------------------------------------------------|-------------|-------------------------------------------------|
|                                          | n/N         | %<br>Non-<br>standardized<br>vs<br>standardized | n/N         | %<br>Non-<br>standardized<br>vs<br>standardized | n/N         | %<br>Non-<br>standardized<br>vs<br>standardized |
| <b>Prevalence,<br/>gender</b>            |             |                                                 |             |                                                 |             |                                                 |
| <b>Total</b>                             | 1.595/83011 | 1.92; 1.99                                      | 4069/128251 | 3.17;2.79                                       | 5049/123261 | 4.09; 3.56                                      |
| <b>Men</b>                               | 518/39648   | 1.31; 1.32                                      | 1348/61446  | 2.20;1.97                                       | 1817/58841  | 3.09; 2.59                                      |
| <b>Women</b>                             | 1077/43363  | 2.48; 2.64                                      | 2721/66805  | 4.07;3.67                                       | 3232/64420  | 5.02;4.55                                       |
| <b>Prevalence,<br/>age<br/>cohorts**</b> |             |                                                 |             |                                                 |             |                                                 |
| <b>≤ 24</b>                              | 172         | 1.59                                            | 307         | 1.89                                            | 232         | 1.56                                            |
| <b>25-34</b>                             | 101         | 0.68                                            | 272         | 1.55                                            | 324         | 1.82                                            |
| <b>35-44</b>                             | 98          | 0.70                                            | 225         | 1.18                                            | 353         | 2.22                                            |
| <b>45-54</b>                             | 155         | 1.55                                            | 372         | 2.01                                            | 532         | 3.13                                            |
| <b>55-64</b>                             | 240         | 2.96                                            | 606         | 4.08                                            | 863         | 5.60                                            |
| <b>65-74</b>                             | 442         | 6.08                                            | 887         | 7.24                                            | 1002        | 9.00                                            |
| <b>75-84</b>                             | 303         | 7.98                                            | 1038        | 11.66                                           | 1130        | 13.9                                            |
| <b>≥ 85</b>                              | 84          | 6.28                                            | 362         | 12.24                                           | 613         | 15.0                                            |
| <b>Incidence,<br/>gender</b>             |             |                                                 |             |                                                 |             |                                                 |
| <b>Total</b>                             | 325/81416   | 0.40; 0.42                                      | 378/124182  | 0.30;0.28                                       | 470/118212  | 0.40; 0.38                                      |
| <b>Men</b>                               | 102/39130   | 0.26; 0.27                                      | 129/60098   | 0.21;0.19                                       | 167/57024   | 0.29; 0.26                                      |
| <b>Women</b>                             | 223/42286   | 0.53; 0.58                                      | 249/64084   | 0.39;0.38                                       | 303/61188   | 0.50;0.49                                       |

### **Legend:**

**N=**yearly contact group: the number of patients that visited their general practitioner at least once during once year

**\***the first % refers to the age-specific data from the Intego register; the second % is the standardized Intego data for the total Flemish population.

**\*\*** Standardization was possible for the total population, but not for specific age cohorts.

**\*\*\*** Data are available for 20-year period. In this table 10-year interval periods are described.

## The RECORD statement

Checklist of items, extended from the STROBE statement that should be reported in observational studies using routinely collected health data.

|                           | Item No. | STROBE items                                                                                                                                                                               | Location in manuscript where items are reported | RECORD items                                                                                                                                                                                                                                                                                                                                                                                                                                       | Location in manuscript where items are reported                                                  |
|---------------------------|----------|--------------------------------------------------------------------------------------------------------------------------------------------------------------------------------------------|-------------------------------------------------|----------------------------------------------------------------------------------------------------------------------------------------------------------------------------------------------------------------------------------------------------------------------------------------------------------------------------------------------------------------------------------------------------------------------------------------------------|--------------------------------------------------------------------------------------------------|
| <b>Title and abstract</b> |          |                                                                                                                                                                                            |                                                 |                                                                                                                                                                                                                                                                                                                                                                                                                                                    |                                                                                                  |
|                           | 1        | (a) Indicate the study's design with a commonly used term in the title or the abstract (b) Provide in the abstract an informative and balanced summary of what was done and what was found |                                                 | <p>RECORD 1.1: The type of data used should be specified in the title or abstract. When possible, the name of the databases used should be included.</p> <p>RECORD 1.2: If applicable, the geographic region and timeframe within which the study took place should be reported in the title or abstract.</p> <p>RECORD 1.3: If linkage between databases was conducted for the study, this should be clearly stated in the title or abstract.</p> | <p>1.1: Title (Title page and abstract)</p> <p>1.2 Geographic region: abstract</p> <p>1.3 NA</p> |
| <b>Introduction</b>       |          |                                                                                                                                                                                            |                                                 |                                                                                                                                                                                                                                                                                                                                                                                                                                                    |                                                                                                  |
| Background rationale      | 2        | Explain the scientific background and rationale for the investigation being reported                                                                                                       |                                                 |                                                                                                                                                                                                                                                                                                                                                                                                                                                    | Introduction, p.2, paragraph 1-4                                                                 |
| Objectives                | 3        | State specific objectives, including any prespecified hypotheses                                                                                                                           |                                                 |                                                                                                                                                                                                                                                                                                                                                                                                                                                    | Introduction, p.2, paragraph 4                                                                   |
| <b>Methods</b>            |          |                                                                                                                                                                                            |                                                 |                                                                                                                                                                                                                                                                                                                                                                                                                                                    |                                                                                                  |
| Study Design              | 4        | Present key elements of study design early in the paper                                                                                                                                    |                                                 |                                                                                                                                                                                                                                                                                                                                                                                                                                                    | Methods, p. 3, design                                                                            |

|                              |   |                                                                                                                                                                                                                                                                                                                                                                                                                                                                                                                                                                                                                                                                                                                              |  |                                                                                                                                                                                                                                                                                                                                                                                                                                                                                                                                                                                                                                                                                                      |                                                                                                                                                                                                                 |
|------------------------------|---|------------------------------------------------------------------------------------------------------------------------------------------------------------------------------------------------------------------------------------------------------------------------------------------------------------------------------------------------------------------------------------------------------------------------------------------------------------------------------------------------------------------------------------------------------------------------------------------------------------------------------------------------------------------------------------------------------------------------------|--|------------------------------------------------------------------------------------------------------------------------------------------------------------------------------------------------------------------------------------------------------------------------------------------------------------------------------------------------------------------------------------------------------------------------------------------------------------------------------------------------------------------------------------------------------------------------------------------------------------------------------------------------------------------------------------------------------|-----------------------------------------------------------------------------------------------------------------------------------------------------------------------------------------------------------------|
| Setting                      | 5 | Describe the setting, locations, and relevant dates, including periods of recruitment, exposure, follow-up, and data collection                                                                                                                                                                                                                                                                                                                                                                                                                                                                                                                                                                                              |  |                                                                                                                                                                                                                                                                                                                                                                                                                                                                                                                                                                                                                                                                                                      | Methods, pp. 3-4, design and data collection                                                                                                                                                                    |
| Participants                 | 6 | <p>(a) <i>Cohort study</i> - Give the eligibility criteria, and the sources and methods of selection of participants. Describe methods of follow-up</p> <p><i>Case-control study</i> - Give the eligibility criteria, and the sources and methods of case ascertainment and control selection. Give the rationale for the choice of cases and controls</p> <p><i>Cross-sectional study</i> - Give the eligibility criteria, and the sources and methods of selection of participants</p> <p>(b) <i>Cohort study</i> - For matched studies, give matching criteria and number of exposed and unexposed</p> <p><i>Case-control study</i> - For matched studies, give matching criteria and the number of controls per case</p> |  | <p>RECORD 6.1: The methods of study population selection (such as codes or algorithms used to identify subjects) should be listed in detail. If this is not possible, an explanation should be provided.</p> <p>RECORD 6.2: Any validation studies of the codes or algorithms used to select the population should be referenced. If validation was conducted for this study and not published elsewhere, detailed methods and results should be provided.</p> <p>RECORD 6.3: If the study involved linkage of databases, consider use of a flow diagram or other graphical display to demonstrate the data linkage process, including the number of individuals with linked data at each stage.</p> | <p>6.1 Methods, p. 3, supplementary file 3 for the ICPC codes and supplementary file 4 for the ACT codes</p> <p>6.2 Intego registry external validation described in Truyers et al. Reference</p> <p>6.3 NA</p> |
| Variables                    | 7 | Clearly define all outcomes, exposures, predictors, potential confounders, and effect modifiers. Give diagnostic criteria, if applicable.                                                                                                                                                                                                                                                                                                                                                                                                                                                                                                                                                                                    |  | RECORD 7.1: A complete list of codes and algorithms used to classify exposures, outcomes, confounders, and effect modifiers should be provided. If these cannot be reported, an explanation should be provided.                                                                                                                                                                                                                                                                                                                                                                                                                                                                                      | 7.1 Methods, p. 3, design, supplementary file 1 till 4                                                                                                                                                          |
| Data sources/<br>measurement | 8 | For each variable of interest, give sources of data and details of methods of assessment (measurement).                                                                                                                                                                                                                                                                                                                                                                                                                                                                                                                                                                                                                      |  |                                                                                                                                                                                                                                                                                                                                                                                                                                                                                                                                                                                                                                                                                                      | Page 5: Methods, design pp. 3-4, the Intego                                                                                                                                                                     |



|                                  |    |                                                                                                                                                                                                                                                                                                                                                                                                                                                                                                                                                                      |  |                                                              |                                                                        |
|----------------------------------|----|----------------------------------------------------------------------------------------------------------------------------------------------------------------------------------------------------------------------------------------------------------------------------------------------------------------------------------------------------------------------------------------------------------------------------------------------------------------------------------------------------------------------------------------------------------------------|--|--------------------------------------------------------------|------------------------------------------------------------------------|
|                                  |    | Describe comparability of assessment methods if there is more than one group                                                                                                                                                                                                                                                                                                                                                                                                                                                                                         |  |                                                              | Database is explained in detail                                        |
| Bias                             | 9  | Describe any efforts to address potential sources of bias                                                                                                                                                                                                                                                                                                                                                                                                                                                                                                            |  |                                                              | Methods, design, p.3 and Discussion, pp. 11-12, paragraph 5            |
| Study size                       | 10 | Explain how the study size was arrived at                                                                                                                                                                                                                                                                                                                                                                                                                                                                                                                            |  |                                                              | NA                                                                     |
| Quantitative variables           | 11 | Explain how quantitative variables were handled in the analyses. If applicable, describe which groupings were chosen, and why                                                                                                                                                                                                                                                                                                                                                                                                                                        |  |                                                              | Methods, data analysis p.5                                             |
| Statistical methods              | 12 | (a) Describe all statistical methods, including those used to control for confounding<br>(b) Describe any methods used to examine subgroups and interactions<br>(c) Explain how missing data were addressed<br>(d) <i>Cohort study</i> - If applicable, explain how loss to follow-up was addressed<br><i>Case-control study</i> - If applicable, explain how matching of cases and controls was addressed<br><i>Cross-sectional study</i> - If applicable, describe analytical methods taking account of sampling strategy<br>(e) Describe any sensitivity analyses |  |                                                              | (a) methods, data analysis p.5<br>(b) NA<br>(c) NA<br>(d) NA<br>(e) NA |
| Data access and cleaning methods |    | ..                                                                                                                                                                                                                                                                                                                                                                                                                                                                                                                                                                   |  | RECORD 12.1: Authors should describe the extent to which the | 12.1 Data sharing statement, p.14                                      |

|                  |    |                                                                                                                                                                                                                                                                                                                                                 |  |                                                                                                                                                                                                                                                                                                                    |                                                                            |
|------------------|----|-------------------------------------------------------------------------------------------------------------------------------------------------------------------------------------------------------------------------------------------------------------------------------------------------------------------------------------------------|--|--------------------------------------------------------------------------------------------------------------------------------------------------------------------------------------------------------------------------------------------------------------------------------------------------------------------|----------------------------------------------------------------------------|
|                  |    |                                                                                                                                                                                                                                                                                                                                                 |  | investigators had access to the database population used to create the study population.<br><br>RECORD 12.2: Authors should provide information on the data cleaning methods used in the study.                                                                                                                    | 12.2 Availability of data and materials, p.14                              |
| Linkage          |    | ..                                                                                                                                                                                                                                                                                                                                              |  | RECORD 12.3: State whether the study included person-level, institutional-level, or other data linkage across two or more databases. The methods of linkage and methods of linkage quality evaluation should be provided.                                                                                          | NA                                                                         |
| <b>Results</b>   |    |                                                                                                                                                                                                                                                                                                                                                 |  |                                                                                                                                                                                                                                                                                                                    |                                                                            |
| Participants     | 13 | (a) Report the numbers of individuals at each stage of the study ( <i>e.g.</i> , numbers potentially eligible, examined for eligibility, confirmed eligible, included in the study, completing follow-up, and analysed)<br>(b) Give reasons for non-participation at each stage.<br>(c) Consider use of a flow diagram                          |  | RECORD 13.1: Describe in detail the selection of the persons included in the study ( <i>i.e.</i> , study population selection) including filtering based on data quality, data availability and linkage. The selection of included persons can be described in the text and/or by means of the study flow diagram. | NA                                                                         |
| Descriptive data | 14 | (a) Give characteristics of study participants ( <i>e.g.</i> , demographic, clinical, social) and information on exposures and potential confounders<br>(b) Indicate the number of participants with missing data for each variable of interest<br>(c) <i>Cohort study</i> - summarise follow-up time ( <i>e.g.</i> , average and total amount) |  |                                                                                                                                                                                                                                                                                                                    | (a) Results, pp. 6-9<br>Table 1<br>Figures 1-3<br><br>(b) NA<br><br>(c) NA |

|                                                                                              |                   |    |                                                                                                                                                                                                                                                                                                                                                                                                                                |  |                                                                                                                                                                                                                   |                                                  |
|----------------------------------------------------------------------------------------------|-------------------|----|--------------------------------------------------------------------------------------------------------------------------------------------------------------------------------------------------------------------------------------------------------------------------------------------------------------------------------------------------------------------------------------------------------------------------------|--|-------------------------------------------------------------------------------------------------------------------------------------------------------------------------------------------------------------------|--------------------------------------------------|
| 1<br>2<br>3<br>4<br>5<br>6<br>7<br>8<br>9<br>10<br>11                                        | Outcome data      | 15 | <p><i>Cohort study</i> - Report numbers of outcome events or summary measures over time</p> <p><i>Case-control study</i> - Report numbers in each exposure category, or summary measures of exposure</p> <p><i>Cross-sectional study</i> - Report numbers of outcome events or summary measures</p>                                                                                                                            |  |                                                                                                                                                                                                                   | NA                                               |
| 12<br>13<br>14<br>15<br>16<br>17<br>18<br>19<br>20<br>21<br>22<br>23<br>24<br>25<br>26<br>27 | Main results      | 16 | <p>(a) Give unadjusted estimates and, if applicable, confounder-adjusted estimates and their precision (e.g., 95% confidence interval). Make clear which confounders were adjusted for and why they were included</p> <p>(b) Report category boundaries when continuous variables were categorized</p> <p>(c) If relevant, consider translating estimates of relative risk into absolute risk for a meaningful time period</p> |  |                                                                                                                                                                                                                   | (a) Results, pp. 6-9<br>Table 1-3<br>Figures 1-3 |
| 28<br>29<br>30<br>31<br>32                                                                   | Other analyses    | 17 | Report other analyses done—e.g., analyses of subgroups and interactions, and sensitivity analyses                                                                                                                                                                                                                                                                                                                              |  |                                                                                                                                                                                                                   | NA                                               |
| 33                                                                                           | <b>Discussion</b> |    |                                                                                                                                                                                                                                                                                                                                                                                                                                |  |                                                                                                                                                                                                                   |                                                  |
| 34<br>35<br>36                                                                               | Key results       | 18 | Summarise key results with reference to study objectives                                                                                                                                                                                                                                                                                                                                                                       |  |                                                                                                                                                                                                                   | Discussion, last paragraph with conclusions p.12 |
| 37<br>38<br>39<br>40<br>41<br>42<br>43<br>44                                                 | Limitations       | 19 | Discuss limitations of the study, taking into account sources of potential bias or imprecision. Discuss both direction and magnitude of any potential bias                                                                                                                                                                                                                                                                     |  | RECORD 19.1: Discuss the implications of using data that were not created or collected to answer the specific research question(s). Include discussion of misclassification bias, unmeasured confounding, missing | Discussion, paragraph 5, pp. 11-12               |

|                                                           |    |                                                                                                                                                                            |  |                                                                                                                                                          |                                          |
|-----------------------------------------------------------|----|----------------------------------------------------------------------------------------------------------------------------------------------------------------------------|--|----------------------------------------------------------------------------------------------------------------------------------------------------------|------------------------------------------|
|                                                           |    |                                                                                                                                                                            |  | data, and changing eligibility over time, as they pertain to the study being reported.                                                                   |                                          |
| Interpretation                                            | 20 | Give a cautious overall interpretation of results considering objectives, limitations, multiplicity of analyses, results from similar studies, and other relevant evidence |  |                                                                                                                                                          | Discussion, pp. 10-12                    |
| Generalisability                                          | 21 | Discuss the generalisability (external validity) of the study results                                                                                                      |  |                                                                                                                                                          | Discussion, pp. 10-12                    |
| <b>Other Information</b>                                  |    |                                                                                                                                                                            |  |                                                                                                                                                          |                                          |
| Funding                                                   | 22 | Give the source of funding and the role of the funders for the present study and, if applicable, for the original study on which the present article is based              |  |                                                                                                                                                          | Funding, p.14                            |
| Accessibility of protocol, raw data, and programming code |    | ..                                                                                                                                                                         |  | RECORD 22.1: Authors should provide information on how to access any supplemental information such as the study protocol, raw data, or programming code. | Availability of data and materials, p.14 |

\*Reference: Benchimol EI, Smeeth L, Guttman A, Harron K, Moher D, Petersen I, Sørensen HT, von Elm E, Langan SM, the RECORD Working Committee. The REporting of studies Conducted using Observational Routinely-collected health Data (RECORD) Statement. *PLoS Medicine* 2015; in press.
