# Supplementary material for: Epidemiology of knee osteoarthritis in general practice: a registry-based study
Source: PubMed Central journal article supplement — BMJ Open. 2020 Jan 20;10(1):e031734. doi: 10.1136/bmjopen-2019-031734 (PMC7044813; doi:10.1136/bmjopen-2019-031734), 2020-01-20
Supplement: bmjopen-2019-031734supp003.pdf [file bmjopen-2019-031734supp003.pdf]

### Supplementary file 3. ACT coding for pharmacological agents used in the management of knee osteoarthritis.

|                                        | <b>ACT coding</b>                                                                                                     |
|----------------------------------------|-----------------------------------------------------------------------------------------------------------------------|
| Acetaminophen                          | N02BE01                                                                                                               |
| Oral NSAID (exclusion cox-2 selective) | M01AB<br>M01AC-M01AE<br>M01AG                                                                                         |
| COX-2 selective NSAID                  | M01AH                                                                                                                 |
| Topical NSAID                          | M02AA                                                                                                                 |
| Glucosamine supplements                | M01AX05                                                                                                               |
| Chondroitin supplements                | M01AX25                                                                                                               |
| Hyaluronic acid                        | M09AX01                                                                                                               |
| Weak opioids                           | N02AX02<br>N02AJ01<br>N02AJ02<br>N02AJ03<br>N02AJ06<br>N02AJ07<br>N02AJ08<br>N02AJ09<br>N02AJ13<br>N02AJ14<br>N02AJ15 |
| Strong opioids                         | N02AA<br>N02AB<br>N02AC<br>N02AD<br>N02AE<br>N02AF                                                                    |
| Glucocorticoids                        | H02AB                                                                                                                 |
