# Supplementary material for: Epidemiology of knee osteoarthritis in general practice: a registry-based study
Source: PubMed Central journal article supplement — BMJ Open. 2020 Jan 20;10(1):e031734. doi: 10.1136/bmjopen-2019-031734 (PMC7044813; doi:10.1136/bmjopen-2019-031734), 2020-01-20
Supplement: bmjopen-2019-031734supp004.pdf [file bmjopen-2019-031734supp004.pdf]

Supplementary file 4. Number of people in the yearly contact group (by gender and age cohort) in Intego (1996-2015)

| <b>Year</b>                                  | <b>1996</b>    | <b>1997</b>    | <b>1998</b>    | <b>1999</b>    | <b>2000</b>    | <b>2001</b>    | <b>2002</b>    | <b>2003</b>    | <b>2004</b>    | <b>2005</b>    |
|----------------------------------------------|----------------|----------------|----------------|----------------|----------------|----------------|----------------|----------------|----------------|----------------|
| <b>Yearly contact group</b>                  | 83011          | 81763          | 85940          | 86535          | 95932          | 90973          | 106664         | 125202         | 120962         | 128251         |
| <b>Total prevalence knee osteoarthritis*</b> | 1595<br>(1.92) | 1809<br>(2.21) | 2055<br>(2.39) | 2236<br>(2.58) | 2439<br>(2.54) | 2554<br>(2.81) | 2973<br>(2.79) | 3268<br>(2.61) | 3516<br>(2.91) | 4069<br>(3.17) |
| <b>By gender</b>                             |                |                |                |                |                |                |                |                |                |                |
| Male                                         | 39648          | 38927          | 40796          | 41252          | 45478          | 43325          | 50857          | 59759          | 57700          | 61446          |
| Female                                       | 43363          | 42836          | 45144          | 45283          | 50454          | 47648          | 55807          | 65443          | 63262          | 66805          |
| <b>By age cohort</b>                         |                |                |                |                |                |                |                |                |                |                |
| ≤ 24 year                                    | 23732          | 23712          | 24493          | 24206          | 25165          | 24237          | 29108          | 34424          | 32142          | 34294          |
| 25-34 year                                   | 14859          | 13322          | 13741          | 13243          | 14185          | 12899          | 14699          | 17477          | 16617          | 17538          |
| 35-44 year                                   | 13919          | 13462          | 14123          | 14240          | 16502          | 14404          | 16189          | 19282          | 18303          | 19040          |
| 45-54 year                                   | 9993           | 10315          | 11193          | 11599          | 13405          | 12812          | 14933          | 17469          | 17199          | 18450          |
| 55-64 year                                   | 8107           | 8148           | 8633           | 8675           | 9798           | 9729           | 11704          | 13731          | 13754          | 14826          |
| 65-74 year                                   | 7266           | 7357           | 7755           | 8027           | 9121           | 8943           | 10488          | 11961          | 11950          | 12247          |
| 75-84 year                                   | 3797           | 3955           | 4367           | 4694           | 5559           | 5785           | 7097           | 8218           | 8414           | 8900           |
| ≥ 85 year                                    | 1338           | 1492           | 1635           | 1851           | 2197           | 2164           | 2446           | 2640           | 2583           | 2956           |

| <b>Year</b>                 | <b>2006</b> | <b>2007</b> | <b>2008</b> | <b>2009</b> | <b>2010</b> | <b>2011</b> | <b>2012</b> | <b>2013</b> | <b>2014</b> | <b>2015</b> |
|-----------------------------|-------------|-------------|-------------|-------------|-------------|-------------|-------------|-------------|-------------|-------------|
| <b>Yearly contact group</b> | 133931      | 132322      | 134733      | 140259      | 140126      | 151971      | 127717      | 130398      | 131651      | 123261      |
| <b>Total prevalence</b>     | 4284        | 4454        | 4695        | 4798        | 5003        | 5223        | 4635        | 5081        | 5041        | 5049        |
| <b>Knee osteoarthritis*</b> | (3.20)      | (3.37)      | (3.48)      | (3.42)      | (3.57)      | (3.44)      | (3.63)      | (3.90)      | (3.83)      | (4.09)      |
| <b>By gender</b>            |             |             |             |             |             |             |             |             |             |             |
| Male                        | 64012       | 63472       | 64423       | 67305       | 67075       | 72892       | 60829       | 62541       | 63404       | 58841       |
| Female                      | 69919       | 68850       | 70310       | 72954       | 73051       | 79079       | 66888       | 67857       | 68247       | 64420       |
| <b>By age cohort</b>        |             |             |             |             |             |             |             |             |             |             |
| ≤ 24 year                   | 35769       | 35655       | 36210       | 38384       | 38014       | 41116       | 34065       | 35626       | 35673       | 33736       |
| 25-34 year                  | 18551       | 18311       | 18916       | 20113       | 20003       | 21668       | 18264       | 18804       | 19578       | 17818       |
| 35-44 year                  | 19640       | 18767       | 18672       | 19137       | 18627       | 19883       | 16597       | 16865       | 17434       | 15937       |
| 45-54 year                  | 19379       | 19220       | 19595       | 20210       | 20345       | 22093       | 17972       | 18207       | 18220       | 16950       |
| 55-64 year                  | 15512       | 15636       | 16054       | 16523       | 16827       | 18570       | 15657       | 15827       | 16037       | 15415       |
| 65-74 year                  | 12372       | 12135       | 12108       | 12347       | 12363       | 13780       | 11505       | 11567       | 11494       | 11169       |
| 75-84 year                  | 9305        | 9214        | 9439        | 9694        | 9835        | 10388       | 9070        | 8938        | 8601        | 8140        |
| ≥ 85 year                   | 3403        | 3384        | 3739        | 3851        | 4112        | 4473        | 4587        | 4564        | 4614        | 4096        |

**Legend:**

\*(%) = proportion of patients with knee osteoarthritis. This proportion describes the data from the Intego registry and is not standardized for the total Flemish population.
