# Supplementary material for: Epidemiology of knee osteoarthritis in general practice: a registry-based study
Source: PubMed Central journal article supplement — BMJ Open. 2020 Jan 20;10(1):e031734. doi: 10.1136/bmjopen-2019-031734 (PMC7044813; doi:10.1136/bmjopen-2019-031734), 2020-01-20
Supplement: bmjopen-2019-031734supp005.pdf [file bmjopen-2019-031734supp005.pdf]

## Supplementary file 5. Demographic characteristics of patients with knee osteoarthritis in Intego registry (1996, 2005, and 2015).

|                                          | 1996***     |                                                 | 2005        |                                                 | 2015        |                                                 |
|------------------------------------------|-------------|-------------------------------------------------|-------------|-------------------------------------------------|-------------|-------------------------------------------------|
|                                          | n/N         | %<br>Non-<br>standardized<br>vs<br>standardized | n/N         | %<br>Non-<br>standardized<br>vs<br>standardized | n/N         | %<br>Non-<br>standardized<br>vs<br>standardized |
| <b>Prevalence,<br/>gender</b>            |             |                                                 |             |                                                 |             |                                                 |
| <b>Total</b>                             | 1.595/83011 | 1.92; 1.99                                      | 4069/128251 | 3.17;2.79                                       | 5049/123261 | 4.09; 3.56                                      |
| <b>Men</b>                               | 518/39648   | 1.31; 1.32                                      | 1348/61446  | 2.20;1.97                                       | 1817/58841  | 3.09; 2.59                                      |
| <b>Women</b>                             | 1077/43363  | 2.48; 2.64                                      | 2721/66805  | 4.07;3.67                                       | 3232/64420  | 5.02;4.55                                       |
| <b>Prevalence,<br/>age<br/>cohorts**</b> |             |                                                 |             |                                                 |             |                                                 |
| <b>≤ 24</b>                              | 172         | 1.59                                            | 307         | 1.89                                            | 232         | 1.56                                            |
| <b>25-34</b>                             | 101         | 0.68                                            | 272         | 1.55                                            | 324         | 1.82                                            |
| <b>35-44</b>                             | 98          | 0.70                                            | 225         | 1.18                                            | 353         | 2.22                                            |
| <b>45-54</b>                             | 155         | 1.55                                            | 372         | 2.01                                            | 532         | 3.13                                            |
| <b>55-64</b>                             | 240         | 2.96                                            | 606         | 4.08                                            | 863         | 5.60                                            |
| <b>65-74</b>                             | 442         | 6.08                                            | 887         | 7.24                                            | 1002        | 9.00                                            |
| <b>75-84</b>                             | 303         | 7.98                                            | 1038        | 11.66                                           | 1130        | 13.9                                            |
| <b>≥ 85</b>                              | 84          | 6.28                                            | 362         | 12.24                                           | 613         | 15.0                                            |
| <b>Incidence,<br/>gender</b>             |             |                                                 |             |                                                 |             |                                                 |
| <b>Total</b>                             | 325/81416   | 0.40; 0.42                                      | 378/124182  | 0.30;0.28                                       | 470/118212  | 0.40; 0.38                                      |
| <b>Men</b>                               | 102/39130   | 0.26; 0.27                                      | 129/60098   | 0.21;0.19                                       | 167/57024   | 0.29; 0.26                                      |
| <b>Women</b>                             | 223/42286   | 0.53; 0.58                                      | 249/64084   | 0.39;0.38                                       | 303/61188   | 0.50;0.49                                       |

### **Legend:**

**N=yearly contact group: the number of patients that visited their general practitioner at least once during once year**

**\*the first % refers to the age-specific data from the Intego register; the second % is the standardized Intego data for the total Flemish population.**

**\*\* Standardization was possible for the total population, but not for specific age cohorts.**

**\*\*\* Data are available for 20-year period. In this table 10-year interval periods are described.**
