# Supplementary figures and images for: Epidemiology of knee osteoarthritis in general practice: a registry-based study
Source: PubMed Central journal article supplement — BMJ Open. 2020 Jan 20;10(1):e031734. doi: 10.1136/bmjopen-2019-031734 (PMC7044813; doi:10.1136/bmjopen-2019-031734), 2020-01-20

### Supplementary file 1. Participation of GP practices in Intego (1996-2015)

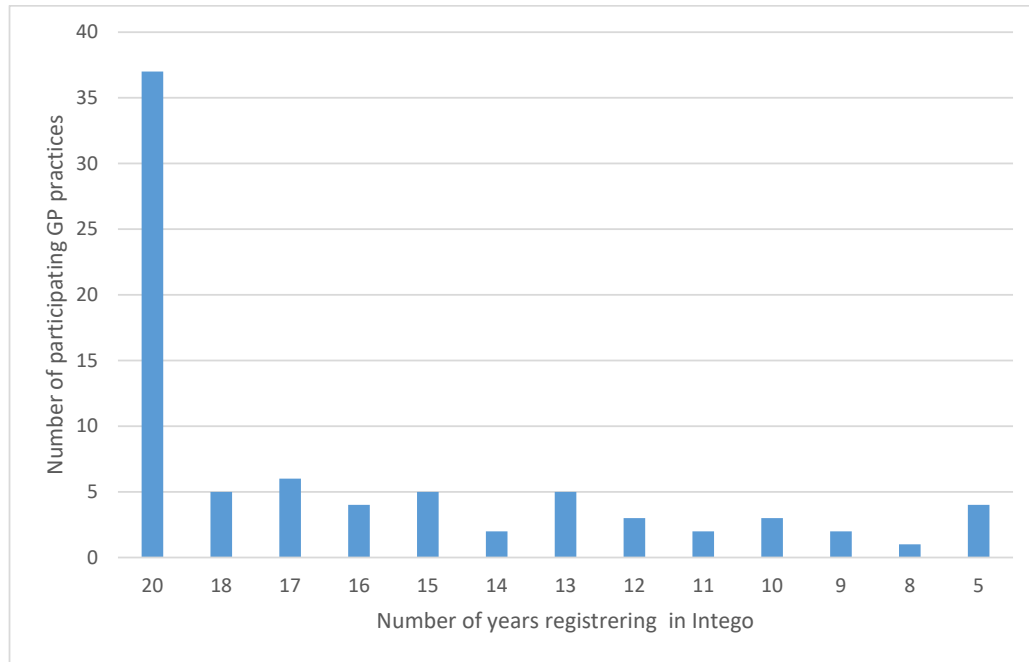

Supplement: bmjopen-2019-031734supp001.pdf [file bmjopen-2019-031734supp001.pdf]
